# Supplementary material
Source: MDPI journal article supplement (https://www.mdpi.com/2071-1050/10/10/3546)
Supplement: s1 [file s1]

Archive with 2 entries (2 files):
- Bath LCA Manuscript Results.SI_Proof.xlsx
- sustainability-361181-supplementary_proof.pdf
