# Supplementary material
Source: MDPI journal article supplement (https://www.mdpi.com/2071-1050/10/10/3546)
Supplement: s1 [file s1 › Bath LCA Manuscript Results.SI_Proof.xlsx]

## Sheet: Cover Page
Supporting Information
SI File Title: Bath WRRF Results File
Paper Title: Effect of Nutrient Removal and Resource Recovery on Life Cycle Cost and Environmental Impacts of A Small Scale Water Resource Recovery Facility
Ben Morelli1, Sarah Cashman1, Xin (Cissy) Ma2*, Jay Garland3, Jason Turgeon4, Lauren Fillmore5, Diana Bless2, Michael Nye3
1Eastern Research Group, 110 Hartwell Ave., Lexington, MA 02421, USA
2United States Environmental Protection Agency, National Risk Management Research Laboratory, 26 West Martin Luther King Drive, Cincinnati, OH 45268, USA
3 United States Environmental Protection Agency, National Exposure Research Laboratory, 26 West Martin Luther King Drive, Cincinnati, OH 45268, USA
4 United States Environmental Protection Agency, Region 1, 5 Post Office Square, Suite 100, OEP 5-2, Boston, MA 02109
5Water Environment & Reuse Foundation, 1199 N Fairfax Street, Suite 900, Alexandria, VA 22314
*Corresponding author:
Xin (Cissy) Ma, PhD
U.S. Environmental Protection Agency
National Risk Management Research Laboratory
26 West Martin Luther King Drive (MS 483)
Cincinnati, OH 45268
Phone: (513) 569-7194
Email: Ma.Cissy@epa.gov
Contents: 2 Tables
This supporting information (SI) file contains the full life cycle impact assessment (LCIA) results for all legacy and upgraded wastewater resource recovery facility (WRRF) scenarios. Life cycle inventory (LCI) calculations to derive these resutls are provided in a separate SI Word file.
Table of Contents
Legacy WRRF LCIA Results (Table S22)
Upgraded WRRF LCIA Results (Table S23)
Impact Category Acronyms: AP - Acidification Potential, CED - Cumulative Energy Demand, EP - Eutrophication Potential, FDP - Fossil Depletion Potential, GCCP - Global Climate Change Potential, PMFP - Particulate Matter Formation Potential, SFP - Smog Formation Potential, WU - Water Use

## Sheet: Legacy WRRF LCIA Results
	Table S22. Legacy WRRF LCIA Results
	Unit Process	EOL Emission Scenario	Landfill	Impact Category	Impact Result	Units/m3 wastewater treated
	Wastewater collection	Low	Bath Landfill	GCCP	0.01351	kg CO2 eq
	Screening and Grit Removal	Low	Bath Landfill	GCCP	0.00732	kg CO2 eq
	Primary Clarifier	Low	Bath Landfill	GCCP	0.11263	kg CO2 eq
	Aeration Tanks	Low	Bath Landfill	GCCP	0.152	kg CO2 eq
	Sludge Thickener	Low	Bath Landfill	GCCP	0.00094	kg CO2 eq
	Aerobic Digester	Low	Bath Landfill	GCCP	0.206	kg CO2 eq
	Belt filter press	Low	Bath Landfill	GCCP	0.00744	kg CO2 eq
	Sludge Disposal	Low	Bath Landfill	GCCP	0.12368	kg CO2 eq
	Effluent release	Low	Bath Landfill	GCCP	0.0741	kg CO2 eq
	Control Building	Low	Bath Landfill	GCCP	0.05257	kg CO2 eq
	Wastewater collection	Low	Bath Landfill	EP	3.75598e-05	kg N eq
	Screening and Grit Removal	Low	Bath Landfill	EP	2.43016e-05	kg N eq
	Primary Clarifier	Low	Bath Landfill	EP	0.00043	kg N eq
	Aeration Tanks	Low	Bath Landfill	EP	0.00042	kg N eq
	Sludge Thickener	Low	Bath Landfill	EP	3.04184e-06	kg N eq
	Aerobic Digester	Low	Bath Landfill	EP	0.00042	kg N eq
	Belt filter press	Low	Bath Landfill	EP	2.64299e-05	kg N eq
	Sludge Disposal	Low	Bath Landfill	EP	-7.82197e-05	kg N eq
	Effluent release	Low	Bath Landfill	EP	0.0231	kg N eq
	Control Building	Low	Bath Landfill	EP	3.33768e-05	kg N eq
	Wastewater collection	Low	Bath Landfill	CED	0.25606	MJ
	Screening and Grit Removal	Low	Bath Landfill	CED	0.1525	MJ
	Primary Clarifier	Low	Bath Landfill	CED	1.77208	MJ
	Aeration Tanks	Low	Bath Landfill	CED	2.71282	MJ
	Sludge Thickener	Low	Bath Landfill	CED	0.01987	MJ
	Aerobic Digester	Low	Bath Landfill	CED	2.71897	MJ
	Belt filter press	Low	Bath Landfill	CED	0.16199	MJ
	Sludge Disposal	Low	Bath Landfill	CED	0.34827	MJ
	Effluent release	Low	Bath Landfill	CED	0.00347	MJ
	Control Building	Low	Bath Landfill	CED	0.92825	MJ
	Wastewater collection	Low	Bath Landfill	WU	5.06089e-06	m3 H2O
	Screening and Grit Removal	Low	Bath Landfill	WU	9.98847e-06	m3 H2O
	Primary Clarifier	Low	Bath Landfill	WU	0.00076	m3 H2O
	Aeration Tanks	Low	Bath Landfill	WU	0.00015	m3 H2O
	Sludge Thickener	Low	Bath Landfill	WU	5.71535e-06	m3 H2O
	Aerobic Digester	Low	Bath Landfill	WU	0.0001	m3 H2O
	Belt filter press	Low	Bath Landfill	WU	7.80348e-05	m3 H2O
	Sludge Disposal	Low	Bath Landfill	WU	1.56562e-05	m3 H2O
	Effluent release	Low	Bath Landfill	WU	2.14447e-06	m3 H2O
	Control Building	Low	Bath Landfill	WU	0.00012	m3 H2O
	Wastewater collection	Low	Bath Landfill	PMFP	0.00017	kg PM2.5 eq
	Screening and Grit Removal	Low	Bath Landfill	PMFP	9.79833e-05	kg PM2.5 eq
	Primary Clarifier	Low	Bath Landfill	PMFP	0.00055	kg PM2.5 eq
	Aeration Tanks	Low	Bath Landfill	PMFP	0.00178	kg PM2.5 eq
	Sludge Thickener	Low	Bath Landfill	PMFP	1.12426e-05	kg PM2.5 eq
	Aerobic Digester	Low	Bath Landfill	PMFP	0.00182	kg PM2.5 eq
	Belt filter press	Low	Bath Landfill	PMFP	8.61084e-05	kg PM2.5 eq
	Sludge Disposal	Low	Bath Landfill	PMFP	-0.00044	kg PM2.5 eq
	Effluent release	Low	Bath Landfill	PMFP	6.27477e-07	kg PM2.5 eq
	Control Building	Low	Bath Landfill	PMFP	1.54618e-05	kg PM2.5 eq
	Wastewater collection	Low	Bath Landfill	SFP	0.01192	kg O3 eq
	Screening and Grit Removal	Low	Bath Landfill	SFP	0.00695	kg O3 eq
	Primary Clarifier	Low	Bath Landfill	SFP	0.03647	kg O3 eq
	Aeration Tanks	Low	Bath Landfill	SFP	0.12629	kg O3 eq
	Sludge Thickener	Low	Bath Landfill	SFP	0.0008	kg O3 eq
	Aerobic Digester	Low	Bath Landfill	SFP	0.12926	kg O3 eq
	Belt filter press	Low	Bath Landfill	SFP	0.0061	kg O3 eq
	Sludge Disposal	Low	Bath Landfill	SFP	-0.03014	kg O3 eq
	Effluent release	Low	Bath Landfill	SFP	4.0287e-05	kg O3 eq
	Control Building	Low	Bath Landfill	SFP	0.00137	kg O3 eq
	Wastewater collection	Low	Bath Landfill	AP	0.00123	kg SO2 eq
	Screening and Grit Removal	Low	Bath Landfill	AP	0.00072	kg SO2 eq
	Primary Clarifier	Low	Bath Landfill	AP	0.00466	kg SO2 eq
	Aeration Tanks	Low	Bath Landfill	AP	0.01312	kg SO2 eq
	Sludge Thickener	Low	Bath Landfill	AP	8.28769e-05	kg SO2 eq
	Aerobic Digester	Low	Bath Landfill	AP	0.01343	kg SO2 eq
	Belt filter press	Low	Bath Landfill	AP	0.00064	kg SO2 eq
	Sludge Disposal	Low	Bath Landfill	AP	-0.00322	kg SO2 eq
	Effluent release	Low	Bath Landfill	AP	3.98189e-06	kg SO2 eq
	Control Building	Low	Bath Landfill	AP	0.00013	kg SO2 eq
	Wastewater collection	Low	Bath Landfill	FDP	0.0045	kg oil eq
	Screening and Grit Removal	Low	Bath Landfill	FDP	0.00275	kg oil eq
	Primary Clarifier	Low	Bath Landfill	FDP	0.02963	kg oil eq
	Aeration Tanks	Low	Bath Landfill	FDP	0.04886	kg oil eq
	Sludge Thickener	Low	Bath Landfill	FDP	0.00037	kg oil eq
	Aerobic Digester	Low	Bath Landfill	FDP	0.04892	kg oil eq
	Belt filter press	Low	Bath Landfill	FDP	0.00308	kg oil eq
	Sludge Disposal	Low	Bath Landfill	FDP	0.01191	kg oil eq
	Effluent release	Low	Bath Landfill	FDP	6.41862e-05	kg oil eq
	Control Building	Low	Bath Landfill	FDP	0.02143	kg oil eq
	Wastewater collection	Low	Landfill National	GCCP	0.01351	kg CO2 eq
	Screening and Grit Removal	Low	Landfill National	GCCP	0.00732	kg CO2 eq
	Primary Clarifier	Low	Landfill National	GCCP	0.11263	kg CO2 eq
	Aeration Tanks	Low	Landfill National	GCCP	0.152	kg CO2 eq
	Sludge Thickener	Low	Landfill National	GCCP	0.00094	kg CO2 eq
	Aerobic Digester	Low	Landfill National	GCCP	0.206	kg CO2 eq
	Belt filter press	Low	Landfill National	GCCP	0.00744	kg CO2 eq
	Sludge Disposal	Low	Landfill National	GCCP	0.28661	kg CO2 eq
	Effluent release	Low	Landfill National	GCCP	0.0741	kg CO2 eq
	Control Building	Low	Landfill National	GCCP	0.05257	kg CO2 eq
	Wastewater collection	Low	Landfill National	EP	3.75598e-05	kg N eq
	Screening and Grit Removal	Low	Landfill National	EP	2.43016e-05	kg N eq
	Primary Clarifier	Low	Landfill National	EP	0.00043	kg N eq
	Aeration Tanks	Low	Landfill National	EP	0.00042	kg N eq
	Sludge Thickener	Low	Landfill National	EP	3.04184e-06	kg N eq
	Aerobic Digester	Low	Landfill National	EP	0.00042	kg N eq
	Belt filter press	Low	Landfill National	EP	2.64299e-05	kg N eq
	Sludge Disposal	Low	Landfill National	EP	-3.66733e-05	kg N eq
	Effluent release	Low	Landfill National	EP	0.0231	kg N eq
	Control Building	Low	Landfill National	EP	3.33768e-05	kg N eq
	Wastewater collection	Low	Landfill National	CED	0.25606	MJ
	Screening and Grit Removal	Low	Landfill National	CED	0.1525	MJ
	Primary Clarifier	Low	Landfill National	CED	1.77208	MJ
	Aeration Tanks	Low	Landfill National	CED	2.71282	MJ
	Sludge Thickener	Low	Landfill National	CED	0.01987	MJ
	Aerobic Digester	Low	Landfill National	CED	2.71897	MJ
	Belt filter press	Low	Landfill National	CED	0.16199	MJ
	Sludge Disposal	Low	Landfill National	CED	0.62107	MJ
	Effluent release	Low	Landfill National	CED	0.00347	MJ
	Control Building	Low	Landfill National	CED	0.92825	MJ
	Wastewater collection	Low	Landfill National	WU	5.06089e-06	m3 H2O
	Screening and Grit Removal	Low	Landfill National	WU	9.98847e-06	m3 H2O
	Primary Clarifier	Low	Landfill National	WU	0.00076	m3 H2O
	Aeration Tanks	Low	Landfill National	WU	0.00015	m3 H2O
	Sludge Thickener	Low	Landfill National	WU	5.71535e-06	m3 H2O
	Aerobic Digester	Low	Landfill National	WU	0.0001	m3 H2O
	Belt filter press	Low	Landfill National	WU	7.80348e-05	m3 H2O
	Sludge Disposal	Low	Landfill National	WU	1.97643e-05	m3 H2O
	Effluent release	Low	Landfill National	WU	2.14447e-06	m3 H2O
	Control Building	Low	Landfill National	WU	0.00012	m3 H2O
	Wastewater collection	Low	Landfill National	PMFP	0.00017	kg PM2.5 eq
	Screening and Grit Removal	Low	Landfill National	PMFP	9.79833e-05	kg PM2.5 eq
	Primary Clarifier	Low	Landfill National	PMFP	0.00055	kg PM2.5 eq
	Aeration Tanks	Low	Landfill National	PMFP	0.00178	kg PM2.5 eq
	Sludge Thickener	Low	Landfill National	PMFP	1.12426e-05	kg PM2.5 eq
	Aerobic Digester	Low	Landfill National	PMFP	0.00182	kg PM2.5 eq
	Belt filter press	Low	Landfill National	PMFP	8.61084e-05	kg PM2.5 eq
	Sludge Disposal	Low	Landfill National	PMFP	-0.00026	kg PM2.5 eq
	Effluent release	Low	Landfill National	PMFP	6.27477e-07	kg PM2.5 eq
	Control Building	Low	Landfill National	PMFP	1.54618e-05	kg PM2.5 eq
	Wastewater collection	Low	Landfill National	SFP	0.01192	kg O3 eq
	Screening and Grit Removal	Low	Landfill National	SFP	0.00695	kg O3 eq
	Primary Clarifier	Low	Landfill National	SFP	0.03647	kg O3 eq
	Aeration Tanks	Low	Landfill National	SFP	0.12629	kg O3 eq
	Sludge Thickener	Low	Landfill National	SFP	0.0008	kg O3 eq
	Aerobic Digester	Low	Landfill National	SFP	0.12926	kg O3 eq
	Belt filter press	Low	Landfill National	SFP	0.0061	kg O3 eq
	Sludge Disposal	Low	Landfill National	SFP	-0.01691	kg O3 eq
	Effluent release	Low	Landfill National	SFP	4.0287e-05	kg O3 eq
	Control Building	Low	Landfill National	SFP	0.00137	kg O3 eq
	Wastewater collection	Low	Landfill National	AP	0.00123	kg SO2 eq
	Screening and Grit Removal	Low	Landfill National	AP	0.00072	kg SO2 eq
	Primary Clarifier	Low	Landfill National	AP	0.00466	kg SO2 eq
	Aeration Tanks	Low	Landfill National	AP	0.01312	kg SO2 eq
	Sludge Thickener	Low	Landfill National	AP	8.28769e-05	kg SO2 eq
	Aerobic Digester	Low	Landfill National	AP	0.01343	kg SO2 eq
	Belt filter press	Low	Landfill National	AP	0.00064	kg SO2 eq
	Sludge Disposal	Low	Landfill National	AP	-0.00185	kg SO2 eq
	Effluent release	Low	Landfill National	AP	3.98189e-06	kg SO2 eq
	Control Building	Low	Landfill National	AP	0.00013	kg SO2 eq
	Wastewater collection	Low	Landfill National	FDP	0.0045	kg oil eq
	Screening and Grit Removal	Low	Landfill National	FDP	0.00275	kg oil eq
	Primary Clarifier	Low	Landfill National	FDP	0.02963	kg oil eq
	Aeration Tanks	Low	Landfill National	FDP	0.04886	kg oil eq
	Sludge Thickener	Low	Landfill National	FDP	0.00037	kg oil eq
	Aerobic Digester	Low	Landfill National	FDP	0.04892	kg oil eq
	Belt filter press	Low	Landfill National	FDP	0.00308	kg oil eq
	Sludge Disposal	Low	Landfill National	FDP	0.01681	kg oil eq
	Effluent release	Low	Landfill National	FDP	6.41862e-05	kg oil eq
	Control Building	Low	Landfill National	FDP	0.02143	kg oil eq
	Wastewater collection	Base	Bath Landfill	GCCP	0.01351	kg CO2 eq
	Screening and Grit Removal	Base	Bath Landfill	GCCP	0.00732	kg CO2 eq
	Primary Clarifier	Base	Bath Landfill	GCCP	0.11263	kg CO2 eq
	Aeration Tanks	Base	Bath Landfill	GCCP	0.152	kg CO2 eq
	Sludge Thickener	Base	Bath Landfill	GCCP	0.00094	kg CO2 eq
	Aerobic Digester	Base	Bath Landfill	GCCP	0.206	kg CO2 eq
	Belt filter press	Base	Bath Landfill	GCCP	0.00744	kg CO2 eq
	Sludge Disposal	Base	Bath Landfill	GCCP	0.12368	kg CO2 eq
	Effluent release	Base	Bath Landfill	GCCP	0.0741	kg CO2 eq
	Control Building	Base	Bath Landfill	GCCP	0.05257	kg CO2 eq
	Wastewater collection	Base	Bath Landfill	EP	3.75598e-05	kg N eq
	Screening and Grit Removal	Base	Bath Landfill	EP	2.43016e-05	kg N eq
	Primary Clarifier	Base	Bath Landfill	EP	0.00043	kg N eq
	Aeration Tanks	Base	Bath Landfill	EP	0.00042	kg N eq
	Sludge Thickener	Base	Bath Landfill	EP	3.04184e-06	kg N eq
	Aerobic Digester	Base	Bath Landfill	EP	0.00042	kg N eq
	Belt filter press	Base	Bath Landfill	EP	2.64299e-05	kg N eq
	Sludge Disposal	Base	Bath Landfill	EP	-7.82197e-05	kg N eq
	Effluent release	Base	Bath Landfill	EP	0.0231	kg N eq
	Control Building	Base	Bath Landfill	EP	3.33768e-05	kg N eq
	Wastewater collection	Base	Bath Landfill	CED	0.25606	MJ
	Screening and Grit Removal	Base	Bath Landfill	CED	0.1525	MJ
	Primary Clarifier	Base	Bath Landfill	CED	1.77208	MJ
	Aeration Tanks	Base	Bath Landfill	CED	2.71282	MJ
	Sludge Thickener	Base	Bath Landfill	CED	0.01987	MJ
	Aerobic Digester	Base	Bath Landfill	CED	2.71897	MJ
	Belt filter press	Base	Bath Landfill	CED	0.16199	MJ
	Sludge Disposal	Base	Bath Landfill	CED	0.34827	MJ
	Effluent release	Base	Bath Landfill	CED	0.00347	MJ
	Control Building	Base	Bath Landfill	CED	0.92825	MJ
	Wastewater collection	Base	Bath Landfill	WU	5.06089e-06	m3 H2O
	Screening and Grit Removal	Base	Bath Landfill	WU	9.98847e-06	m3 H2O
	Primary Clarifier	Base	Bath Landfill	WU	0.00076	m3 H2O
	Aeration Tanks	Base	Bath Landfill	WU	0.00015	m3 H2O
	Sludge Thickener	Base	Bath Landfill	WU	5.71535e-06	m3 H2O
	Aerobic Digester	Base	Bath Landfill	WU	0.0001	m3 H2O
	Belt filter press	Base	Bath Landfill	WU	7.80348e-05	m3 H2O
	Sludge Disposal	Base	Bath Landfill	WU	1.56562e-05	m3 H2O
	Effluent release	Base	Bath Landfill	WU	2.14447e-06	m3 H2O
	Control Building	Base	Bath Landfill	WU	0.00012	m3 H2O
	Wastewater collection	Base	Bath Landfill	PMFP	0.00017	kg PM2.5 eq
	Screening and Grit Removal	Base	Bath Landfill	PMFP	9.79833e-05	kg PM2.5 eq
	Primary Clarifier	Base	Bath Landfill	PMFP	0.00055	kg PM2.5 eq
	Aeration Tanks	Base	Bath Landfill	PMFP	0.00178	kg PM2.5 eq
	Sludge Thickener	Base	Bath Landfill	PMFP	1.12426e-05	kg PM2.5 eq
	Aerobic Digester	Base	Bath Landfill	PMFP	0.00182	kg PM2.5 eq
	Belt filter press	Base	Bath Landfill	PMFP	8.61084e-05	kg PM2.5 eq
	Sludge Disposal	Base	Bath Landfill	PMFP	-0.00044	kg PM2.5 eq
	Effluent release	Base	Bath Landfill	PMFP	6.27477e-07	kg PM2.5 eq
	Control Building	Base	Bath Landfill	PMFP	1.54618e-05	kg PM2.5 eq
	Wastewater collection	Base	Bath Landfill	SFP	0.01192	kg O3 eq
	Screening and Grit Removal	Base	Bath Landfill	SFP	0.00695	kg O3 eq
	Primary Clarifier	Base	Bath Landfill	SFP	0.03647	kg O3 eq
	Aeration Tanks	Base	Bath Landfill	SFP	0.12629	kg O3 eq
	Sludge Thickener	Base	Bath Landfill	SFP	0.0008	kg O3 eq
	Aerobic Digester	Base	Bath Landfill	SFP	0.12926	kg O3 eq
	Belt filter press	Base	Bath Landfill	SFP	0.0061	kg O3 eq
	Sludge Disposal	Base	Bath Landfill	SFP	-0.03014	kg O3 eq
	Effluent release	Base	Bath Landfill	SFP	4.0287e-05	kg O3 eq
	Control Building	Base	Bath Landfill	SFP	0.00137	kg O3 eq
	Wastewater collection	Base	Bath Landfill	AP	0.00123	kg SO2 eq
	Screening and Grit Removal	Base	Bath Landfill	AP	0.00072	kg SO2 eq
	Primary Clarifier	Base	Bath Landfill	AP	0.00466	kg SO2 eq
	Aeration Tanks	Base	Bath Landfill	AP	0.01312	kg SO2 eq
	Sludge Thickener	Base	Bath Landfill	AP	8.28769e-05	kg SO2 eq
	Aerobic Digester	Base	Bath Landfill	AP	0.01343	kg SO2 eq
	Belt filter press	Base	Bath Landfill	AP	0.00064	kg SO2 eq
	Sludge Disposal	Base	Bath Landfill	AP	-0.00322	kg SO2 eq
	Effluent release	Base	Bath Landfill	AP	3.98189e-06	kg SO2 eq
	Control Building	Base	Bath Landfill	AP	0.00013	kg SO2 eq
	Wastewater collection	Base	Bath Landfill	FDP	0.0045	kg oil eq
	Screening and Grit Removal	Base	Bath Landfill	FDP	0.00275	kg oil eq
	Primary Clarifier	Base	Bath Landfill	FDP	0.02963	kg oil eq
	Aeration Tanks	Base	Bath Landfill	FDP	0.04886	kg oil eq
	Sludge Thickener	Base	Bath Landfill	FDP	0.00037	kg oil eq
	Aerobic Digester	Base	Bath Landfill	FDP	0.04892	kg oil eq
	Belt filter press	Base	Bath Landfill	FDP	0.00308	kg oil eq
	Sludge Disposal	Base	Bath Landfill	FDP	0.01191	kg oil eq
	Effluent release	Base	Bath Landfill	FDP	6.41862e-05	kg oil eq
	Control Building	Base	Bath Landfill	FDP	0.02143	kg oil eq
	Wastewater collection	Base	Landfill National	GCCP	0.01351	kg CO2 eq
	Screening and Grit Removal	Base	Landfill National	GCCP	0.00732	kg CO2 eq
	Primary Clarifier	Base	Landfill National	GCCP	0.11263	kg CO2 eq
	Aeration Tanks	Base	Landfill National	GCCP	0.152	kg CO2 eq
	Sludge Thickener	Base	Landfill National	GCCP	0.00094	kg CO2 eq
	Aerobic Digester	Base	Landfill National	GCCP	0.206	kg CO2 eq
	Belt filter press	Base	Landfill National	GCCP	0.00744	kg CO2 eq
	Sludge Disposal	Base	Landfill National	GCCP	0.28661	kg CO2 eq
	Effluent release	Base	Landfill National	GCCP	0.0741	kg CO2 eq
	Control Building	Base	Landfill National	GCCP	0.05257	kg CO2 eq
	Wastewater collection	Base	Landfill National	EP	3.75598e-05	kg N eq
	Screening and Grit Removal	Base	Landfill National	EP	2.43016e-05	kg N eq
	Primary Clarifier	Base	Landfill National	EP	0.00043	kg N eq
	Aeration Tanks	Base	Landfill National	EP	0.00042	kg N eq
	Sludge Thickener	Base	Landfill National	EP	3.04184e-06	kg N eq
	Aerobic Digester	Base	Landfill National	EP	0.00042	kg N eq
	Belt filter press	Base	Landfill National	EP	2.64299e-05	kg N eq
	Sludge Disposal	Base	Landfill National	EP	-3.66733e-05	kg N eq
	Effluent release	Base	Landfill National	EP	0.0231	kg N eq
	Control Building	Base	Landfill National	EP	3.33768e-05	kg N eq
	Wastewater collection	Base	Landfill National	CED	0.25606	MJ
	Screening and Grit Removal	Base	Landfill National	CED	0.1525	MJ
	Primary Clarifier	Base	Landfill National	CED	1.77208	MJ
	Aeration Tanks	Base	Landfill National	CED	2.71282	MJ
	Sludge Thickener	Base	Landfill National	CED	0.01987	MJ
	Aerobic Digester	Base	Landfill National	CED	2.71897	MJ
	Belt filter press	Base	Landfill National	CED	0.16199	MJ
	Sludge Disposal	Base	Landfill National	CED	0.62107	MJ
	Effluent release	Base	Landfill National	CED	0.00347	MJ
	Control Building	Base	Landfill National	CED	0.92825	MJ
	Wastewater collection	Base	Landfill National	WU	5.06089e-06	m3 H2O
	Screening and Grit Removal	Base	Landfill National	WU	9.98847e-06	m3 H2O
	Primary Clarifier	Base	Landfill National	WU	0.00076	m3 H2O
	Aeration Tanks	Base	Landfill National	WU	0.00015	m3 H2O
	Sludge Thickener	Base	Landfill National	WU	5.71535e-06	m3 H2O
	Aerobic Digester	Base	Landfill National	WU	0.0001	m3 H2O
	Belt filter press	Base	Landfill National	WU	7.80348e-05	m3 H2O
	Sludge Disposal	Base	Landfill National	WU	1.97643e-05	m3 H2O
	Effluent release	Base	Landfill National	WU	2.14447e-06	m3 H2O
	Control Building	Base	Landfill National	WU	0.00012	m3 H2O
	Wastewater collection	Base	Landfill National	PMFP	0.00017	kg PM2.5 eq
	Screening and Grit Removal	Base	Landfill National	PMFP	9.79833e-05	kg PM2.5 eq
	Primary Clarifier	Base	Landfill National	PMFP	0.00055	kg PM2.5 eq
	Aeration Tanks	Base	Landfill National	PMFP	0.00178	kg PM2.5 eq
	Sludge Thickener	Base	Landfill National	PMFP	1.12426e-05	kg PM2.5 eq
	Aerobic Digester	Base	Landfill National	PMFP	0.00182	kg PM2.5 eq
	Belt filter press	Base	Landfill National	PMFP	8.61084e-05	kg PM2.5 eq
	Sludge Disposal	Base	Landfill National	PMFP	-0.00026	kg PM2.5 eq
	Effluent release	Base	Landfill National	PMFP	6.27477e-07	kg PM2.5 eq
	Control Building	Base	Landfill National	PMFP	1.54618e-05	kg PM2.5 eq
	Wastewater collection	Base	Landfill National	SFP	0.01192	kg O3 eq
	Screening and Grit Removal	Base	Landfill National	SFP	0.00695	kg O3 eq
	Primary Clarifier	Base	Landfill National	SFP	0.03647	kg O3 eq
	Aeration Tanks	Base	Landfill National	SFP	0.12629	kg O3 eq
	Sludge Thickener	Base	Landfill National	SFP	0.0008	kg O3 eq
	Aerobic Digester	Base	Landfill National	SFP	0.12926	kg O3 eq
	Belt filter press	Base	Landfill National	SFP	0.0061	kg O3 eq
	Sludge Disposal	Base	Landfill National	SFP	-0.01691	kg O3 eq
	Effluent release	Base	Landfill National	SFP	4.0287e-05	kg O3 eq
	Control Building	Base	Landfill National	SFP	0.00137	kg O3 eq
	Wastewater collection	Base	Landfill National	AP	0.00123	kg SO2 eq
	Screening and Grit Removal	Base	Landfill National	AP	0.00072	kg SO2 eq
	Primary Clarifier	Base	Landfill National	AP	0.00466	kg SO2 eq
	Aeration Tanks	Base	Landfill National	AP	0.01312	kg SO2 eq
	Sludge Thickener	Base	Landfill National	AP	8.28769e-05	kg SO2 eq
	Aerobic Digester	Base	Landfill National	AP	0.01343	kg SO2 eq
	Belt filter press	Base	Landfill National	AP	0.00064	kg SO2 eq
	Sludge Disposal	Base	Landfill National	AP	-0.00185	kg SO2 eq
	Effluent release	Base	Landfill National	AP	3.98189e-06	kg SO2 eq
	Control Building	Base	Landfill National	AP	0.00013	kg SO2 eq
	Wastewater collection	Base	Landfill National	FDP	0.0045	kg oil eq
	Screening and Grit Removal	Base	Landfill National	FDP	0.00275	kg oil eq
	Primary Clarifier	Base	Landfill National	FDP	0.02963	kg oil eq
	Aeration Tanks	Base	Landfill National	FDP	0.04886	kg oil eq
	Sludge Thickener	Base	Landfill National	FDP	0.00037	kg oil eq
	Aerobic Digester	Base	Landfill National	FDP	0.04892	kg oil eq
	Belt filter press	Base	Landfill National	FDP	0.00308	kg oil eq
	Sludge Disposal	Base	Landfill National	FDP	0.01681	kg oil eq
	Effluent release	Base	Landfill National	FDP	6.41862e-05	kg oil eq
	Control Building	Base	Landfill National	FDP	0.02143	kg oil eq
	Wastewater collection	High	Bath Landfill	GCCP	0.01351	kg CO2 eq
	Screening and Grit Removal	High	Bath Landfill	GCCP	0.00732	kg CO2 eq
	Primary Clarifier	High	Bath Landfill	GCCP	0.11263	kg CO2 eq
	Aeration Tanks	High	Bath Landfill	GCCP	0.152	kg CO2 eq
	Sludge Thickener	High	Bath Landfill	GCCP	0.00094	kg CO2 eq
	Aerobic Digester	High	Bath Landfill	GCCP	0.206	kg CO2 eq
	Belt filter press	High	Bath Landfill	GCCP	0.00744	kg CO2 eq
	Sludge Disposal	High	Bath Landfill	GCCP	0.12368	kg CO2 eq
	Effluent release	High	Bath Landfill	GCCP	0.0741	kg CO2 eq
	Control Building	High	Bath Landfill	GCCP	0.05257	kg CO2 eq
	Wastewater collection	High	Bath Landfill	EP	3.75598e-05	kg N eq
	Screening and Grit Removal	High	Bath Landfill	EP	2.43016e-05	kg N eq
	Primary Clarifier	High	Bath Landfill	EP	0.00043	kg N eq
	Aeration Tanks	High	Bath Landfill	EP	0.00042	kg N eq
	Sludge Thickener	High	Bath Landfill	EP	3.04184e-06	kg N eq
	Aerobic Digester	High	Bath Landfill	EP	0.00042	kg N eq
	Belt filter press	High	Bath Landfill	EP	2.64299e-05	kg N eq
	Sludge Disposal	High	Bath Landfill	EP	-7.82197e-05	kg N eq
	Effluent release	High	Bath Landfill	EP	0.0231	kg N eq
	Control Building	High	Bath Landfill	EP	3.33768e-05	kg N eq
	Wastewater collection	High	Bath Landfill	CED	0.25606	MJ
	Screening and Grit Removal	High	Bath Landfill	CED	0.1525	MJ
	Primary Clarifier	High	Bath Landfill	CED	1.77208	MJ
	Aeration Tanks	High	Bath Landfill	CED	2.71282	MJ
	Sludge Thickener	High	Bath Landfill	CED	0.01987	MJ
	Aerobic Digester	High	Bath Landfill	CED	2.71897	MJ
	Belt filter press	High	Bath Landfill	CED	0.16199	MJ
	Sludge Disposal	High	Bath Landfill	CED	0.34827	MJ
	Effluent release	High	Bath Landfill	CED	0.00347	MJ
	Control Building	High	Bath Landfill	CED	0.92825	MJ
	Wastewater collection	High	Bath Landfill	WU	5.06089e-06	m3 H2O
	Screening and Grit Removal	High	Bath Landfill	WU	9.98847e-06	m3 H2O
	Primary Clarifier	High	Bath Landfill	WU	0.00076	m3 H2O
	Aeration Tanks	High	Bath Landfill	WU	0.00015	m3 H2O
	Sludge Thickener	High	Bath Landfill	WU	5.71535e-06	m3 H2O
	Aerobic Digester	High	Bath Landfill	WU	0.0001	m3 H2O
	Belt filter press	High	Bath Landfill	WU	7.80348e-05	m3 H2O
	Sludge Disposal	High	Bath Landfill	WU	1.56562e-05	m3 H2O
	Effluent release	High	Bath Landfill	WU	2.14447e-06	m3 H2O
	Control Building	High	Bath Landfill	WU	0.00012	m3 H2O
	Wastewater collection	High	Bath Landfill	PMFP	0.00017	kg PM2.5 eq
	Screening and Grit Removal	High	Bath Landfill	PMFP	9.79833e-05	kg PM2.5 eq
	Primary Clarifier	High	Bath Landfill	PMFP	0.00055	kg PM2.5 eq
	Aeration Tanks	High	Bath Landfill	PMFP	0.00178	kg PM2.5 eq
	Sludge Thickener	High	Bath Landfill	PMFP	1.12426e-05	kg PM2.5 eq
	Aerobic Digester	High	Bath Landfill	PMFP	0.00182	kg PM2.5 eq
	Belt filter press	High	Bath Landfill	PMFP	8.61084e-05	kg PM2.5 eq
	Sludge Disposal	High	Bath Landfill	PMFP	-0.00044	kg PM2.5 eq
	Effluent release	High	Bath Landfill	PMFP	6.27477e-07	kg PM2.5 eq
	Control Building	High	Bath Landfill	PMFP	1.54618e-05	kg PM2.5 eq
	Wastewater collection	High	Bath Landfill	SFP	0.01192	kg O3 eq
	Screening and Grit Removal	High	Bath Landfill	SFP	0.00695	kg O3 eq
	Primary Clarifier	High	Bath Landfill	SFP	0.03647	kg O3 eq
	Aeration Tanks	High	Bath Landfill	SFP	0.12629	kg O3 eq
	Sludge Thickener	High	Bath Landfill	SFP	0.0008	kg O3 eq
	Aerobic Digester	High	Bath Landfill	SFP	0.12926	kg O3 eq
	Belt filter press	High	Bath Landfill	SFP	0.0061	kg O3 eq
	Sludge Disposal	High	Bath Landfill	SFP	-0.03014	kg O3 eq
	Effluent release	High	Bath Landfill	SFP	4.0287e-05	kg O3 eq
	Control Building	High	Bath Landfill	SFP	0.00137	kg O3 eq
	Wastewater collection	High	Bath Landfill	AP	0.00123	kg SO2 eq
	Screening and Grit Removal	High	Bath Landfill	AP	0.00072	kg SO2 eq
	Primary Clarifier	High	Bath Landfill	AP	0.00466	kg SO2 eq
	Aeration Tanks	High	Bath Landfill	AP	0.01312	kg SO2 eq
	Sludge Thickener	High	Bath Landfill	AP	8.28769e-05	kg SO2 eq
	Aerobic Digester	High	Bath Landfill	AP	0.01343	kg SO2 eq
	Belt filter press	High	Bath Landfill	AP	0.00064	kg SO2 eq
	Sludge Disposal	High	Bath Landfill	AP	-0.00322	kg SO2 eq
	Effluent release	High	Bath Landfill	AP	3.98189e-06	kg SO2 eq
	Control Building	High	Bath Landfill	AP	0.00013	kg SO2 eq
	Wastewater collection	High	Bath Landfill	FDP	0.0045	kg oil eq
	Screening and Grit Removal	High	Bath Landfill	FDP	0.00275	kg oil eq
	Primary Clarifier	High	Bath Landfill	FDP	0.02963	kg oil eq
	Aeration Tanks	High	Bath Landfill	FDP	0.04886	kg oil eq
	Sludge Thickener	High	Bath Landfill	FDP	0.00037	kg oil eq
	Aerobic Digester	High	Bath Landfill	FDP	0.04892	kg oil eq
	Belt filter press	High	Bath Landfill	FDP	0.00308	kg oil eq
	Sludge Disposal	High	Bath Landfill	FDP	0.01191	kg oil eq
	Effluent release	High	Bath Landfill	FDP	6.41862e-05	kg oil eq
	Control Building	High	Bath Landfill	FDP	0.02143	kg oil eq
	Wastewater collection	High	Landfill National	GCCP	0.01351	kg CO2 eq
	Screening and Grit Removal	High	Landfill National	GCCP	0.00732	kg CO2 eq
	Primary Clarifier	High	Landfill National	GCCP	0.11263	kg CO2 eq
	Aeration Tanks	High	Landfill National	GCCP	0.152	kg CO2 eq
	Sludge Thickener	High	Landfill National	GCCP	0.00094	kg CO2 eq
	Aerobic Digester	High	Landfill National	GCCP	0.206	kg CO2 eq
	Belt filter press	High	Landfill National	GCCP	0.00744	kg CO2 eq
	Sludge Disposal	High	Landfill National	GCCP	0.28661	kg CO2 eq
	Effluent release	High	Landfill National	GCCP	0.0741	kg CO2 eq
	Control Building	High	Landfill National	GCCP	0.05257	kg CO2 eq
	Wastewater collection	High	Landfill National	EP	3.75598e-05	kg N eq
	Screening and Grit Removal	High	Landfill National	EP	2.43016e-05	kg N eq
	Primary Clarifier	High	Landfill National	EP	0.00043	kg N eq
	Aeration Tanks	High	Landfill National	EP	0.00042	kg N eq
	Sludge Thickener	High	Landfill National	EP	3.04184e-06	kg N eq
	Aerobic Digester	High	Landfill National	EP	0.00042	kg N eq
	Belt filter press	High	Landfill National	EP	2.64299e-05	kg N eq
	Sludge Disposal	High	Landfill National	EP	-3.66733e-05	kg N eq
	Effluent release	High	Landfill National	EP	0.0231	kg N eq
	Control Building	High	Landfill National	EP	3.33768e-05	kg N eq
	Wastewater collection	High	Landfill National	CED	0.25606	MJ
	Screening and Grit Removal	High	Landfill National	CED	0.1525	MJ
	Primary Clarifier	High	Landfill National	CED	1.77208	MJ
	Aeration Tanks	High	Landfill National	CED	2.71282	MJ
	Sludge Thickener	High	Landfill National	CED	0.01987	MJ
	Aerobic Digester	High	Landfill National	CED	2.71897	MJ
	Belt filter press	High	Landfill National	CED	0.16199	MJ
	Sludge Disposal	High	Landfill National	CED	0.62107	MJ
	Effluent release	High	Landfill National	CED	0.00347	MJ
	Control Building	High	Landfill National	CED	0.92825	MJ
	Wastewater collection	High	Landfill National	WU	5.06089e-06	m3 H2O
	Screening and Grit Removal	High	Landfill National	WU	9.98847e-06	m3 H2O
	Primary Clarifier	High	Landfill National	WU	0.00076	m3 H2O
	Aeration Tanks	High	Landfill National	WU	0.00015	m3 H2O
	Sludge Thickener	High	Landfill National	WU	5.71535e-06	m3 H2O
	Aerobic Digester	High	Landfill National	WU	0.0001	m3 H2O
	Belt filter press	High	Landfill National	WU	7.80348e-05	m3 H2O
	Sludge Disposal	High	Landfill National	WU	1.97643e-05	m3 H2O
	Effluent release	High	Landfill National	WU	2.14447e-06	m3 H2O
	Control Building	High	Landfill National	WU	0.00012	m3 H2O
	Wastewater collection	High	Landfill National	PMFP	0.00017	kg PM2.5 eq
	Screening and Grit Removal	High	Landfill National	PMFP	9.79833e-05	kg PM2.5 eq
	Primary Clarifier	High	Landfill National	PMFP	0.00055	kg PM2.5 eq
	Aeration Tanks	High	Landfill National	PMFP	0.00178	kg PM2.5 eq
	Sludge Thickener	High	Landfill National	PMFP	1.12426e-05	kg PM2.5 eq
	Aerobic Digester	High	Landfill National	PMFP	0.00182	kg PM2.5 eq
	Belt filter press	High	Landfill National	PMFP	8.61084e-05	kg PM2.5 eq
	Sludge Disposal	High	Landfill National	PMFP	-0.00026	kg PM2.5 eq
	Effluent release	High	Landfill National	PMFP	6.27477e-07	kg PM2.5 eq
	Control Building	High	Landfill National	PMFP	1.54618e-05	kg PM2.5 eq
	Wastewater collection	High	Landfill National	SFP	0.01192	kg O3 eq
	Screening and Grit Removal	High	Landfill National	SFP	0.00695	kg O3 eq
	Primary Clarifier	High	Landfill National	SFP	0.03647	kg O3 eq
	Aeration Tanks	High	Landfill National	SFP	0.12629	kg O3 eq
	Sludge Thickener	High	Landfill National	SFP	0.0008	kg O3 eq
	Aerobic Digester	High	Landfill National	SFP	0.12926	kg O3 eq
	Belt filter press	High	Landfill National	SFP	0.0061	kg O3 eq
	Sludge Disposal	High	Landfill National	SFP	-0.01691	kg O3 eq
	Effluent release	High	Landfill National	SFP	4.0287e-05	kg O3 eq
	Control Building	High	Landfill National	SFP	0.00137	kg O3 eq
	Wastewater collection	High	Landfill National	AP	0.00123	kg SO2 eq
	Screening and Grit Removal	High	Landfill National	AP	0.00072	kg SO2 eq
	Primary Clarifier	High	Landfill National	AP	0.00466	kg SO2 eq
	Aeration Tanks	High	Landfill National	AP	0.01312	kg SO2 eq
	Sludge Thickener	High	Landfill National	AP	8.28769e-05	kg SO2 eq
	Aerobic Digester	High	Landfill National	AP	0.01343	kg SO2 eq
	Belt filter press	High	Landfill National	AP	0.00064	kg SO2 eq
	Sludge Disposal	High	Landfill National	AP	-0.00185	kg SO2 eq
	Effluent release	High	Landfill National	AP	3.98189e-06	kg SO2 eq
	Control Building	High	Landfill National	AP	0.00013	kg SO2 eq
	Wastewater collection	High	Landfill National	FDP	0.0045	kg oil eq
	Screening and Grit Removal	High	Landfill National	FDP	0.00275	kg oil eq
	Primary Clarifier	High	Landfill National	FDP	0.02963	kg oil eq
	Aeration Tanks	High	Landfill National	FDP	0.04886	kg oil eq
	Sludge Thickener	High	Landfill National	FDP	0.00037	kg oil eq
	Aerobic Digester	High	Landfill National	FDP	0.04892	kg oil eq
	Belt filter press	High	Landfill National	FDP	0.00308	kg oil eq
	Sludge Disposal	High	Landfill National	FDP	0.01681	kg oil eq
	Effluent release	High	Landfill National	FDP	6.41862e-05	kg oil eq
	Control Building	High	Landfill National	FDP	0.02143	kg oil eq

## Sheet: Upgraded WRRF LCIA Results
	Table S23. Upgraded WRRF LCIA Results
	Unit Process	Feedstock-AD Scenario	EOL Emission Scenario	Compost System	Amendment	Impact Category	Impact Result	Units/m3 wastewater treated
	Biosolids composting	Base-Base	Base	Windrow	Included	GCCP	0.73433	kg CO2 eq
	Pre-Anoxic & Swing tank	Base-Base	Base	Windrow	Included	GCCP	0.20883	kg CO2 eq
	Aeration Tanks	Base-Base	Base	Windrow	Included	GCCP	0.16822	kg CO2 eq
	Waste Receiving	Base-Base	Base	Windrow	Included	GCCP	0.10241	kg CO2 eq
	Primary Clarification	Base-Base	Base	Windrow	Included	GCCP	0.05708	kg CO2 eq
	Effluent release	Base-Base	Base	Windrow	Included	GCCP	0.05264	kg CO2 eq
	Influent Pump Station	Base-Base	Base	Windrow	Included	GCCP	0.0505	kg CO2 eq
	Wet Well	Base-Base	Base	Windrow	Included	GCCP	0.03326	kg CO2 eq
	Gravity Belt Thickener	Base-Base	Base	Windrow	Included	GCCP	0.01455	kg CO2 eq
	Wastewater collection	Base-Base	Base	Windrow	Included	GCCP	0.01351	kg CO2 eq
	Belt filter press	Base-Base	Base	Windrow	Included	GCCP	0.01278	kg CO2 eq
	Control Building	Base-Base	Base	Windrow	Included	GCCP	0.0083	kg CO2 eq
	Blend Tank	Base-Base	Base	Windrow	Included	GCCP	0.00504	kg CO2 eq
	ClearCove SCP	Base-Base	Base	Windrow	Included	GCCP	0.00241	kg CO2 eq
	Anaerobic Digestion	Base-Base	Base	Windrow	Included	GCCP	-0.05664	kg CO2 eq
	Land Application	Base-Base	Base	Windrow	Included	GCCP	-0.46951	kg CO2 eq
	Effluent release	Base-Base	Base	Windrow	Included	EP	0.01161	kg N eq
	Land Application	Base-Base	Base	Windrow	Included	EP	0.00205	kg N eq
	Aeration Tanks	Base-Base	Base	Windrow	Included	EP	0.00055	kg N eq
	Biosolids composting	Base-Base	Base	Windrow	Included	EP	0.00036	kg N eq
	Influent Pump Station	Base-Base	Base	Windrow	Included	EP	0.00025	kg N eq
	Primary Clarification	Base-Base	Base	Windrow	Included	EP	0.0002	kg N eq
	Waste Receiving	Base-Base	Base	Windrow	Included	EP	0.00016	kg N eq
	Pre-Anoxic & Swing tank	Base-Base	Base	Windrow	Included	EP	0.00014	kg N eq
	Wet Well	Base-Base	Base	Windrow	Included	EP	0.00011	kg N eq
	Gravity Belt Thickener	Base-Base	Base	Windrow	Included	EP	6.05903e-05	kg N eq
	Belt filter press	Base-Base	Base	Windrow	Included	EP	5.06508e-05	kg N eq
	Wastewater collection	Base-Base	Base	Windrow	Included	EP	3.75598e-05	kg N eq
	Control Building	Base-Base	Base	Windrow	Included	EP	3.68746e-05	kg N eq
	Blend Tank	Base-Base	Base	Windrow	Included	EP	1.62157e-05	kg N eq
	ClearCove SCP	Base-Base	Base	Windrow	Included	EP	7.75672e-06	kg N eq
	Anaerobic Digestion	Base-Base	Base	Windrow	Included	EP	-0.0002	kg N eq
	Aeration Tanks	Base-Base	Base	Windrow	Included	AP	0.01722	kg SO2 eq
	Biosolids composting	Base-Base	Base	Windrow	Included	AP	0.00568	kg SO2 eq
	Primary Clarification	Base-Base	Base	Windrow	Included	AP	0.00498	kg SO2 eq
	Pre-Anoxic & Swing tank	Base-Base	Base	Windrow	Included	AP	0.00433	kg SO2 eq
	Wet Well	Base-Base	Base	Windrow	Included	AP	0.00345	kg SO2 eq
	Land Application	Base-Base	Base	Windrow	Included	AP	0.00267	kg SO2 eq
	Waste Receiving	Base-Base	Base	Windrow	Included	AP	0.00238	kg SO2 eq
	Influent Pump Station	Base-Base	Base	Windrow	Included	AP	0.00207	kg SO2 eq
	Wastewater collection	Base-Base	Base	Windrow	Included	AP	0.00123	kg SO2 eq
	Belt filter press	Base-Base	Base	Windrow	Included	AP	0.00077	kg SO2 eq
	Gravity Belt Thickener	Base-Base	Base	Windrow	Included	AP	0.0007	kg SO2 eq
	Blend Tank	Base-Base	Base	Windrow	Included	AP	0.00052	kg SO2 eq
	Effluent release	Base-Base	Base	Windrow	Included	AP	0.00035	kg SO2 eq
	ClearCove SCP	Base-Base	Base	Windrow	Included	AP	0.00026	kg SO2 eq
	Control Building	Base-Base	Base	Windrow	Included	AP	4.03547e-05	kg SO2 eq
	Anaerobic Digestion	Base-Base	Base	Windrow	Included	AP	-0.00645	kg SO2 eq
	Aeration Tanks	Base-Base	Base	Windrow	Included	PMFP	0.00233	kg PM2.5 eq
	Primary Clarification	Base-Base	Base	Windrow	Included	PMFP	0.00068	kg PM2.5 eq
	Pre-Anoxic & Swing tank	Base-Base	Base	Windrow	Included	PMFP	0.00059	kg PM2.5 eq
	Wet Well	Base-Base	Base	Windrow	Included	PMFP	0.00047	kg PM2.5 eq
	Waste Receiving	Base-Base	Base	Windrow	Included	PMFP	0.0003	kg PM2.5 eq
	Influent Pump Station	Base-Base	Base	Windrow	Included	PMFP	0.00027	kg PM2.5 eq
	Biosolids composting	Base-Base	Base	Windrow	Included	PMFP	0.0002	kg PM2.5 eq
	Wastewater collection	Base-Base	Base	Windrow	Included	PMFP	0.00017	kg PM2.5 eq
	Belt filter press	Base-Base	Base	Windrow	Included	PMFP	0.0001	kg PM2.5 eq
	Gravity Belt Thickener	Base-Base	Base	Windrow	Included	PMFP	9.51538e-05	kg PM2.5 eq
	Blend Tank	Base-Base	Base	Windrow	Included	PMFP	6.99422e-05	kg PM2.5 eq
	Effluent release	Base-Base	Base	Windrow	Included	PMFP	4.99741e-05	kg PM2.5 eq
	Land Application	Base-Base	Base	Windrow	Included	PMFP	4.32258e-05	kg PM2.5 eq
	ClearCove SCP	Base-Base	Base	Windrow	Included	PMFP	3.45622e-05	kg PM2.5 eq
	Control Building	Base-Base	Base	Windrow	Included	PMFP	8.8213e-06	kg PM2.5 eq
	Anaerobic Digestion	Base-Base	Base	Windrow	Included	PMFP	-0.00087	kg PM2.5 eq
	Aeration Tanks	Base-Base	Base	Windrow	Included	SFP	0.16577	kg O3 eq
	Primary Clarification	Base-Base	Base	Windrow	Included	SFP	0.04807	kg O3 eq
	Pre-Anoxic & Swing tank	Base-Base	Base	Windrow	Included	SFP	0.04178	kg O3 eq
	Wet Well	Base-Base	Base	Windrow	Included	SFP	0.03313	kg O3 eq
	Waste Receiving	Base-Base	Base	Windrow	Included	SFP	0.02795	kg O3 eq
	Influent Pump Station	Base-Base	Base	Windrow	Included	SFP	0.0194	kg O3 eq
	Wastewater collection	Base-Base	Base	Windrow	Included	SFP	0.01192	kg O3 eq
	Belt filter press	Base-Base	Base	Windrow	Included	SFP	0.00735	kg O3 eq
	Gravity Belt Thickener	Base-Base	Base	Windrow	Included	SFP	0.00665	kg O3 eq
	Blend Tank	Base-Base	Base	Windrow	Included	SFP	0.00497	kg O3 eq
	Effluent release	Base-Base	Base	Windrow	Included	SFP	0.00339	kg O3 eq
	ClearCove SCP	Base-Base	Base	Windrow	Included	SFP	0.00246	kg O3 eq
	Biosolids composting	Base-Base	Base	Windrow	Included	SFP	0.00111	kg O3 eq
	Control Building	Base-Base	Base	Windrow	Included	SFP	0.00054	kg O3 eq
	Land Application	Base-Base	Base	Windrow	Included	SFP	-0.00278	kg O3 eq
	Anaerobic Digestion	Base-Base	Base	Windrow	Included	SFP	-0.06194	kg O3 eq
	Waste Receiving	Base-Base	Base	Windrow	Included	WU	0.00023	m3 H2O
	Influent Pump Station	Base-Base	Base	Windrow	Included	WU	0.00018	m3 H2O
	Primary Clarification	Base-Base	Base	Windrow	Included	WU	0.00018	m3 H2O
	Aeration Tanks	Base-Base	Base	Windrow	Included	WU	0.00016	m3 H2O
	Control Building	Base-Base	Base	Windrow	Included	WU	0.00015	m3 H2O
	Effluent release	Base-Base	Base	Windrow	Included	WU	-0.03703	m3 H2O
	Pre-Anoxic & Swing tank	Base-Base	Base	Windrow	Included	WU	4.31921e-05	m3 H2O
	Gravity Belt Thickener	Base-Base	Base	Windrow	Included	WU	3.04081e-05	m3 H2O
	Belt filter press	Base-Base	Base	Windrow	Included	WU	2.19411e-05	m3 H2O
	Wet Well	Base-Base	Base	Windrow	Included	WU	1.75069e-05	m3 H2O
	Anaerobic Digestion	Base-Base	Base	Windrow	Included	WU	1.21043e-05	m3 H2O
	Blend Tank	Base-Base	Base	Windrow	Included	WU	7.01795e-06	m3 H2O
	Wastewater collection	Base-Base	Base	Windrow	Included	WU	5.06089e-06	m3 H2O
	Biosolids composting	Base-Base	Base	Windrow	Included	WU	1.06952e-06	m3 H2O
	ClearCove SCP	Base-Base	Base	Windrow	Included	WU	7.6697e-07	m3 H2O
	Land Application	Base-Base	Base	Windrow	Included	WU	-0.00115	m3 H2O
	Waste Receiving	Base-Base	Base	Windrow	Included	FDP	0.07917	kg oil eq
	Aeration Tanks	Base-Base	Base	Windrow	Included	FDP	0.06359	kg oil eq
	Primary Clarification	Base-Base	Base	Windrow	Included	FDP	0.02105	kg oil eq
	Pre-Anoxic & Swing tank	Base-Base	Base	Windrow	Included	FDP	0.01592	kg oil eq
	Influent Pump Station	Base-Base	Base	Windrow	Included	FDP	0.01509	kg oil eq
	Wet Well	Base-Base	Base	Windrow	Included	FDP	0.01249	kg oil eq
	Gravity Belt Thickener	Base-Base	Base	Windrow	Included	FDP	0.00692	kg oil eq
	Belt filter press	Base-Base	Base	Windrow	Included	FDP	0.00581	kg oil eq
	Wastewater collection	Base-Base	Base	Windrow	Included	FDP	0.0045	kg oil eq
	Control Building	Base-Base	Base	Windrow	Included	FDP	0.0028	kg oil eq
	Effluent release	Base-Base	Base	Windrow	Included	FDP	0.00236	kg oil eq
	Blend Tank	Base-Base	Base	Windrow	Included	FDP	0.00192	kg oil eq
	ClearCove SCP	Base-Base	Base	Windrow	Included	FDP	0.00091	kg oil eq
	Biosolids composting	Base-Base	Base	Windrow	Included	FDP	0.00044	kg oil eq
	Land Application	Base-Base	Base	Windrow	Included	FDP	-0.00617	kg oil eq
	Anaerobic Digestion	Base-Base	Base	Windrow	Included	FDP	-0.04003	kg oil eq
	Aeration Tanks	Base-Base	Base	Windrow	Included	CED	3.53305	MJ
	Waste Receiving	Base-Base	Base	Windrow	Included	CED	3.49827	MJ
	Primary Clarification	Base-Base	Base	Windrow	Included	CED	1.16289	MJ
	Pre-Anoxic & Swing tank	Base-Base	Base	Windrow	Included	CED	0.88417	MJ
	Influent Pump Station	Base-Base	Base	Windrow	Included	CED	0.88297	MJ
	Wet Well	Base-Base	Base	Windrow	Included	CED	0.69645	MJ
	Gravity Belt Thickener	Base-Base	Base	Windrow	Included	CED	0.33404	MJ
	Belt filter press	Base-Base	Base	Windrow	Included	CED	0.28834	MJ
	Wastewater collection	Base-Base	Base	Windrow	Included	CED	0.25606	MJ
	Control Building	Base-Base	Base	Windrow	Included	CED	0.14599	MJ
	Effluent release	Base-Base	Base	Windrow	Included	CED	0.13321	MJ
	Blend Tank	Base-Base	Base	Windrow	Included	CED	0.10638	MJ
	ClearCove SCP	Base-Base	Base	Windrow	Included	CED	0.05093	MJ
	Biosolids composting	Base-Base	Base	Windrow	Included	CED	0.02065	MJ
	Land Application	Base-Base	Base	Windrow	Included	CED	-0.44338	MJ
	Anaerobic Digestion	Base-Base	Base	Windrow	Included	CED	-1.99752	MJ
	Biosolids composting	Base-High	Base	Windrow	Included	GCCP	0.68415	kg CO2 eq
	Pre-Anoxic & Swing tank	Base-High	Base	Windrow	Included	GCCP	0.20883	kg CO2 eq
	Aeration Tanks	Base-High	Base	Windrow	Included	GCCP	0.16822	kg CO2 eq
	Waste Receiving	Base-High	Base	Windrow	Included	GCCP	0.10241	kg CO2 eq
	Primary Clarification	Base-High	Base	Windrow	Included	GCCP	0.05708	kg CO2 eq
	Effluent release	Base-High	Base	Windrow	Included	GCCP	0.05264	kg CO2 eq
	Influent Pump Station	Base-High	Base	Windrow	Included	GCCP	0.0505	kg CO2 eq
	Wet Well	Base-High	Base	Windrow	Included	GCCP	0.03326	kg CO2 eq
	Gravity Belt Thickener	Base-High	Base	Windrow	Included	GCCP	0.01455	kg CO2 eq
	Wastewater collection	Base-High	Base	Windrow	Included	GCCP	0.01351	kg CO2 eq
	Belt filter press	Base-High	Base	Windrow	Included	GCCP	0.01231	kg CO2 eq
	Control Building	Base-High	Base	Windrow	Included	GCCP	0.0083	kg CO2 eq
	Blend Tank	Base-High	Base	Windrow	Included	GCCP	0.00504	kg CO2 eq
	ClearCove SCP	Base-High	Base	Windrow	Included	GCCP	0.00241	kg CO2 eq
	Land Application	Base-High	Base	Windrow	Included	GCCP	-0.4412	kg CO2 eq
	Anaerobic Digestion	Base-High	Base	Windrow	Included	GCCP	-0.44909	kg CO2 eq
	Effluent release	Base-High	Base	Windrow	Included	EP	0.01161	kg N eq
	Land Application	Base-High	Base	Windrow	Included	EP	0.00195	kg N eq
	Aeration Tanks	Base-High	Base	Windrow	Included	EP	0.00055	kg N eq
	Biosolids composting	Base-High	Base	Windrow	Included	EP	0.00033	kg N eq
	Influent Pump Station	Base-High	Base	Windrow	Included	EP	0.00025	kg N eq
	Primary Clarification	Base-High	Base	Windrow	Included	EP	0.0002	kg N eq
	Waste Receiving	Base-High	Base	Windrow	Included	EP	0.00016	kg N eq
	Pre-Anoxic & Swing tank	Base-High	Base	Windrow	Included	EP	0.00014	kg N eq
	Wet Well	Base-High	Base	Windrow	Included	EP	0.00011	kg N eq
	Gravity Belt Thickener	Base-High	Base	Windrow	Included	EP	6.05903e-05	kg N eq
	Belt filter press	Base-High	Base	Windrow	Included	EP	4.87915e-05	kg N eq
	Wastewater collection	Base-High	Base	Windrow	Included	EP	3.75598e-05	kg N eq
	Control Building	Base-High	Base	Windrow	Included	EP	3.68746e-05	kg N eq
	Blend Tank	Base-High	Base	Windrow	Included	EP	1.62157e-05	kg N eq
	ClearCove SCP	Base-High	Base	Windrow	Included	EP	7.75672e-06	kg N eq
	Anaerobic Digestion	Base-High	Base	Windrow	Included	EP	-0.0012	kg N eq
	Aeration Tanks	Base-High	Base	Windrow	Included	AP	0.01722	kg SO2 eq
	Biosolids composting	Base-High	Base	Windrow	Included	AP	0.00529	kg SO2 eq
	Primary Clarification	Base-High	Base	Windrow	Included	AP	0.00498	kg SO2 eq
	Pre-Anoxic & Swing tank	Base-High	Base	Windrow	Included	AP	0.00433	kg SO2 eq
	Wet Well	Base-High	Base	Windrow	Included	AP	0.00345	kg SO2 eq
	Land Application	Base-High	Base	Windrow	Included	AP	0.00254	kg SO2 eq
	Waste Receiving	Base-High	Base	Windrow	Included	AP	0.00238	kg SO2 eq
	Influent Pump Station	Base-High	Base	Windrow	Included	AP	0.00207	kg SO2 eq
	Wastewater collection	Base-High	Base	Windrow	Included	AP	0.00123	kg SO2 eq
	Belt filter press	Base-High	Base	Windrow	Included	AP	0.00074	kg SO2 eq
	Gravity Belt Thickener	Base-High	Base	Windrow	Included	AP	0.0007	kg SO2 eq
	Blend Tank	Base-High	Base	Windrow	Included	AP	0.00052	kg SO2 eq
	Effluent release	Base-High	Base	Windrow	Included	AP	0.00035	kg SO2 eq
	ClearCove SCP	Base-High	Base	Windrow	Included	AP	0.00026	kg SO2 eq
	Control Building	Base-High	Base	Windrow	Included	AP	4.03547e-05	kg SO2 eq
	Anaerobic Digestion	Base-High	Base	Windrow	Included	AP	-0.03887	kg SO2 eq
	Aeration Tanks	Base-High	Base	Windrow	Included	PMFP	0.00233	kg PM2.5 eq
	Primary Clarification	Base-High	Base	Windrow	Included	PMFP	0.00068	kg PM2.5 eq
	Pre-Anoxic & Swing tank	Base-High	Base	Windrow	Included	PMFP	0.00059	kg PM2.5 eq
	Wet Well	Base-High	Base	Windrow	Included	PMFP	0.00047	kg PM2.5 eq
	Waste Receiving	Base-High	Base	Windrow	Included	PMFP	0.0003	kg PM2.5 eq
	Influent Pump Station	Base-High	Base	Windrow	Included	PMFP	0.00027	kg PM2.5 eq
	Biosolids composting	Base-High	Base	Windrow	Included	PMFP	0.00019	kg PM2.5 eq
	Wastewater collection	Base-High	Base	Windrow	Included	PMFP	0.00017	kg PM2.5 eq
	Belt filter press	Base-High	Base	Windrow	Included	PMFP	0.0001	kg PM2.5 eq
	Gravity Belt Thickener	Base-High	Base	Windrow	Included	PMFP	9.51538e-05	kg PM2.5 eq
	Blend Tank	Base-High	Base	Windrow	Included	PMFP	6.99422e-05	kg PM2.5 eq
	Effluent release	Base-High	Base	Windrow	Included	PMFP	4.99741e-05	kg PM2.5 eq
	Land Application	Base-High	Base	Windrow	Included	PMFP	4.12794e-05	kg PM2.5 eq
	ClearCove SCP	Base-High	Base	Windrow	Included	PMFP	3.45622e-05	kg PM2.5 eq
	Control Building	Base-High	Base	Windrow	Included	PMFP	8.8213e-06	kg PM2.5 eq
	Anaerobic Digestion	Base-High	Base	Windrow	Included	PMFP	-0.00524	kg PM2.5 eq
	Aeration Tanks	Base-High	Base	Windrow	Included	SFP	0.16577	kg O3 eq
	Primary Clarification	Base-High	Base	Windrow	Included	SFP	0.04807	kg O3 eq
	Pre-Anoxic & Swing tank	Base-High	Base	Windrow	Included	SFP	0.04178	kg O3 eq
	Wet Well	Base-High	Base	Windrow	Included	SFP	0.03313	kg O3 eq
	Waste Receiving	Base-High	Base	Windrow	Included	SFP	0.02795	kg O3 eq
	Influent Pump Station	Base-High	Base	Windrow	Included	SFP	0.0194	kg O3 eq
	Wastewater collection	Base-High	Base	Windrow	Included	SFP	0.01192	kg O3 eq
	Belt filter press	Base-High	Base	Windrow	Included	SFP	0.00708	kg O3 eq
	Gravity Belt Thickener	Base-High	Base	Windrow	Included	SFP	0.00665	kg O3 eq
	Blend Tank	Base-High	Base	Windrow	Included	SFP	0.00497	kg O3 eq
	Effluent release	Base-High	Base	Windrow	Included	SFP	0.00339	kg O3 eq
	ClearCove SCP	Base-High	Base	Windrow	Included	SFP	0.00246	kg O3 eq
	Biosolids composting	Base-High	Base	Windrow	Included	SFP	0.00104	kg O3 eq
	Control Building	Base-High	Base	Windrow	Included	SFP	0.00054	kg O3 eq
	Land Application	Base-High	Base	Windrow	Included	SFP	-0.00265	kg O3 eq
	Anaerobic Digestion	Base-High	Base	Windrow	Included	SFP	-0.37367	kg O3 eq
	Waste Receiving	Base-High	Base	Windrow	Included	WU	0.00023	m3 H2O
	Influent Pump Station	Base-High	Base	Windrow	Included	WU	0.00018	m3 H2O
	Primary Clarification	Base-High	Base	Windrow	Included	WU	0.00018	m3 H2O
	Aeration Tanks	Base-High	Base	Windrow	Included	WU	0.00016	m3 H2O
	Control Building	Base-High	Base	Windrow	Included	WU	0.00015	m3 H2O
	Effluent release	Base-High	Base	Windrow	Included	WU	-0.03703	m3 H2O
	Pre-Anoxic & Swing tank	Base-High	Base	Windrow	Included	WU	4.31921e-05	m3 H2O
	Gravity Belt Thickener	Base-High	Base	Windrow	Included	WU	3.04081e-05	m3 H2O
	Belt filter press	Base-High	Base	Windrow	Included	WU	2.11356e-05	m3 H2O
	Wet Well	Base-High	Base	Windrow	Included	WU	1.75069e-05	m3 H2O
	Blend Tank	Base-High	Base	Windrow	Included	WU	7.01795e-06	m3 H2O
	Wastewater collection	Base-High	Base	Windrow	Included	WU	5.06089e-06	m3 H2O
	Biosolids composting	Base-High	Base	Windrow	Included	WU	1.03293e-06	m3 H2O
	ClearCove SCP	Base-High	Base	Windrow	Included	WU	7.6697e-07	m3 H2O
	Anaerobic Digestion	Base-High	Base	Windrow	Included	WU	-9.31629e-05	m3 H2O
	Land Application	Base-High	Base	Windrow	Included	WU	-0.0011	m3 H2O
	Waste Receiving	Base-High	Base	Windrow	Included	FDP	0.07917	kg oil eq
	Aeration Tanks	Base-High	Base	Windrow	Included	FDP	0.06359	kg oil eq
	Primary Clarification	Base-High	Base	Windrow	Included	FDP	0.02105	kg oil eq
	Pre-Anoxic & Swing tank	Base-High	Base	Windrow	Included	FDP	0.01592	kg oil eq
	Influent Pump Station	Base-High	Base	Windrow	Included	FDP	0.01509	kg oil eq
	Wet Well	Base-High	Base	Windrow	Included	FDP	0.01249	kg oil eq
	Gravity Belt Thickener	Base-High	Base	Windrow	Included	FDP	0.00692	kg oil eq
	Belt filter press	Base-High	Base	Windrow	Included	FDP	0.0056	kg oil eq
	Wastewater collection	Base-High	Base	Windrow	Included	FDP	0.0045	kg oil eq
	Control Building	Base-High	Base	Windrow	Included	FDP	0.0028	kg oil eq
	Effluent release	Base-High	Base	Windrow	Included	FDP	0.00236	kg oil eq
	Blend Tank	Base-High	Base	Windrow	Included	FDP	0.00192	kg oil eq
	ClearCove SCP	Base-High	Base	Windrow	Included	FDP	0.00091	kg oil eq
	Biosolids composting	Base-High	Base	Windrow	Included	FDP	0.00043	kg oil eq
	Land Application	Base-High	Base	Windrow	Included	FDP	-0.00588	kg oil eq
	Anaerobic Digestion	Base-High	Base	Windrow	Included	FDP	-0.22373	kg oil eq
	Aeration Tanks	Base-High	Base	Windrow	Included	CED	3.53305	MJ
	Waste Receiving	Base-High	Base	Windrow	Included	CED	3.49827	MJ
	Primary Clarification	Base-High	Base	Windrow	Included	CED	1.16289	MJ
	Pre-Anoxic & Swing tank	Base-High	Base	Windrow	Included	CED	0.88417	MJ
	Influent Pump Station	Base-High	Base	Windrow	Included	CED	0.88297	MJ
	Wet Well	Base-High	Base	Windrow	Included	CED	0.69645	MJ
	Gravity Belt Thickener	Base-High	Base	Windrow	Included	CED	0.33404	MJ
	Belt filter press	Base-High	Base	Windrow	Included	CED	0.27775	MJ
	Wastewater collection	Base-High	Base	Windrow	Included	CED	0.25606	MJ
	Control Building	Base-High	Base	Windrow	Included	CED	0.14599	MJ
	Effluent release	Base-High	Base	Windrow	Included	CED	0.13321	MJ
	Blend Tank	Base-High	Base	Windrow	Included	CED	0.10638	MJ
	ClearCove SCP	Base-High	Base	Windrow	Included	CED	0.05093	MJ
	Biosolids composting	Base-High	Base	Windrow	Included	CED	0.02001	MJ
	Land Application	Base-High	Base	Windrow	Included	CED	-0.42221	MJ
	Anaerobic Digestion	Base-High	Base	Windrow	Included	CED	-11.3126	MJ
	Biosolids composting	Base-Low	Base	Windrow	Included	GCCP	0.79921	kg CO2 eq
	Pre-Anoxic & Swing tank	Base-Low	Base	Windrow	Included	GCCP	0.20883	kg CO2 eq
	Anaerobic Digestion	Base-Low	Base	Windrow	Included	GCCP	0.17545	kg CO2 eq
	Aeration Tanks	Base-Low	Base	Windrow	Included	GCCP	0.16822	kg CO2 eq
	Waste Receiving	Base-Low	Base	Windrow	Included	GCCP	0.10241	kg CO2 eq
	Primary Clarification	Base-Low	Base	Windrow	Included	GCCP	0.05708	kg CO2 eq
	Effluent release	Base-Low	Base	Windrow	Included	GCCP	0.05264	kg CO2 eq
	Influent Pump Station	Base-Low	Base	Windrow	Included	GCCP	0.0505	kg CO2 eq
	Wet Well	Base-Low	Base	Windrow	Included	GCCP	0.03326	kg CO2 eq
	Gravity Belt Thickener	Base-Low	Base	Windrow	Included	GCCP	0.01455	kg CO2 eq
	Belt filter press	Base-Low	Base	Windrow	Included	GCCP	0.01418	kg CO2 eq
	Wastewater collection	Base-Low	Base	Windrow	Included	GCCP	0.01351	kg CO2 eq
	Control Building	Base-Low	Base	Windrow	Included	GCCP	0.0083	kg CO2 eq
	Blend Tank	Base-Low	Base	Windrow	Included	GCCP	0.00504	kg CO2 eq
	ClearCove SCP	Base-Low	Base	Windrow	Included	GCCP	0.00241	kg CO2 eq
	Land Application	Base-Low	Base	Windrow	Included	GCCP	-0.52127	kg CO2 eq
	Effluent release	Base-Low	Base	Windrow	Included	EP	0.01161	kg N eq
	Land Application	Base-Low	Base	Windrow	Included	EP	0.00228	kg N eq
	Aeration Tanks	Base-Low	Base	Windrow	Included	EP	0.00055	kg N eq
	Biosolids composting	Base-Low	Base	Windrow	Included	EP	0.00039	kg N eq
	Influent Pump Station	Base-Low	Base	Windrow	Included	EP	0.00025	kg N eq
	Primary Clarification	Base-Low	Base	Windrow	Included	EP	0.0002	kg N eq
	Waste Receiving	Base-Low	Base	Windrow	Included	EP	0.00016	kg N eq
	Pre-Anoxic & Swing tank	Base-Low	Base	Windrow	Included	EP	0.00014	kg N eq
	Wet Well	Base-Low	Base	Windrow	Included	EP	0.00011	kg N eq
	Anaerobic Digestion	Base-Low	Base	Windrow	Included	EP	9.17983e-05	kg N eq
	Gravity Belt Thickener	Base-Low	Base	Windrow	Included	EP	6.05903e-05	kg N eq
	Belt filter press	Base-Low	Base	Windrow	Included	EP	5.62289e-05	kg N eq
	Wastewater collection	Base-Low	Base	Windrow	Included	EP	3.75598e-05	kg N eq
	Control Building	Base-Low	Base	Windrow	Included	EP	3.68746e-05	kg N eq
	Blend Tank	Base-Low	Base	Windrow	Included	EP	1.62157e-05	kg N eq
	ClearCove SCP	Base-Low	Base	Windrow	Included	EP	7.75672e-06	kg N eq
	Aeration Tanks	Base-Low	Base	Windrow	Included	CED	3.53305	MJ
	Waste Receiving	Base-Low	Base	Windrow	Included	CED	3.49827	MJ
	Anaerobic Digestion	Base-Low	Base	Windrow	Included	CED	2.73322	MJ
	Primary Clarification	Base-Low	Base	Windrow	Included	CED	1.16289	MJ
	Pre-Anoxic & Swing tank	Base-Low	Base	Windrow	Included	CED	0.88417	MJ
	Influent Pump Station	Base-Low	Base	Windrow	Included	CED	0.88297	MJ
	Wet Well	Base-Low	Base	Windrow	Included	CED	0.69645	MJ
	Gravity Belt Thickener	Base-Low	Base	Windrow	Included	CED	0.33404	MJ
	Belt filter press	Base-Low	Base	Windrow	Included	CED	0.32009	MJ
	Wastewater collection	Base-Low	Base	Windrow	Included	CED	0.25606	MJ
	Control Building	Base-Low	Base	Windrow	Included	CED	0.14599	MJ
	Effluent release	Base-Low	Base	Windrow	Included	CED	0.13321	MJ
	Blend Tank	Base-Low	Base	Windrow	Included	CED	0.10638	MJ
	ClearCove SCP	Base-Low	Base	Windrow	Included	CED	0.05093	MJ
	Biosolids composting	Base-Low	Base	Windrow	Included	CED	0.02292	MJ
	Land Application	Base-Low	Base	Windrow	Included	CED	-0.49231	MJ
	Aeration Tanks	Base-Low	Base	Windrow	Included	AP	0.01722	kg SO2 eq
	Biosolids composting	Base-Low	Base	Windrow	Included	AP	0.00615	kg SO2 eq
	Primary Clarification	Base-Low	Base	Windrow	Included	AP	0.00498	kg SO2 eq
	Pre-Anoxic & Swing tank	Base-Low	Base	Windrow	Included	AP	0.00433	kg SO2 eq
	Wet Well	Base-Low	Base	Windrow	Included	AP	0.00345	kg SO2 eq
	Land Application	Base-Low	Base	Windrow	Included	AP	0.00296	kg SO2 eq
	Anaerobic Digestion	Base-Low	Base	Windrow	Included	AP	0.0026	kg SO2 eq
	Waste Receiving	Base-Low	Base	Windrow	Included	AP	0.00238	kg SO2 eq
	Influent Pump Station	Base-Low	Base	Windrow	Included	AP	0.00207	kg SO2 eq
	Wastewater collection	Base-Low	Base	Windrow	Included	AP	0.00123	kg SO2 eq
	Belt filter press	Base-Low	Base	Windrow	Included	AP	0.00086	kg SO2 eq
	Gravity Belt Thickener	Base-Low	Base	Windrow	Included	AP	0.0007	kg SO2 eq
	Blend Tank	Base-Low	Base	Windrow	Included	AP	0.00052	kg SO2 eq
	Effluent release	Base-Low	Base	Windrow	Included	AP	0.00035	kg SO2 eq
	ClearCove SCP	Base-Low	Base	Windrow	Included	AP	0.00026	kg SO2 eq
	Control Building	Base-Low	Base	Windrow	Included	AP	4.03547e-05	kg SO2 eq
	Aeration Tanks	Base-Low	Base	Windrow	Included	PMFP	0.00233	kg PM2.5 eq
	Primary Clarification	Base-Low	Base	Windrow	Included	PMFP	0.00068	kg PM2.5 eq
	Pre-Anoxic & Swing tank	Base-Low	Base	Windrow	Included	PMFP	0.00059	kg PM2.5 eq
	Wet Well	Base-Low	Base	Windrow	Included	PMFP	0.00047	kg PM2.5 eq
	Anaerobic Digestion	Base-Low	Base	Windrow	Included	PMFP	0.00034	kg PM2.5 eq
	Waste Receiving	Base-Low	Base	Windrow	Included	PMFP	0.0003	kg PM2.5 eq
	Influent Pump Station	Base-Low	Base	Windrow	Included	PMFP	0.00027	kg PM2.5 eq
	Biosolids composting	Base-Low	Base	Windrow	Included	PMFP	0.00022	kg PM2.5 eq
	Wastewater collection	Base-Low	Base	Windrow	Included	PMFP	0.00017	kg PM2.5 eq
	Belt filter press	Base-Low	Base	Windrow	Included	PMFP	0.00012	kg PM2.5 eq
	Gravity Belt Thickener	Base-Low	Base	Windrow	Included	PMFP	9.51538e-05	kg PM2.5 eq
	Blend Tank	Base-Low	Base	Windrow	Included	PMFP	6.99422e-05	kg PM2.5 eq
	Effluent release	Base-Low	Base	Windrow	Included	PMFP	4.99741e-05	kg PM2.5 eq
	Land Application	Base-Low	Base	Windrow	Included	PMFP	4.80095e-05	kg PM2.5 eq
	ClearCove SCP	Base-Low	Base	Windrow	Included	PMFP	3.45622e-05	kg PM2.5 eq
	Control Building	Base-Low	Base	Windrow	Included	PMFP	8.8213e-06	kg PM2.5 eq
	Aeration Tanks	Base-Low	Base	Windrow	Included	SFP	0.16577	kg O3 eq
	Primary Clarification	Base-Low	Base	Windrow	Included	SFP	0.04807	kg O3 eq
	Pre-Anoxic & Swing tank	Base-Low	Base	Windrow	Included	SFP	0.04178	kg O3 eq
	Wet Well	Base-Low	Base	Windrow	Included	SFP	0.03313	kg O3 eq
	Waste Receiving	Base-Low	Base	Windrow	Included	SFP	0.02795	kg O3 eq
	Anaerobic Digestion	Base-Low	Base	Windrow	Included	SFP	0.02489	kg O3 eq
	Influent Pump Station	Base-Low	Base	Windrow	Included	SFP	0.0194	kg O3 eq
	Wastewater collection	Base-Low	Base	Windrow	Included	SFP	0.01192	kg O3 eq
	Belt filter press	Base-Low	Base	Windrow	Included	SFP	0.00816	kg O3 eq
	Gravity Belt Thickener	Base-Low	Base	Windrow	Included	SFP	0.00665	kg O3 eq
	Blend Tank	Base-Low	Base	Windrow	Included	SFP	0.00497	kg O3 eq
	Effluent release	Base-Low	Base	Windrow	Included	SFP	0.00339	kg O3 eq
	ClearCove SCP	Base-Low	Base	Windrow	Included	SFP	0.00246	kg O3 eq
	Biosolids composting	Base-Low	Base	Windrow	Included	SFP	0.00121	kg O3 eq
	Control Building	Base-Low	Base	Windrow	Included	SFP	0.00054	kg O3 eq
	Land Application	Base-Low	Base	Windrow	Included	SFP	-0.00309	kg O3 eq
	Waste Receiving	Base-Low	Base	Windrow	Included	WU	0.00023	m3 H2O
	Influent Pump Station	Base-Low	Base	Windrow	Included	WU	0.00018	m3 H2O
	Primary Clarification	Base-Low	Base	Windrow	Included	WU	0.00018	m3 H2O
	Aeration Tanks	Base-Low	Base	Windrow	Included	WU	0.00016	m3 H2O
	Control Building	Base-Low	Base	Windrow	Included	WU	0.00015	m3 H2O
	Effluent release	Base-Low	Base	Windrow	Included	WU	-0.03703	m3 H2O
	Anaerobic Digestion	Base-Low	Base	Windrow	Included	WU	4.73329e-05	m3 H2O
	Pre-Anoxic & Swing tank	Base-Low	Base	Windrow	Included	WU	4.31921e-05	m3 H2O
	Gravity Belt Thickener	Base-Low	Base	Windrow	Included	WU	3.04081e-05	m3 H2O
	Belt filter press	Base-Low	Base	Windrow	Included	WU	2.43574e-05	m3 H2O
	Wet Well	Base-Low	Base	Windrow	Included	WU	1.75069e-05	m3 H2O
	Blend Tank	Base-Low	Base	Windrow	Included	WU	7.01795e-06	m3 H2O
	Wastewater collection	Base-Low	Base	Windrow	Included	WU	5.06089e-06	m3 H2O
	Biosolids composting	Base-Low	Base	Windrow	Included	WU	1.1873e-06	m3 H2O
	ClearCove SCP	Base-Low	Base	Windrow	Included	WU	7.6697e-07	m3 H2O
	Land Application	Base-Low	Base	Windrow	Included	WU	-0.00128	m3 H2O
	Waste Receiving	Base-Low	Base	Windrow	Included	FDP	0.07917	kg oil eq
	Aeration Tanks	Base-Low	Base	Windrow	Included	FDP	0.06359	kg oil eq
	Anaerobic Digestion	Base-Low	Base	Windrow	Included	FDP	0.06181	kg oil eq
	Primary Clarification	Base-Low	Base	Windrow	Included	FDP	0.02105	kg oil eq
	Pre-Anoxic & Swing tank	Base-Low	Base	Windrow	Included	FDP	0.01592	kg oil eq
	Influent Pump Station	Base-Low	Base	Windrow	Included	FDP	0.01509	kg oil eq
	Wet Well	Base-Low	Base	Windrow	Included	FDP	0.01249	kg oil eq
	Gravity Belt Thickener	Base-Low	Base	Windrow	Included	FDP	0.00692	kg oil eq
	Belt filter press	Base-Low	Base	Windrow	Included	FDP	0.00645	kg oil eq
	Wastewater collection	Base-Low	Base	Windrow	Included	FDP	0.0045	kg oil eq
	Control Building	Base-Low	Base	Windrow	Included	FDP	0.0028	kg oil eq
	Effluent release	Base-Low	Base	Windrow	Included	FDP	0.00236	kg oil eq
	Blend Tank	Base-Low	Base	Windrow	Included	FDP	0.00192	kg oil eq
	ClearCove SCP	Base-Low	Base	Windrow	Included	FDP	0.00091	kg oil eq
	Biosolids composting	Base-Low	Base	Windrow	Included	FDP	0.00049	kg oil eq
	Land Application	Base-Low	Base	Windrow	Included	FDP	-0.00685	kg oil eq
	Biosolids composting	High-Base	Base	Windrow	Included	GCCP	1.41476	kg CO2 eq
	Pre-Anoxic & Swing tank	High-Base	Base	Windrow	Included	GCCP	0.21356	kg CO2 eq
	Aeration Tanks	High-Base	Base	Windrow	Included	GCCP	0.16822	kg CO2 eq
	Waste Receiving	High-Base	Base	Windrow	Included	GCCP	0.14685	kg CO2 eq
	Primary Clarification	High-Base	Base	Windrow	Included	GCCP	0.05708	kg CO2 eq
	Effluent release	High-Base	Base	Windrow	Included	GCCP	0.05264	kg CO2 eq
	Influent Pump Station	High-Base	Base	Windrow	Included	GCCP	0.0505	kg CO2 eq
	Wet Well	High-Base	Base	Windrow	Included	GCCP	0.03326	kg CO2 eq
	Belt filter press	High-Base	Base	Windrow	Included	GCCP	0.02412	kg CO2 eq
	Gravity Belt Thickener	High-Base	Base	Windrow	Included	GCCP	0.01455	kg CO2 eq
	Wastewater collection	High-Base	Base	Windrow	Included	GCCP	0.01351	kg CO2 eq
	Control Building	High-Base	Base	Windrow	Included	GCCP	0.0083	kg CO2 eq
	Blend Tank	High-Base	Base	Windrow	Included	GCCP	0.00504	kg CO2 eq
	ClearCove SCP	High-Base	Base	Windrow	Included	GCCP	0.00241	kg CO2 eq
	Anaerobic Digestion	High-Base	Base	Windrow	Included	GCCP	-0.57099	kg CO2 eq
	Land Application	High-Base	Base	Windrow	Included	GCCP	-0.89548	kg CO2 eq
	Effluent release	High-Base	Base	Windrow	Included	EP	0.01161	kg N eq
	Land Application	High-Base	Base	Windrow	Included	EP	0.00389	kg N eq
	Biosolids composting	High-Base	Base	Windrow	Included	EP	0.00069	kg N eq
	Aeration Tanks	High-Base	Base	Windrow	Included	EP	0.00055	kg N eq
	Influent Pump Station	High-Base	Base	Windrow	Included	EP	0.00025	kg N eq
	Waste Receiving	High-Base	Base	Windrow	Included	EP	0.00022	kg N eq
	Primary Clarification	High-Base	Base	Windrow	Included	EP	0.0002	kg N eq
	Pre-Anoxic & Swing tank	High-Base	Base	Windrow	Included	EP	0.00014	kg N eq
	Wet Well	High-Base	Base	Windrow	Included	EP	0.00011	kg N eq
	Belt filter press	High-Base	Base	Windrow	Included	EP	9.56018e-05	kg N eq
	Gravity Belt Thickener	High-Base	Base	Windrow	Included	EP	6.05903e-05	kg N eq
	Wastewater collection	High-Base	Base	Windrow	Included	EP	3.75598e-05	kg N eq
	Control Building	High-Base	Base	Windrow	Included	EP	3.68746e-05	kg N eq
	Blend Tank	High-Base	Base	Windrow	Included	EP	1.62157e-05	kg N eq
	ClearCove SCP	High-Base	Base	Windrow	Included	EP	7.75672e-06	kg N eq
	Anaerobic Digestion	High-Base	Base	Windrow	Included	EP	-0.00138	kg N eq
	Waste Receiving	High-Base	Base	Windrow	Included	CED	5.13934	MJ
	Aeration Tanks	High-Base	Base	Windrow	Included	CED	3.53305	MJ
	Primary Clarification	High-Base	Base	Windrow	Included	CED	1.16289	MJ
	Pre-Anoxic & Swing tank	High-Base	Base	Windrow	Included	CED	0.89064	MJ
	Influent Pump Station	High-Base	Base	Windrow	Included	CED	0.88297	MJ
	Wet Well	High-Base	Base	Windrow	Included	CED	0.69645	MJ
	Belt filter press	High-Base	Base	Windrow	Included	CED	0.54423	MJ
	Gravity Belt Thickener	High-Base	Base	Windrow	Included	CED	0.33404	MJ
	Wastewater collection	High-Base	Base	Windrow	Included	CED	0.25606	MJ
	Control Building	High-Base	Base	Windrow	Included	CED	0.14599	MJ
	Effluent release	High-Base	Base	Windrow	Included	CED	0.13321	MJ
	Blend Tank	High-Base	Base	Windrow	Included	CED	0.10638	MJ
	ClearCove SCP	High-Base	Base	Windrow	Included	CED	0.05093	MJ
	Biosolids composting	High-Base	Base	Windrow	Included	CED	0.03882	MJ
	Land Application	High-Base	Base	Windrow	Included	CED	-0.8408	MJ
	Anaerobic Digestion	High-Base	Base	Windrow	Included	CED	-14.1798	MJ
	Aeration Tanks	High-Base	Base	Windrow	Included	AP	0.01722	kg SO2 eq
	Biosolids composting	High-Base	Base	Windrow	Included	AP	0.01095	kg SO2 eq
	Land Application	High-Base	Base	Windrow	Included	AP	0.00505	kg SO2 eq
	Primary Clarification	High-Base	Base	Windrow	Included	AP	0.00498	kg SO2 eq
	Pre-Anoxic & Swing tank	High-Base	Base	Windrow	Included	AP	0.00436	kg SO2 eq
	Wet Well	High-Base	Base	Windrow	Included	AP	0.00345	kg SO2 eq
	Waste Receiving	High-Base	Base	Windrow	Included	AP	0.0027	kg SO2 eq
	Influent Pump Station	High-Base	Base	Windrow	Included	AP	0.00207	kg SO2 eq
	Belt filter press	High-Base	Base	Windrow	Included	AP	0.00146	kg SO2 eq
	Wastewater collection	High-Base	Base	Windrow	Included	AP	0.00123	kg SO2 eq
	Gravity Belt Thickener	High-Base	Base	Windrow	Included	AP	0.0007	kg SO2 eq
	Blend Tank	High-Base	Base	Windrow	Included	AP	0.00052	kg SO2 eq
	Effluent release	High-Base	Base	Windrow	Included	AP	0.00035	kg SO2 eq
	ClearCove SCP	High-Base	Base	Windrow	Included	AP	0.00026	kg SO2 eq
	Control Building	High-Base	Base	Windrow	Included	AP	4.03547e-05	kg SO2 eq
	Anaerobic Digestion	High-Base	Base	Windrow	Included	AP	-0.0447	kg SO2 eq
	Aeration Tanks	High-Base	Base	Windrow	Included	PMFP	0.00233	kg PM2.5 eq
	Primary Clarification	High-Base	Base	Windrow	Included	PMFP	0.00068	kg PM2.5 eq
	Pre-Anoxic & Swing tank	High-Base	Base	Windrow	Included	PMFP	0.00059	kg PM2.5 eq
	Wet Well	High-Base	Base	Windrow	Included	PMFP	0.00047	kg PM2.5 eq
	Biosolids composting	High-Base	Base	Windrow	Included	PMFP	0.00039	kg PM2.5 eq
	Waste Receiving	High-Base	Base	Windrow	Included	PMFP	0.00033	kg PM2.5 eq
	Influent Pump Station	High-Base	Base	Windrow	Included	PMFP	0.00027	kg PM2.5 eq
	Belt filter press	High-Base	Base	Windrow	Included	PMFP	0.0002	kg PM2.5 eq
	Wastewater collection	High-Base	Base	Windrow	Included	PMFP	0.00017	kg PM2.5 eq
	Gravity Belt Thickener	High-Base	Base	Windrow	Included	PMFP	9.51538e-05	kg PM2.5 eq
	Land Application	High-Base	Base	Windrow	Included	PMFP	8.18467e-05	kg PM2.5 eq
	Blend Tank	High-Base	Base	Windrow	Included	PMFP	6.99422e-05	kg PM2.5 eq
	Effluent release	High-Base	Base	Windrow	Included	PMFP	4.99741e-05	kg PM2.5 eq
	ClearCove SCP	High-Base	Base	Windrow	Included	PMFP	3.45622e-05	kg PM2.5 eq
	Control Building	High-Base	Base	Windrow	Included	PMFP	8.8213e-06	kg PM2.5 eq
	Anaerobic Digestion	High-Base	Base	Windrow	Included	PMFP	-0.00602	kg PM2.5 eq
	Aeration Tanks	High-Base	Base	Windrow	Included	SFP	0.16577	kg O3 eq
	Primary Clarification	High-Base	Base	Windrow	Included	SFP	0.04807	kg O3 eq
	Pre-Anoxic & Swing tank	High-Base	Base	Windrow	Included	SFP	0.04209	kg O3 eq
	Waste Receiving	High-Base	Base	Windrow	Included	SFP	0.03376	kg O3 eq
	Wet Well	High-Base	Base	Windrow	Included	SFP	0.03313	kg O3 eq
	Influent Pump Station	High-Base	Base	Windrow	Included	SFP	0.0194	kg O3 eq
	Belt filter press	High-Base	Base	Windrow	Included	SFP	0.01387	kg O3 eq
	Wastewater collection	High-Base	Base	Windrow	Included	SFP	0.01192	kg O3 eq
	Gravity Belt Thickener	High-Base	Base	Windrow	Included	SFP	0.00665	kg O3 eq
	Blend Tank	High-Base	Base	Windrow	Included	SFP	0.00497	kg O3 eq
	Effluent release	High-Base	Base	Windrow	Included	SFP	0.00339	kg O3 eq
	ClearCove SCP	High-Base	Base	Windrow	Included	SFP	0.00246	kg O3 eq
	Biosolids composting	High-Base	Base	Windrow	Included	SFP	0.00212	kg O3 eq
	Control Building	High-Base	Base	Windrow	Included	SFP	0.00054	kg O3 eq
	Land Application	High-Base	Base	Windrow	Included	SFP	-0.00528	kg O3 eq
	Anaerobic Digestion	High-Base	Base	Windrow	Included	SFP	-0.42966	kg O3 eq
	Waste Receiving	High-Base	Base	Windrow	Included	WU	0.00034	m3 H2O
	Influent Pump Station	High-Base	Base	Windrow	Included	WU	0.00018	m3 H2O
	Primary Clarification	High-Base	Base	Windrow	Included	WU	0.00018	m3 H2O
	Aeration Tanks	High-Base	Base	Windrow	Included	WU	0.00016	m3 H2O
	Control Building	High-Base	Base	Windrow	Included	WU	0.00015	m3 H2O
	Effluent release	High-Base	Base	Windrow	Included	WU	-0.03703	m3 H2O
	Pre-Anoxic & Swing tank	High-Base	Base	Windrow	Included	WU	4.32894e-05	m3 H2O
	Belt filter press	High-Base	Base	Windrow	Included	WU	4.14131e-05	m3 H2O
	Gravity Belt Thickener	High-Base	Base	Windrow	Included	WU	3.04081e-05	m3 H2O
	Wet Well	High-Base	Base	Windrow	Included	WU	1.75069e-05	m3 H2O
	Blend Tank	High-Base	Base	Windrow	Included	WU	7.01795e-06	m3 H2O
	Wastewater collection	High-Base	Base	Windrow	Included	WU	5.06089e-06	m3 H2O
	Biosolids composting	High-Base	Base	Windrow	Included	WU	2.01519e-06	m3 H2O
	ClearCove SCP	High-Base	Base	Windrow	Included	WU	7.6697e-07	m3 H2O
	Anaerobic Digestion	High-Base	Base	Windrow	Included	WU	-0.00012	m3 H2O
	Land Application	High-Base	Base	Windrow	Included	WU	-0.00219	m3 H2O
	Waste Receiving	High-Base	Base	Windrow	Included	FDP	0.11719	kg oil eq
	Aeration Tanks	High-Base	Base	Windrow	Included	FDP	0.06359	kg oil eq
	Primary Clarification	High-Base	Base	Windrow	Included	FDP	0.02105	kg oil eq
	Pre-Anoxic & Swing tank	High-Base	Base	Windrow	Included	FDP	0.01604	kg oil eq
	Influent Pump Station	High-Base	Base	Windrow	Included	FDP	0.01509	kg oil eq
	Wet Well	High-Base	Base	Windrow	Included	FDP	0.01249	kg oil eq
	Belt filter press	High-Base	Base	Windrow	Included	FDP	0.01097	kg oil eq
	Gravity Belt Thickener	High-Base	Base	Windrow	Included	FDP	0.00692	kg oil eq
	Wastewater collection	High-Base	Base	Windrow	Included	FDP	0.0045	kg oil eq
	Control Building	High-Base	Base	Windrow	Included	FDP	0.0028	kg oil eq
	Effluent release	High-Base	Base	Windrow	Included	FDP	0.00236	kg oil eq
	Blend Tank	High-Base	Base	Windrow	Included	FDP	0.00192	kg oil eq
	ClearCove SCP	High-Base	Base	Windrow	Included	FDP	0.00091	kg oil eq
	Biosolids composting	High-Base	Base	Windrow	Included	FDP	0.00083	kg oil eq
	Land Application	High-Base	Base	Windrow	Included	FDP	-0.0117	kg oil eq
	Anaerobic Digestion	High-Base	Base	Windrow	Included	FDP	-0.28505	kg oil eq
	Biosolids composting	High-High	Base	Windrow	Included	GCCP	1.29776	kg CO2 eq
	Pre-Anoxic & Swing tank	High-High	Base	Windrow	Included	GCCP	0.21356	kg CO2 eq
	Aeration Tanks	High-High	Base	Windrow	Included	GCCP	0.16822	kg CO2 eq
	Waste Receiving	High-High	Base	Windrow	Included	GCCP	0.14685	kg CO2 eq
	Primary Clarification	High-High	Base	Windrow	Included	GCCP	0.05708	kg CO2 eq
	Effluent release	High-High	Base	Windrow	Included	GCCP	0.05264	kg CO2 eq
	Influent Pump Station	High-High	Base	Windrow	Included	GCCP	0.0505	kg CO2 eq
	Wet Well	High-High	Base	Windrow	Included	GCCP	0.03326	kg CO2 eq
	Belt filter press	High-High	Base	Windrow	Included	GCCP	0.02288	kg CO2 eq
	Gravity Belt Thickener	High-High	Base	Windrow	Included	GCCP	0.01455	kg CO2 eq
	Wastewater collection	High-High	Base	Windrow	Included	GCCP	0.01351	kg CO2 eq
	Control Building	High-High	Base	Windrow	Included	GCCP	0.0083	kg CO2 eq
	Blend Tank	High-High	Base	Windrow	Included	GCCP	0.00504	kg CO2 eq
	ClearCove SCP	High-High	Base	Windrow	Included	GCCP	0.00241	kg CO2 eq
	Land Application	High-High	Base	Windrow	Included	GCCP	-0.83601	kg CO2 eq
	Anaerobic Digestion	High-High	Base	Windrow	Included	GCCP	-0.88992	kg CO2 eq
	Effluent release	High-High	Base	Windrow	Included	EP	0.01161	kg N eq
	Land Application	High-High	Base	Windrow	Included	EP	0.00366	kg N eq
	Biosolids composting	High-High	Base	Windrow	Included	EP	0.00063	kg N eq
	Aeration Tanks	High-High	Base	Windrow	Included	EP	0.00055	kg N eq
	Influent Pump Station	High-High	Base	Windrow	Included	EP	0.00025	kg N eq
	Waste Receiving	High-High	Base	Windrow	Included	EP	0.00022	kg N eq
	Primary Clarification	High-High	Base	Windrow	Included	EP	0.0002	kg N eq
	Pre-Anoxic & Swing tank	High-High	Base	Windrow	Included	EP	0.00014	kg N eq
	Wet Well	High-High	Base	Windrow	Included	EP	0.00011	kg N eq
	Belt filter press	High-High	Base	Windrow	Included	EP	9.07108e-05	kg N eq
	Gravity Belt Thickener	High-High	Base	Windrow	Included	EP	6.05903e-05	kg N eq
	Wastewater collection	High-High	Base	Windrow	Included	EP	3.75598e-05	kg N eq
	Control Building	High-High	Base	Windrow	Included	EP	3.68746e-05	kg N eq
	Blend Tank	High-High	Base	Windrow	Included	EP	1.62157e-05	kg N eq
	ClearCove SCP	High-High	Base	Windrow	Included	EP	7.75672e-06	kg N eq
	Anaerobic Digestion	High-High	Base	Windrow	Included	EP	-0.00296	kg N eq
	Aeration Tanks	High-High	Base	Windrow	Included	AP	0.01722	kg SO2 eq
	Biosolids composting	High-High	Base	Windrow	Included	AP	0.01002	kg SO2 eq
	Primary Clarification	High-High	Base	Windrow	Included	AP	0.00498	kg SO2 eq
	Land Application	High-High	Base	Windrow	Included	AP	0.00476	kg SO2 eq
	Pre-Anoxic & Swing tank	High-High	Base	Windrow	Included	AP	0.00436	kg SO2 eq
	Wet Well	High-High	Base	Windrow	Included	AP	0.00345	kg SO2 eq
	Waste Receiving	High-High	Base	Windrow	Included	AP	0.0027	kg SO2 eq
	Influent Pump Station	High-High	Base	Windrow	Included	AP	0.00207	kg SO2 eq
	Belt filter press	High-High	Base	Windrow	Included	AP	0.00138	kg SO2 eq
	Wastewater collection	High-High	Base	Windrow	Included	AP	0.00123	kg SO2 eq
	Gravity Belt Thickener	High-High	Base	Windrow	Included	AP	0.0007	kg SO2 eq
	Blend Tank	High-High	Base	Windrow	Included	AP	0.00052	kg SO2 eq
	Effluent release	High-High	Base	Windrow	Included	AP	0.00035	kg SO2 eq
	ClearCove SCP	High-High	Base	Windrow	Included	AP	0.00026	kg SO2 eq
	Control Building	High-High	Base	Windrow	Included	AP	4.03547e-05	kg SO2 eq
	Anaerobic Digestion	High-High	Base	Windrow	Included	AP	-0.09684	kg SO2 eq
	Aeration Tanks	High-High	Base	Windrow	Included	PMFP	0.00233	kg PM2.5 eq
	Primary Clarification	High-High	Base	Windrow	Included	PMFP	0.00068	kg PM2.5 eq
	Pre-Anoxic & Swing tank	High-High	Base	Windrow	Included	PMFP	0.00059	kg PM2.5 eq
	Wet Well	High-High	Base	Windrow	Included	PMFP	0.00047	kg PM2.5 eq
	Biosolids composting	High-High	Base	Windrow	Included	PMFP	0.00036	kg PM2.5 eq
	Waste Receiving	High-High	Base	Windrow	Included	PMFP	0.00033	kg PM2.5 eq
	Influent Pump Station	High-High	Base	Windrow	Included	PMFP	0.00027	kg PM2.5 eq
	Belt filter press	High-High	Base	Windrow	Included	PMFP	0.00019	kg PM2.5 eq
	Wastewater collection	High-High	Base	Windrow	Included	PMFP	0.00017	kg PM2.5 eq
	Gravity Belt Thickener	High-High	Base	Windrow	Included	PMFP	9.51538e-05	kg PM2.5 eq
	Land Application	High-High	Base	Windrow	Included	PMFP	7.72535e-05	kg PM2.5 eq
	Blend Tank	High-High	Base	Windrow	Included	PMFP	6.99422e-05	kg PM2.5 eq
	Effluent release	High-High	Base	Windrow	Included	PMFP	4.99741e-05	kg PM2.5 eq
	ClearCove SCP	High-High	Base	Windrow	Included	PMFP	3.45622e-05	kg PM2.5 eq
	Control Building	High-High	Base	Windrow	Included	PMFP	8.8213e-06	kg PM2.5 eq
	Anaerobic Digestion	High-High	Base	Windrow	Included	PMFP	-0.01309	kg PM2.5 eq
	Aeration Tanks	High-High	Base	Windrow	Included	SFP	0.16577	kg O3 eq
	Primary Clarification	High-High	Base	Windrow	Included	SFP	0.04807	kg O3 eq
	Pre-Anoxic & Swing tank	High-High	Base	Windrow	Included	SFP	0.04209	kg O3 eq
	Waste Receiving	High-High	Base	Windrow	Included	SFP	0.03376	kg O3 eq
	Wet Well	High-High	Base	Windrow	Included	SFP	0.03313	kg O3 eq
	Influent Pump Station	High-High	Base	Windrow	Included	SFP	0.0194	kg O3 eq
	Belt filter press	High-High	Base	Windrow	Included	SFP	0.01316	kg O3 eq
	Wastewater collection	High-High	Base	Windrow	Included	SFP	0.01192	kg O3 eq
	Gravity Belt Thickener	High-High	Base	Windrow	Included	SFP	0.00665	kg O3 eq
	Blend Tank	High-High	Base	Windrow	Included	SFP	0.00497	kg O3 eq
	Effluent release	High-High	Base	Windrow	Included	SFP	0.00339	kg O3 eq
	ClearCove SCP	High-High	Base	Windrow	Included	SFP	0.00246	kg O3 eq
	Biosolids composting	High-High	Base	Windrow	Included	SFP	0.00196	kg O3 eq
	Control Building	High-High	Base	Windrow	Included	SFP	0.00054	kg O3 eq
	Land Application	High-High	Base	Windrow	Included	SFP	-0.00497	kg O3 eq
	Anaerobic Digestion	High-High	Base	Windrow	Included	SFP	-0.93126	kg O3 eq
	Waste Receiving	High-High	Base	Windrow	Included	WU	0.00034	m3 H2O
	Influent Pump Station	High-High	Base	Windrow	Included	WU	0.00018	m3 H2O
	Primary Clarification	High-High	Base	Windrow	Included	WU	0.00018	m3 H2O
	Aeration Tanks	High-High	Base	Windrow	Included	WU	0.00016	m3 H2O
	Control Building	High-High	Base	Windrow	Included	WU	0.00015	m3 H2O
	Effluent release	High-High	Base	Windrow	Included	WU	-0.03703	m3 H2O
	Pre-Anoxic & Swing tank	High-High	Base	Windrow	Included	WU	4.32894e-05	m3 H2O
	Belt filter press	High-High	Base	Windrow	Included	WU	3.92944e-05	m3 H2O
	Gravity Belt Thickener	High-High	Base	Windrow	Included	WU	3.04081e-05	m3 H2O
	Wet Well	High-High	Base	Windrow	Included	WU	1.75069e-05	m3 H2O
	Blend Tank	High-High	Base	Windrow	Included	WU	7.01795e-06	m3 H2O
	Wastewater collection	High-High	Base	Windrow	Included	WU	5.06089e-06	m3 H2O
	Biosolids composting	High-High	Base	Windrow	Included	WU	1.91722e-06	m3 H2O
	ClearCove SCP	High-High	Base	Windrow	Included	WU	7.6697e-07	m3 H2O
	Anaerobic Digestion	High-High	Base	Windrow	Included	WU	-0.00027	m3 H2O
	Land Application	High-High	Base	Windrow	Included	WU	-0.00206	m3 H2O
	Waste Receiving	High-High	Base	Windrow	Included	FDP	0.11719	kg oil eq
	Aeration Tanks	High-High	Base	Windrow	Included	FDP	0.06359	kg oil eq
	Primary Clarification	High-High	Base	Windrow	Included	FDP	0.02105	kg oil eq
	Pre-Anoxic & Swing tank	High-High	Base	Windrow	Included	FDP	0.01604	kg oil eq
	Influent Pump Station	High-High	Base	Windrow	Included	FDP	0.01509	kg oil eq
	Wet Well	High-High	Base	Windrow	Included	FDP	0.01249	kg oil eq
	Belt filter press	High-High	Base	Windrow	Included	FDP	0.01041	kg oil eq
	Gravity Belt Thickener	High-High	Base	Windrow	Included	FDP	0.00692	kg oil eq
	Wastewater collection	High-High	Base	Windrow	Included	FDP	0.0045	kg oil eq
	Control Building	High-High	Base	Windrow	Included	FDP	0.0028	kg oil eq
	Effluent release	High-High	Base	Windrow	Included	FDP	0.00236	kg oil eq
	Blend Tank	High-High	Base	Windrow	Included	FDP	0.00192	kg oil eq
	ClearCove SCP	High-High	Base	Windrow	Included	FDP	0.00091	kg oil eq
	Biosolids composting	High-High	Base	Windrow	Included	FDP	0.00079	kg oil eq
	Land Application	High-High	Base	Windrow	Included	FDP	-0.01102	kg oil eq
	Anaerobic Digestion	High-High	Base	Windrow	Included	FDP	-0.44776	kg oil eq
	Waste Receiving	High-High	Base	Windrow	Included	CED	5.13934	MJ
	Aeration Tanks	High-High	Base	Windrow	Included	CED	3.53305	MJ
	Primary Clarification	High-High	Base	Windrow	Included	CED	1.16289	MJ
	Pre-Anoxic & Swing tank	High-High	Base	Windrow	Included	CED	0.89064	MJ
	Influent Pump Station	High-High	Base	Windrow	Included	CED	0.88297	MJ
	Wet Well	High-High	Base	Windrow	Included	CED	0.69645	MJ
	Belt filter press	High-High	Base	Windrow	Included	CED	0.51639	MJ
	Gravity Belt Thickener	High-High	Base	Windrow	Included	CED	0.33404	MJ
	Wastewater collection	High-High	Base	Windrow	Included	CED	0.25606	MJ
	Control Building	High-High	Base	Windrow	Included	CED	0.14599	MJ
	Effluent release	High-High	Base	Windrow	Included	CED	0.13321	MJ
	Blend Tank	High-High	Base	Windrow	Included	CED	0.10638	MJ
	ClearCove SCP	High-High	Base	Windrow	Included	CED	0.05093	MJ
	Biosolids composting	High-High	Base	Windrow	Included	CED	0.03707	MJ
	Land Application	High-High	Base	Windrow	Included	CED	-0.7919	MJ
	Anaerobic Digestion	High-High	Base	Windrow	Included	CED	-23.5671	MJ
	Biosolids composting	High-Low	Base	Windrow	Included	GCCP	1.54584	kg CO2 eq
	Pre-Anoxic & Swing tank	High-Low	Base	Windrow	Included	GCCP	0.21356	kg CO2 eq
	Aeration Tanks	High-Low	Base	Windrow	Included	GCCP	0.16822	kg CO2 eq
	Waste Receiving	High-Low	Base	Windrow	Included	GCCP	0.14685	kg CO2 eq
	Primary Clarification	High-Low	Base	Windrow	Included	GCCP	0.05708	kg CO2 eq
	Effluent release	High-Low	Base	Windrow	Included	GCCP	0.05264	kg CO2 eq
	Influent Pump Station	High-Low	Base	Windrow	Included	GCCP	0.0505	kg CO2 eq
	Wet Well	High-Low	Base	Windrow	Included	GCCP	0.03326	kg CO2 eq
	Belt filter press	High-Low	Base	Windrow	Included	GCCP	0.02782	kg CO2 eq
	Gravity Belt Thickener	High-Low	Base	Windrow	Included	GCCP	0.01455	kg CO2 eq
	Wastewater collection	High-Low	Base	Windrow	Included	GCCP	0.01351	kg CO2 eq
	Control Building	High-Low	Base	Windrow	Included	GCCP	0.0083	kg CO2 eq
	Blend Tank	High-Low	Base	Windrow	Included	GCCP	0.00504	kg CO2 eq
	ClearCove SCP	High-Low	Base	Windrow	Included	GCCP	0.00241	kg CO2 eq
	Anaerobic Digestion	High-Low	Base	Windrow	Included	GCCP	-0.17056	kg CO2 eq
	Land Application	High-Low	Base	Windrow	Included	GCCP	-0.99224	kg CO2 eq
	Effluent release	High-Low	Base	Windrow	Included	EP	0.01161	kg N eq
	Land Application	High-Low	Base	Windrow	Included	EP	0.0044	kg N eq
	Biosolids composting	High-Low	Base	Windrow	Included	EP	0.00075	kg N eq
	Aeration Tanks	High-Low	Base	Windrow	Included	EP	0.00055	kg N eq
	Influent Pump Station	High-Low	Base	Windrow	Included	EP	0.00025	kg N eq
	Waste Receiving	High-Low	Base	Windrow	Included	EP	0.00022	kg N eq
	Primary Clarification	High-Low	Base	Windrow	Included	EP	0.0002	kg N eq
	Pre-Anoxic & Swing tank	High-Low	Base	Windrow	Included	EP	0.00014	kg N eq
	Belt filter press	High-Low	Base	Windrow	Included	EP	0.00011	kg N eq
	Wet Well	High-Low	Base	Windrow	Included	EP	0.00011	kg N eq
	Gravity Belt Thickener	High-Low	Base	Windrow	Included	EP	6.05903e-05	kg N eq
	Wastewater collection	High-Low	Base	Windrow	Included	EP	3.75598e-05	kg N eq
	Control Building	High-Low	Base	Windrow	Included	EP	3.68746e-05	kg N eq
	Blend Tank	High-Low	Base	Windrow	Included	EP	1.62157e-05	kg N eq
	ClearCove SCP	High-Low	Base	Windrow	Included	EP	7.75672e-06	kg N eq
	Anaerobic Digestion	High-Low	Base	Windrow	Included	EP	-0.00041	kg N eq
	Waste Receiving	High-Low	Base	Windrow	Included	CED	5.13934	MJ
	Aeration Tanks	High-Low	Base	Windrow	Included	CED	3.53305	MJ
	Primary Clarification	High-Low	Base	Windrow	Included	CED	1.16289	MJ
	Pre-Anoxic & Swing tank	High-Low	Base	Windrow	Included	CED	0.89064	MJ
	Influent Pump Station	High-Low	Base	Windrow	Included	CED	0.88297	MJ
	Wet Well	High-Low	Base	Windrow	Included	CED	0.69645	MJ
	Belt filter press	High-Low	Base	Windrow	Included	CED	0.62776	MJ
	Gravity Belt Thickener	High-Low	Base	Windrow	Included	CED	0.33404	MJ
	Wastewater collection	High-Low	Base	Windrow	Included	CED	0.25606	MJ
	Control Building	High-Low	Base	Windrow	Included	CED	0.14599	MJ
	Effluent release	High-Low	Base	Windrow	Included	CED	0.13321	MJ
	Blend Tank	High-Low	Base	Windrow	Included	CED	0.10638	MJ
	ClearCove SCP	High-Low	Base	Windrow	Included	CED	0.05093	MJ
	Biosolids composting	High-Low	Base	Windrow	Included	CED	0.04519	MJ
	Land Application	High-Low	Base	Windrow	Included	CED	-0.95125	MJ
	Anaerobic Digestion	High-Low	Base	Windrow	Included	CED	-4.79746	MJ
	Aeration Tanks	High-Low	Base	Windrow	Included	AP	0.01722	kg SO2 eq
	Biosolids composting	High-Low	Base	Windrow	Included	AP	0.01197	kg SO2 eq
	Land Application	High-Low	Base	Windrow	Included	AP	0.00572	kg SO2 eq
	Primary Clarification	High-Low	Base	Windrow	Included	AP	0.00498	kg SO2 eq
	Pre-Anoxic & Swing tank	High-Low	Base	Windrow	Included	AP	0.00436	kg SO2 eq
	Wet Well	High-Low	Base	Windrow	Included	AP	0.00345	kg SO2 eq
	Waste Receiving	High-Low	Base	Windrow	Included	AP	0.0027	kg SO2 eq
	Influent Pump Station	High-Low	Base	Windrow	Included	AP	0.00207	kg SO2 eq
	Belt filter press	High-Low	Base	Windrow	Included	AP	0.00168	kg SO2 eq
	Wastewater collection	High-Low	Base	Windrow	Included	AP	0.00123	kg SO2 eq
	Gravity Belt Thickener	High-Low	Base	Windrow	Included	AP	0.0007	kg SO2 eq
	Blend Tank	High-Low	Base	Windrow	Included	AP	0.00052	kg SO2 eq
	Effluent release	High-Low	Base	Windrow	Included	AP	0.00035	kg SO2 eq
	ClearCove SCP	High-Low	Base	Windrow	Included	AP	0.00026	kg SO2 eq
	Control Building	High-Low	Base	Windrow	Included	AP	4.03547e-05	kg SO2 eq
	Anaerobic Digestion	High-Low	Base	Windrow	Included	AP	-0.01325	kg SO2 eq
	Aeration Tanks	High-Low	Base	Windrow	Included	PMFP	0.00233	kg PM2.5 eq
	Primary Clarification	High-Low	Base	Windrow	Included	PMFP	0.00068	kg PM2.5 eq
	Pre-Anoxic & Swing tank	High-Low	Base	Windrow	Included	PMFP	0.00059	kg PM2.5 eq
	Wet Well	High-Low	Base	Windrow	Included	PMFP	0.00047	kg PM2.5 eq
	Biosolids composting	High-Low	Base	Windrow	Included	PMFP	0.00043	kg PM2.5 eq
	Waste Receiving	High-Low	Base	Windrow	Included	PMFP	0.00033	kg PM2.5 eq
	Influent Pump Station	High-Low	Base	Windrow	Included	PMFP	0.00027	kg PM2.5 eq
	Belt filter press	High-Low	Base	Windrow	Included	PMFP	0.00023	kg PM2.5 eq
	Wastewater collection	High-Low	Base	Windrow	Included	PMFP	0.00017	kg PM2.5 eq
	Gravity Belt Thickener	High-Low	Base	Windrow	Included	PMFP	9.51538e-05	kg PM2.5 eq
	Land Application	High-Low	Base	Windrow	Included	PMFP	9.29235e-05	kg PM2.5 eq
	Blend Tank	High-Low	Base	Windrow	Included	PMFP	6.99422e-05	kg PM2.5 eq
	Effluent release	High-Low	Base	Windrow	Included	PMFP	4.99741e-05	kg PM2.5 eq
	ClearCove SCP	High-Low	Base	Windrow	Included	PMFP	3.45622e-05	kg PM2.5 eq
	Control Building	High-Low	Base	Windrow	Included	PMFP	8.8213e-06	kg PM2.5 eq
	Anaerobic Digestion	High-Low	Base	Windrow	Included	PMFP	-0.00178	kg PM2.5 eq
	Aeration Tanks	High-Low	Base	Windrow	Included	SFP	0.16577	kg O3 eq
	Primary Clarification	High-Low	Base	Windrow	Included	SFP	0.04807	kg O3 eq
	Pre-Anoxic & Swing tank	High-Low	Base	Windrow	Included	SFP	0.04209	kg O3 eq
	Waste Receiving	High-Low	Base	Windrow	Included	SFP	0.03376	kg O3 eq
	Wet Well	High-Low	Base	Windrow	Included	SFP	0.03313	kg O3 eq
	Influent Pump Station	High-Low	Base	Windrow	Included	SFP	0.0194	kg O3 eq
	Belt filter press	High-Low	Base	Windrow	Included	SFP	0.01599	kg O3 eq
	Wastewater collection	High-Low	Base	Windrow	Included	SFP	0.01192	kg O3 eq
	Gravity Belt Thickener	High-Low	Base	Windrow	Included	SFP	0.00665	kg O3 eq
	Blend Tank	High-Low	Base	Windrow	Included	SFP	0.00497	kg O3 eq
	Effluent release	High-Low	Base	Windrow	Included	SFP	0.00339	kg O3 eq
	ClearCove SCP	High-Low	Base	Windrow	Included	SFP	0.00246	kg O3 eq
	Biosolids composting	High-Low	Base	Windrow	Included	SFP	0.00236	kg O3 eq
	Control Building	High-Low	Base	Windrow	Included	SFP	0.00054	kg O3 eq
	Land Application	High-Low	Base	Windrow	Included	SFP	-0.00597	kg O3 eq
	Anaerobic Digestion	High-Low	Base	Windrow	Included	SFP	-0.12725	kg O3 eq
	Waste Receiving	High-Low	Base	Windrow	Included	WU	0.00034	m3 H2O
	Influent Pump Station	High-Low	Base	Windrow	Included	WU	0.00018	m3 H2O
	Primary Clarification	High-Low	Base	Windrow	Included	WU	0.00018	m3 H2O
	Aeration Tanks	High-Low	Base	Windrow	Included	WU	0.00016	m3 H2O
	Control Building	High-Low	Base	Windrow	Included	WU	0.00015	m3 H2O
	Effluent release	High-Low	Base	Windrow	Included	WU	-0.03703	m3 H2O
	Belt filter press	High-Low	Base	Windrow	Included	WU	4.77692e-05	m3 H2O
	Pre-Anoxic & Swing tank	High-Low	Base	Windrow	Included	WU	4.32894e-05	m3 H2O
	Gravity Belt Thickener	High-Low	Base	Windrow	Included	WU	3.04081e-05	m3 H2O
	Wet Well	High-Low	Base	Windrow	Included	WU	1.75069e-05	m3 H2O
	Blend Tank	High-Low	Base	Windrow	Included	WU	7.01795e-06	m3 H2O
	Wastewater collection	High-Low	Base	Windrow	Included	WU	5.06089e-06	m3 H2O
	Biosolids composting	High-Low	Base	Windrow	Included	WU	2.3342e-06	m3 H2O
	ClearCove SCP	High-Low	Base	Windrow	Included	WU	7.6697e-07	m3 H2O
	Anaerobic Digestion	High-Low	Base	Windrow	Included	WU	-1.22975e-05	m3 H2O
	Land Application	High-Low	Base	Windrow	Included	WU	-0.00247	m3 H2O
	Waste Receiving	High-Low	Base	Windrow	Included	FDP	0.11719	kg oil eq
	Aeration Tanks	High-Low	Base	Windrow	Included	FDP	0.06359	kg oil eq
	Primary Clarification	High-Low	Base	Windrow	Included	FDP	0.02105	kg oil eq
	Pre-Anoxic & Swing tank	High-Low	Base	Windrow	Included	FDP	0.01604	kg oil eq
	Influent Pump Station	High-Low	Base	Windrow	Included	FDP	0.01509	kg oil eq
	Belt filter press	High-Low	Base	Windrow	Included	FDP	0.01266	kg oil eq
	Wet Well	High-Low	Base	Windrow	Included	FDP	0.01249	kg oil eq
	Gravity Belt Thickener	High-Low	Base	Windrow	Included	FDP	0.00692	kg oil eq
	Wastewater collection	High-Low	Base	Windrow	Included	FDP	0.0045	kg oil eq
	Control Building	High-Low	Base	Windrow	Included	FDP	0.0028	kg oil eq
	Effluent release	High-Low	Base	Windrow	Included	FDP	0.00236	kg oil eq
	Blend Tank	High-Low	Base	Windrow	Included	FDP	0.00192	kg oil eq
	Biosolids composting	High-Low	Base	Windrow	Included	FDP	0.00096	kg oil eq
	ClearCove SCP	High-Low	Base	Windrow	Included	FDP	0.00091	kg oil eq
	Land Application	High-Low	Base	Windrow	Included	FDP	-0.01324	kg oil eq
	Anaerobic Digestion	High-Low	Base	Windrow	Included	FDP	-0.09864	kg oil eq
	Biosolids composting	Medium-Base	Base	Windrow	Included	GCCP	1.01965	kg CO2 eq
	Pre-Anoxic & Swing tank	Medium-Base	Base	Windrow	Included	GCCP	0.21083	kg CO2 eq
	Aeration Tanks	Medium-Base	Base	Windrow	Included	GCCP	0.16822	kg CO2 eq
	Waste Receiving	Medium-Base	Base	Windrow	Included	GCCP	0.12355	kg CO2 eq
	Primary Clarification	Medium-Base	Base	Windrow	Included	GCCP	0.05708	kg CO2 eq
	Effluent release	Medium-Base	Base	Windrow	Included	GCCP	0.05264	kg CO2 eq
	Influent Pump Station	Medium-Base	Base	Windrow	Included	GCCP	0.0505	kg CO2 eq
	Wet Well	Medium-Base	Base	Windrow	Included	GCCP	0.03326	kg CO2 eq
	Belt filter press	Medium-Base	Base	Windrow	Included	GCCP	0.01764	kg CO2 eq
	Gravity Belt Thickener	Medium-Base	Base	Windrow	Included	GCCP	0.01455	kg CO2 eq
	Wastewater collection	Medium-Base	Base	Windrow	Included	GCCP	0.01351	kg CO2 eq
	Control Building	Medium-Base	Base	Windrow	Included	GCCP	0.0083	kg CO2 eq
	Blend Tank	Medium-Base	Base	Windrow	Included	GCCP	0.00504	kg CO2 eq
	ClearCove SCP	Medium-Base	Base	Windrow	Included	GCCP	0.00241	kg CO2 eq
	Anaerobic Digestion	Medium-Base	Base	Windrow	Included	GCCP	-0.36998	kg CO2 eq
	Land Application	Medium-Base	Base	Windrow	Included	GCCP	-0.64796	kg CO2 eq
	Effluent release	Medium-Base	Base	Windrow	Included	EP	0.01161	kg N eq
	Land Application	Medium-Base	Base	Windrow	Included	EP	0.00283	kg N eq
	Aeration Tanks	Medium-Base	Base	Windrow	Included	EP	0.00055	kg N eq
	Biosolids composting	Medium-Base	Base	Windrow	Included	EP	0.0005	kg N eq
	Influent Pump Station	Medium-Base	Base	Windrow	Included	EP	0.00025	kg N eq
	Primary Clarification	Medium-Base	Base	Windrow	Included	EP	0.0002	kg N eq
	Waste Receiving	Medium-Base	Base	Windrow	Included	EP	0.00019	kg N eq
	Pre-Anoxic & Swing tank	Medium-Base	Base	Windrow	Included	EP	0.00014	kg N eq
	Wet Well	Medium-Base	Base	Windrow	Included	EP	0.00011	kg N eq
	Belt filter press	Medium-Base	Base	Windrow	Included	EP	6.99221e-05	kg N eq
	Gravity Belt Thickener	Medium-Base	Base	Windrow	Included	EP	6.05903e-05	kg N eq
	Wastewater collection	Medium-Base	Base	Windrow	Included	EP	3.75598e-05	kg N eq
	Control Building	Medium-Base	Base	Windrow	Included	EP	3.68746e-05	kg N eq
	Blend Tank	Medium-Base	Base	Windrow	Included	EP	1.62157e-05	kg N eq
	ClearCove SCP	Medium-Base	Base	Windrow	Included	EP	7.75672e-06	kg N eq
	Anaerobic Digestion	Medium-Base	Base	Windrow	Included	EP	-0.00062	kg N eq
	Aeration Tanks	Medium-Base	Base	Windrow	Included	AP	0.01722	kg SO2 eq
	Biosolids composting	Medium-Base	Base	Windrow	Included	AP	0.00789	kg SO2 eq
	Primary Clarification	Medium-Base	Base	Windrow	Included	AP	0.00498	kg SO2 eq
	Pre-Anoxic & Swing tank	Medium-Base	Base	Windrow	Included	AP	0.00435	kg SO2 eq
	Land Application	Medium-Base	Base	Windrow	Included	AP	0.00368	kg SO2 eq
	Wet Well	Medium-Base	Base	Windrow	Included	AP	0.00345	kg SO2 eq
	Waste Receiving	Medium-Base	Base	Windrow	Included	AP	0.00253	kg SO2 eq
	Influent Pump Station	Medium-Base	Base	Windrow	Included	AP	0.00207	kg SO2 eq
	Wastewater collection	Medium-Base	Base	Windrow	Included	AP	0.00123	kg SO2 eq
	Belt filter press	Medium-Base	Base	Windrow	Included	AP	0.00107	kg SO2 eq
	Gravity Belt Thickener	Medium-Base	Base	Windrow	Included	AP	0.0007	kg SO2 eq
	Blend Tank	Medium-Base	Base	Windrow	Included	AP	0.00052	kg SO2 eq
	Effluent release	Medium-Base	Base	Windrow	Included	AP	0.00035	kg SO2 eq
	ClearCove SCP	Medium-Base	Base	Windrow	Included	AP	0.00026	kg SO2 eq
	Control Building	Medium-Base	Base	Windrow	Included	AP	4.03547e-05	kg SO2 eq
	Anaerobic Digestion	Medium-Base	Base	Windrow	Included	AP	-0.01972	kg SO2 eq
	Aeration Tanks	Medium-Base	Base	Windrow	Included	PMFP	0.00233	kg PM2.5 eq
	Primary Clarification	Medium-Base	Base	Windrow	Included	PMFP	0.00068	kg PM2.5 eq
	Pre-Anoxic & Swing tank	Medium-Base	Base	Windrow	Included	PMFP	0.00059	kg PM2.5 eq
	Wet Well	Medium-Base	Base	Windrow	Included	PMFP	0.00047	kg PM2.5 eq
	Waste Receiving	Medium-Base	Base	Windrow	Included	PMFP	0.00031	kg PM2.5 eq
	Biosolids composting	Medium-Base	Base	Windrow	Included	PMFP	0.00028	kg PM2.5 eq
	Influent Pump Station	Medium-Base	Base	Windrow	Included	PMFP	0.00027	kg PM2.5 eq
	Wastewater collection	Medium-Base	Base	Windrow	Included	PMFP	0.00017	kg PM2.5 eq
	Belt filter press	Medium-Base	Base	Windrow	Included	PMFP	0.00014	kg PM2.5 eq
	Gravity Belt Thickener	Medium-Base	Base	Windrow	Included	PMFP	9.51538e-05	kg PM2.5 eq
	Blend Tank	Medium-Base	Base	Windrow	Included	PMFP	6.99422e-05	kg PM2.5 eq
	Land Application	Medium-Base	Base	Windrow	Included	PMFP	5.9602e-05	kg PM2.5 eq
	Effluent release	Medium-Base	Base	Windrow	Included	PMFP	4.99741e-05	kg PM2.5 eq
	ClearCove SCP	Medium-Base	Base	Windrow	Included	PMFP	3.45622e-05	kg PM2.5 eq
	Control Building	Medium-Base	Base	Windrow	Included	PMFP	8.8213e-06	kg PM2.5 eq
	Anaerobic Digestion	Medium-Base	Base	Windrow	Included	PMFP	-0.00264	kg PM2.5 eq
	Aeration Tanks	Medium-Base	Base	Windrow	Included	SFP	0.16577	kg O3 eq
	Primary Clarification	Medium-Base	Base	Windrow	Included	SFP	0.04807	kg O3 eq
	Pre-Anoxic & Swing tank	Medium-Base	Base	Windrow	Included	SFP	0.04192	kg O3 eq
	Wet Well	Medium-Base	Base	Windrow	Included	SFP	0.03313	kg O3 eq
	Waste Receiving	Medium-Base	Base	Windrow	Included	SFP	0.03071	kg O3 eq
	Influent Pump Station	Medium-Base	Base	Windrow	Included	SFP	0.0194	kg O3 eq
	Wastewater collection	Medium-Base	Base	Windrow	Included	SFP	0.01192	kg O3 eq
	Belt filter press	Medium-Base	Base	Windrow	Included	SFP	0.01014	kg O3 eq
	Gravity Belt Thickener	Medium-Base	Base	Windrow	Included	SFP	0.00665	kg O3 eq
	Blend Tank	Medium-Base	Base	Windrow	Included	SFP	0.00497	kg O3 eq
	Effluent release	Medium-Base	Base	Windrow	Included	SFP	0.00339	kg O3 eq
	ClearCove SCP	Medium-Base	Base	Windrow	Included	SFP	0.00246	kg O3 eq
	Biosolids composting	Medium-Base	Base	Windrow	Included	SFP	0.00153	kg O3 eq
	Control Building	Medium-Base	Base	Windrow	Included	SFP	0.00054	kg O3 eq
	Land Application	Medium-Base	Base	Windrow	Included	SFP	-0.00384	kg O3 eq
	Anaerobic Digestion	Medium-Base	Base	Windrow	Included	SFP	-0.18936	kg O3 eq
	Waste Receiving	Medium-Base	Base	Windrow	Included	WU	0.00028	m3 H2O
	Influent Pump Station	Medium-Base	Base	Windrow	Included	WU	0.00018	m3 H2O
	Primary Clarification	Medium-Base	Base	Windrow	Included	WU	0.00018	m3 H2O
	Aeration Tanks	Medium-Base	Base	Windrow	Included	WU	0.00016	m3 H2O
	Control Building	Medium-Base	Base	Windrow	Included	WU	0.00015	m3 H2O
	Effluent release	Medium-Base	Base	Windrow	Included	WU	-0.03703	m3 H2O
	Pre-Anoxic & Swing tank	Medium-Base	Base	Windrow	Included	WU	4.32353e-05	m3 H2O
	Gravity Belt Thickener	Medium-Base	Base	Windrow	Included	WU	3.04081e-05	m3 H2O
	Belt filter press	Medium-Base	Base	Windrow	Included	WU	3.0289e-05	m3 H2O
	Wet Well	Medium-Base	Base	Windrow	Included	WU	1.75069e-05	m3 H2O
	Blend Tank	Medium-Base	Base	Windrow	Included	WU	7.01795e-06	m3 H2O
	Wastewater collection	Medium-Base	Base	Windrow	Included	WU	5.06089e-06	m3 H2O
	Biosolids composting	Medium-Base	Base	Windrow	Included	WU	1.47648e-06	m3 H2O
	ClearCove SCP	Medium-Base	Base	Windrow	Included	WU	7.6697e-07	m3 H2O
	Anaerobic Digestion	Medium-Base	Base	Windrow	Included	WU	-3.85914e-05	m3 H2O
	Land Application	Medium-Base	Base	Windrow	Included	WU	-0.00159	m3 H2O
	Waste Receiving	Medium-Base	Base	Windrow	Included	FDP	0.09726	kg oil eq
	Aeration Tanks	Medium-Base	Base	Windrow	Included	FDP	0.06359	kg oil eq
	Primary Clarification	Medium-Base	Base	Windrow	Included	FDP	0.02105	kg oil eq
	Pre-Anoxic & Swing tank	Medium-Base	Base	Windrow	Included	FDP	0.01598	kg oil eq
	Influent Pump Station	Medium-Base	Base	Windrow	Included	FDP	0.01509	kg oil eq
	Wet Well	Medium-Base	Base	Windrow	Included	FDP	0.01249	kg oil eq
	Belt filter press	Medium-Base	Base	Windrow	Included	FDP	0.00803	kg oil eq
	Gravity Belt Thickener	Medium-Base	Base	Windrow	Included	FDP	0.00692	kg oil eq
	Wastewater collection	Medium-Base	Base	Windrow	Included	FDP	0.0045	kg oil eq
	Control Building	Medium-Base	Base	Windrow	Included	FDP	0.0028	kg oil eq
	Effluent release	Medium-Base	Base	Windrow	Included	FDP	0.00236	kg oil eq
	Blend Tank	Medium-Base	Base	Windrow	Included	FDP	0.00192	kg oil eq
	ClearCove SCP	Medium-Base	Base	Windrow	Included	FDP	0.00091	kg oil eq
	Biosolids composting	Medium-Base	Base	Windrow	Included	FDP	0.00061	kg oil eq
	Land Application	Medium-Base	Base	Windrow	Included	FDP	-0.00851	kg oil eq
	Anaerobic Digestion	Medium-Base	Base	Windrow	Included	FDP	-0.18092	kg oil eq
	Waste Receiving	Medium-Base	Base	Windrow	Included	CED	4.27896	MJ
	Aeration Tanks	Medium-Base	Base	Windrow	Included	CED	3.53305	MJ
	Primary Clarification	Medium-Base	Base	Windrow	Included	CED	1.16289	MJ
	Pre-Anoxic & Swing tank	Medium-Base	Base	Windrow	Included	CED	0.88705	MJ
	Influent Pump Station	Medium-Base	Base	Windrow	Included	CED	0.88297	MJ
	Wet Well	Medium-Base	Base	Windrow	Included	CED	0.69645	MJ
	Belt filter press	Medium-Base	Base	Windrow	Included	CED	0.39804	MJ
	Gravity Belt Thickener	Medium-Base	Base	Windrow	Included	CED	0.33404	MJ
	Wastewater collection	Medium-Base	Base	Windrow	Included	CED	0.25606	MJ
	Control Building	Medium-Base	Base	Windrow	Included	CED	0.14599	MJ
	Effluent release	Medium-Base	Base	Windrow	Included	CED	0.13321	MJ
	Blend Tank	Medium-Base	Base	Windrow	Included	CED	0.10638	MJ
	ClearCove SCP	Medium-Base	Base	Windrow	Included	CED	0.05093	MJ
	Biosolids composting	Medium-Base	Base	Windrow	Included	CED	0.02851	MJ
	Land Application	Medium-Base	Base	Windrow	Included	CED	-0.61174	MJ
	Anaerobic Digestion	Medium-Base	Base	Windrow	Included	CED	-8.57889	MJ
	Biosolids composting	Medium-High	Base	Windrow	Included	GCCP	0.96086	kg CO2 eq
	Pre-Anoxic & Swing tank	Medium-High	Base	Windrow	Included	GCCP	0.21083	kg CO2 eq
	Aeration Tanks	Medium-High	Base	Windrow	Included	GCCP	0.16822	kg CO2 eq
	Waste Receiving	Medium-High	Base	Windrow	Included	GCCP	0.12355	kg CO2 eq
	Primary Clarification	Medium-High	Base	Windrow	Included	GCCP	0.05708	kg CO2 eq
	Effluent release	Medium-High	Base	Windrow	Included	GCCP	0.05264	kg CO2 eq
	Influent Pump Station	Medium-High	Base	Windrow	Included	GCCP	0.0505	kg CO2 eq
	Wet Well	Medium-High	Base	Windrow	Included	GCCP	0.03326	kg CO2 eq
	Belt filter press	Medium-High	Base	Windrow	Included	GCCP	0.01688	kg CO2 eq
	Gravity Belt Thickener	Medium-High	Base	Windrow	Included	GCCP	0.01455	kg CO2 eq
	Wastewater collection	Medium-High	Base	Windrow	Included	GCCP	0.01351	kg CO2 eq
	Control Building	Medium-High	Base	Windrow	Included	GCCP	0.0083	kg CO2 eq
	Blend Tank	Medium-High	Base	Windrow	Included	GCCP	0.00504	kg CO2 eq
	ClearCove SCP	Medium-High	Base	Windrow	Included	GCCP	0.00241	kg CO2 eq
	Anaerobic Digestion	Medium-High	Base	Windrow	Included	GCCP	-0.60108	kg CO2 eq
	Land Application	Medium-High	Base	Windrow	Included	GCCP	-0.62451	kg CO2 eq
	Effluent release	Medium-High	Base	Windrow	Included	EP	0.01161	kg N eq
	Land Application	Medium-High	Base	Windrow	Included	EP	0.00272	kg N eq
	Aeration Tanks	Medium-High	Base	Windrow	Included	EP	0.00055	kg N eq
	Biosolids composting	Medium-High	Base	Windrow	Included	EP	0.00047	kg N eq
	Influent Pump Station	Medium-High	Base	Windrow	Included	EP	0.00025	kg N eq
	Primary Clarification	Medium-High	Base	Windrow	Included	EP	0.0002	kg N eq
	Waste Receiving	Medium-High	Base	Windrow	Included	EP	0.00019	kg N eq
	Pre-Anoxic & Swing tank	Medium-High	Base	Windrow	Included	EP	0.00014	kg N eq
	Wet Well	Medium-High	Base	Windrow	Included	EP	0.00011	kg N eq
	Belt filter press	Medium-High	Base	Windrow	Included	EP	6.69155e-05	kg N eq
	Gravity Belt Thickener	Medium-High	Base	Windrow	Included	EP	6.05903e-05	kg N eq
	Wastewater collection	Medium-High	Base	Windrow	Included	EP	3.75598e-05	kg N eq
	Control Building	Medium-High	Base	Windrow	Included	EP	3.68746e-05	kg N eq
	Blend Tank	Medium-High	Base	Windrow	Included	EP	1.62157e-05	kg N eq
	ClearCove SCP	Medium-High	Base	Windrow	Included	EP	7.75672e-06	kg N eq
	Anaerobic Digestion	Medium-High	Base	Windrow	Included	EP	-0.00178	kg N eq
	Waste Receiving	Medium-High	Base	Windrow	Included	CED	4.27896	MJ
	Aeration Tanks	Medium-High	Base	Windrow	Included	CED	3.53305	MJ
	Primary Clarification	Medium-High	Base	Windrow	Included	CED	1.16289	MJ
	Pre-Anoxic & Swing tank	Medium-High	Base	Windrow	Included	CED	0.88705	MJ
	Influent Pump Station	Medium-High	Base	Windrow	Included	CED	0.88297	MJ
	Wet Well	Medium-High	Base	Windrow	Included	CED	0.69645	MJ
	Belt filter press	Medium-High	Base	Windrow	Included	CED	0.38093	MJ
	Gravity Belt Thickener	Medium-High	Base	Windrow	Included	CED	0.33404	MJ
	Wastewater collection	Medium-High	Base	Windrow	Included	CED	0.25606	MJ
	Control Building	Medium-High	Base	Windrow	Included	CED	0.14599	MJ
	Effluent release	Medium-High	Base	Windrow	Included	CED	0.13321	MJ
	Blend Tank	Medium-High	Base	Windrow	Included	CED	0.10638	MJ
	ClearCove SCP	Medium-High	Base	Windrow	Included	CED	0.05093	MJ
	Biosolids composting	Medium-High	Base	Windrow	Included	CED	0.02721	MJ
	Land Application	Medium-High	Base	Windrow	Included	CED	-0.5877	MJ
	Anaerobic Digestion	Medium-High	Base	Windrow	Included	CED	-15.4718	MJ
	Aeration Tanks	Medium-High	Base	Windrow	Included	AP	0.01722	kg SO2 eq
	Biosolids composting	Medium-High	Base	Windrow	Included	AP	0.00739	kg SO2 eq
	Primary Clarification	Medium-High	Base	Windrow	Included	AP	0.00498	kg SO2 eq
	Pre-Anoxic & Swing tank	Medium-High	Base	Windrow	Included	AP	0.00435	kg SO2 eq
	Land Application	Medium-High	Base	Windrow	Included	AP	0.00353	kg SO2 eq
	Wet Well	Medium-High	Base	Windrow	Included	AP	0.00345	kg SO2 eq
	Waste Receiving	Medium-High	Base	Windrow	Included	AP	0.00253	kg SO2 eq
	Influent Pump Station	Medium-High	Base	Windrow	Included	AP	0.00207	kg SO2 eq
	Wastewater collection	Medium-High	Base	Windrow	Included	AP	0.00123	kg SO2 eq
	Belt filter press	Medium-High	Base	Windrow	Included	AP	0.00102	kg SO2 eq
	Gravity Belt Thickener	Medium-High	Base	Windrow	Included	AP	0.0007	kg SO2 eq
	Blend Tank	Medium-High	Base	Windrow	Included	AP	0.00052	kg SO2 eq
	Effluent release	Medium-High	Base	Windrow	Included	AP	0.00035	kg SO2 eq
	ClearCove SCP	Medium-High	Base	Windrow	Included	AP	0.00026	kg SO2 eq
	Control Building	Medium-High	Base	Windrow	Included	AP	4.03547e-05	kg SO2 eq
	Anaerobic Digestion	Medium-High	Base	Windrow	Included	AP	-0.05801	kg SO2 eq
	Aeration Tanks	Medium-High	Base	Windrow	Included	PMFP	0.00233	kg PM2.5 eq
	Primary Clarification	Medium-High	Base	Windrow	Included	PMFP	0.00068	kg PM2.5 eq
	Pre-Anoxic & Swing tank	Medium-High	Base	Windrow	Included	PMFP	0.00059	kg PM2.5 eq
	Wet Well	Medium-High	Base	Windrow	Included	PMFP	0.00047	kg PM2.5 eq
	Waste Receiving	Medium-High	Base	Windrow	Included	PMFP	0.00031	kg PM2.5 eq
	Influent Pump Station	Medium-High	Base	Windrow	Included	PMFP	0.00027	kg PM2.5 eq
	Biosolids composting	Medium-High	Base	Windrow	Included	PMFP	0.00027	kg PM2.5 eq
	Wastewater collection	Medium-High	Base	Windrow	Included	PMFP	0.00017	kg PM2.5 eq
	Belt filter press	Medium-High	Base	Windrow	Included	PMFP	0.00014	kg PM2.5 eq
	Gravity Belt Thickener	Medium-High	Base	Windrow	Included	PMFP	9.51538e-05	kg PM2.5 eq
	Blend Tank	Medium-High	Base	Windrow	Included	PMFP	6.99422e-05	kg PM2.5 eq
	Land Application	Medium-High	Base	Windrow	Included	PMFP	5.72627e-05	kg PM2.5 eq
	Effluent release	Medium-High	Base	Windrow	Included	PMFP	4.99741e-05	kg PM2.5 eq
	ClearCove SCP	Medium-High	Base	Windrow	Included	PMFP	3.45622e-05	kg PM2.5 eq
	Control Building	Medium-High	Base	Windrow	Included	PMFP	8.8213e-06	kg PM2.5 eq
	Anaerobic Digestion	Medium-High	Base	Windrow	Included	PMFP	-0.00783	kg PM2.5 eq
	Aeration Tanks	Medium-High	Base	Windrow	Included	SFP	0.16577	kg O3 eq
	Primary Clarification	Medium-High	Base	Windrow	Included	SFP	0.04807	kg O3 eq
	Pre-Anoxic & Swing tank	Medium-High	Base	Windrow	Included	SFP	0.04192	kg O3 eq
	Wet Well	Medium-High	Base	Windrow	Included	SFP	0.03313	kg O3 eq
	Waste Receiving	Medium-High	Base	Windrow	Included	SFP	0.03071	kg O3 eq
	Influent Pump Station	Medium-High	Base	Windrow	Included	SFP	0.0194	kg O3 eq
	Wastewater collection	Medium-High	Base	Windrow	Included	SFP	0.01192	kg O3 eq
	Belt filter press	Medium-High	Base	Windrow	Included	SFP	0.00971	kg O3 eq
	Gravity Belt Thickener	Medium-High	Base	Windrow	Included	SFP	0.00665	kg O3 eq
	Blend Tank	Medium-High	Base	Windrow	Included	SFP	0.00497	kg O3 eq
	Effluent release	Medium-High	Base	Windrow	Included	SFP	0.00339	kg O3 eq
	ClearCove SCP	Medium-High	Base	Windrow	Included	SFP	0.00246	kg O3 eq
	Biosolids composting	Medium-High	Base	Windrow	Included	SFP	0.00145	kg O3 eq
	Control Building	Medium-High	Base	Windrow	Included	SFP	0.00054	kg O3 eq
	Land Application	Medium-High	Base	Windrow	Included	SFP	-0.00369	kg O3 eq
	Anaerobic Digestion	Medium-High	Base	Windrow	Included	SFP	-0.55771	kg O3 eq
	Waste Receiving	Medium-High	Base	Windrow	Included	WU	0.00028	m3 H2O
	Influent Pump Station	Medium-High	Base	Windrow	Included	WU	0.00018	m3 H2O
	Primary Clarification	Medium-High	Base	Windrow	Included	WU	0.00018	m3 H2O
	Aeration Tanks	Medium-High	Base	Windrow	Included	WU	0.00016	m3 H2O
	Control Building	Medium-High	Base	Windrow	Included	WU	0.00015	m3 H2O
	Effluent release	Medium-High	Base	Windrow	Included	WU	-0.03703	m3 H2O
	Pre-Anoxic & Swing tank	Medium-High	Base	Windrow	Included	WU	4.32353e-05	m3 H2O
	Gravity Belt Thickener	Medium-High	Base	Windrow	Included	WU	3.04081e-05	m3 H2O
	Belt filter press	Medium-High	Base	Windrow	Included	WU	2.89866e-05	m3 H2O
	Wet Well	Medium-High	Base	Windrow	Included	WU	1.75069e-05	m3 H2O
	Blend Tank	Medium-High	Base	Windrow	Included	WU	7.01795e-06	m3 H2O
	Wastewater collection	Medium-High	Base	Windrow	Included	WU	5.06089e-06	m3 H2O
	Biosolids composting	Medium-High	Base	Windrow	Included	WU	1.41139e-06	m3 H2O
	ClearCove SCP	Medium-High	Base	Windrow	Included	WU	7.6697e-07	m3 H2O
	Anaerobic Digestion	Medium-High	Base	Windrow	Included	WU	-0.00015	m3 H2O
	Land Application	Medium-High	Base	Windrow	Included	WU	-0.00153	m3 H2O
	Waste Receiving	Medium-High	Base	Windrow	Included	FDP	0.09726	kg oil eq
	Aeration Tanks	Medium-High	Base	Windrow	Included	FDP	0.06359	kg oil eq
	Primary Clarification	Medium-High	Base	Windrow	Included	FDP	0.02105	kg oil eq
	Pre-Anoxic & Swing tank	Medium-High	Base	Windrow	Included	FDP	0.01598	kg oil eq
	Influent Pump Station	Medium-High	Base	Windrow	Included	FDP	0.01509	kg oil eq
	Wet Well	Medium-High	Base	Windrow	Included	FDP	0.01249	kg oil eq
	Belt filter press	Medium-High	Base	Windrow	Included	FDP	0.00768	kg oil eq
	Gravity Belt Thickener	Medium-High	Base	Windrow	Included	FDP	0.00692	kg oil eq
	Wastewater collection	Medium-High	Base	Windrow	Included	FDP	0.0045	kg oil eq
	Control Building	Medium-High	Base	Windrow	Included	FDP	0.0028	kg oil eq
	Effluent release	Medium-High	Base	Windrow	Included	FDP	0.00236	kg oil eq
	Blend Tank	Medium-High	Base	Windrow	Included	FDP	0.00192	kg oil eq
	ClearCove SCP	Medium-High	Base	Windrow	Included	FDP	0.00091	kg oil eq
	Biosolids composting	Medium-High	Base	Windrow	Included	FDP	0.00058	kg oil eq
	Land Application	Medium-High	Base	Windrow	Included	FDP	-0.00818	kg oil eq
	Anaerobic Digestion	Medium-High	Base	Windrow	Included	FDP	-0.30039	kg oil eq
	Biosolids composting	Medium-Low	Base	Windrow	Included	GCCP	1.10854	kg CO2 eq
	Pre-Anoxic & Swing tank	Medium-Low	Base	Windrow	Included	GCCP	0.21083	kg CO2 eq
	Aeration Tanks	Medium-Low	Base	Windrow	Included	GCCP	0.16822	kg CO2 eq
	Waste Receiving	Medium-Low	Base	Windrow	Included	GCCP	0.12355	kg CO2 eq
	Anaerobic Digestion	Medium-Low	Base	Windrow	Included	GCCP	0.06366	kg CO2 eq
	Primary Clarification	Medium-Low	Base	Windrow	Included	GCCP	0.05708	kg CO2 eq
	Effluent release	Medium-Low	Base	Windrow	Included	GCCP	0.05264	kg CO2 eq
	Influent Pump Station	Medium-Low	Base	Windrow	Included	GCCP	0.0505	kg CO2 eq
	Wet Well	Medium-Low	Base	Windrow	Included	GCCP	0.03326	kg CO2 eq
	Belt filter press	Medium-Low	Base	Windrow	Included	GCCP	0.01991	kg CO2 eq
	Gravity Belt Thickener	Medium-Low	Base	Windrow	Included	GCCP	0.01455	kg CO2 eq
	Wastewater collection	Medium-Low	Base	Windrow	Included	GCCP	0.01351	kg CO2 eq
	Control Building	Medium-Low	Base	Windrow	Included	GCCP	0.0083	kg CO2 eq
	Blend Tank	Medium-Low	Base	Windrow	Included	GCCP	0.00504	kg CO2 eq
	ClearCove SCP	Medium-Low	Base	Windrow	Included	GCCP	0.00241	kg CO2 eq
	Land Application	Medium-Low	Base	Windrow	Included	GCCP	-0.71572	kg CO2 eq
	Effluent release	Medium-Low	Base	Windrow	Included	EP	0.01161	kg N eq
	Land Application	Medium-Low	Base	Windrow	Included	EP	0.00316	kg N eq
	Aeration Tanks	Medium-Low	Base	Windrow	Included	EP	0.00055	kg N eq
	Biosolids composting	Medium-Low	Base	Windrow	Included	EP	0.00054	kg N eq
	Influent Pump Station	Medium-Low	Base	Windrow	Included	EP	0.00025	kg N eq
	Primary Clarification	Medium-Low	Base	Windrow	Included	EP	0.0002	kg N eq
	Waste Receiving	Medium-Low	Base	Windrow	Included	EP	0.00019	kg N eq
	Pre-Anoxic & Swing tank	Medium-Low	Base	Windrow	Included	EP	0.00014	kg N eq
	Wet Well	Medium-Low	Base	Windrow	Included	EP	0.00011	kg N eq
	Belt filter press	Medium-Low	Base	Windrow	Included	EP	7.89418e-05	kg N eq
	Gravity Belt Thickener	Medium-Low	Base	Windrow	Included	EP	6.05903e-05	kg N eq
	Wastewater collection	Medium-Low	Base	Windrow	Included	EP	3.75598e-05	kg N eq
	Control Building	Medium-Low	Base	Windrow	Included	EP	3.68746e-05	kg N eq
	Blend Tank	Medium-Low	Base	Windrow	Included	EP	1.62157e-05	kg N eq
	ClearCove SCP	Medium-Low	Base	Windrow	Included	EP	7.75672e-06	kg N eq
	Anaerobic Digestion	Medium-Low	Base	Windrow	Included	EP	-7.82801e-05	kg N eq
	Waste Receiving	Medium-Low	Base	Windrow	Included	CED	4.27896	MJ
	Aeration Tanks	Medium-Low	Base	Windrow	Included	CED	3.53305	MJ
	Primary Clarification	Medium-Low	Base	Windrow	Included	CED	1.16289	MJ
	Pre-Anoxic & Swing tank	Medium-Low	Base	Windrow	Included	CED	0.88705	MJ
	Influent Pump Station	Medium-Low	Base	Windrow	Included	CED	0.88297	MJ
	Wet Well	Medium-Low	Base	Windrow	Included	CED	0.69645	MJ
	Belt filter press	Medium-Low	Base	Windrow	Included	CED	0.44939	MJ
	Gravity Belt Thickener	Medium-Low	Base	Windrow	Included	CED	0.33404	MJ
	Anaerobic Digestion	Medium-Low	Base	Windrow	Included	CED	0.27453	MJ
	Wastewater collection	Medium-Low	Base	Windrow	Included	CED	0.25606	MJ
	Control Building	Medium-Low	Base	Windrow	Included	CED	0.14599	MJ
	Effluent release	Medium-Low	Base	Windrow	Included	CED	0.13321	MJ
	Blend Tank	Medium-Low	Base	Windrow	Included	CED	0.10638	MJ
	ClearCove SCP	Medium-Low	Base	Windrow	Included	CED	0.05093	MJ
	Biosolids composting	Medium-Low	Base	Windrow	Included	CED	0.03238	MJ
	Land Application	Medium-Low	Base	Windrow	Included	CED	-0.68347	MJ
	Aeration Tanks	Medium-Low	Base	Windrow	Included	PMFP	0.00233	kg PM2.5 eq
	Primary Clarification	Medium-Low	Base	Windrow	Included	PMFP	0.00068	kg PM2.5 eq
	Pre-Anoxic & Swing tank	Medium-Low	Base	Windrow	Included	PMFP	0.00059	kg PM2.5 eq
	Wet Well	Medium-Low	Base	Windrow	Included	PMFP	0.00047	kg PM2.5 eq
	Waste Receiving	Medium-Low	Base	Windrow	Included	PMFP	0.00031	kg PM2.5 eq
	Biosolids composting	Medium-Low	Base	Windrow	Included	PMFP	0.00031	kg PM2.5 eq
	Influent Pump Station	Medium-Low	Base	Windrow	Included	PMFP	0.00027	kg PM2.5 eq
	Wastewater collection	Medium-Low	Base	Windrow	Included	PMFP	0.00017	kg PM2.5 eq
	Belt filter press	Medium-Low	Base	Windrow	Included	PMFP	0.00016	kg PM2.5 eq
	Gravity Belt Thickener	Medium-Low	Base	Windrow	Included	PMFP	9.51538e-05	kg PM2.5 eq
	Blend Tank	Medium-Low	Base	Windrow	Included	PMFP	6.99422e-05	kg PM2.5 eq
	Land Application	Medium-Low	Base	Windrow	Included	PMFP	6.67276e-05	kg PM2.5 eq
	Effluent release	Medium-Low	Base	Windrow	Included	PMFP	4.99741e-05	kg PM2.5 eq
	ClearCove SCP	Medium-Low	Base	Windrow	Included	PMFP	3.45622e-05	kg PM2.5 eq
	Control Building	Medium-Low	Base	Windrow	Included	PMFP	8.8213e-06	kg PM2.5 eq
	Anaerobic Digestion	Medium-Low	Base	Windrow	Included	PMFP	-0.00038	kg PM2.5 eq
	Aeration Tanks	Medium-Low	Base	Windrow	Included	AP	0.01722	kg SO2 eq
	Biosolids composting	Medium-Low	Base	Windrow	Included	AP	0.00857	kg SO2 eq
	Primary Clarification	Medium-Low	Base	Windrow	Included	AP	0.00498	kg SO2 eq
	Pre-Anoxic & Swing tank	Medium-Low	Base	Windrow	Included	AP	0.00435	kg SO2 eq
	Land Application	Medium-Low	Base	Windrow	Included	AP	0.00411	kg SO2 eq
	Wet Well	Medium-Low	Base	Windrow	Included	AP	0.00345	kg SO2 eq
	Waste Receiving	Medium-Low	Base	Windrow	Included	AP	0.00253	kg SO2 eq
	Influent Pump Station	Medium-Low	Base	Windrow	Included	AP	0.00207	kg SO2 eq
	Wastewater collection	Medium-Low	Base	Windrow	Included	AP	0.00123	kg SO2 eq
	Belt filter press	Medium-Low	Base	Windrow	Included	AP	0.0012	kg SO2 eq
	Gravity Belt Thickener	Medium-Low	Base	Windrow	Included	AP	0.0007	kg SO2 eq
	Blend Tank	Medium-Low	Base	Windrow	Included	AP	0.00052	kg SO2 eq
	Effluent release	Medium-Low	Base	Windrow	Included	AP	0.00035	kg SO2 eq
	ClearCove SCP	Medium-Low	Base	Windrow	Included	AP	0.00026	kg SO2 eq
	Control Building	Medium-Low	Base	Windrow	Included	AP	4.03547e-05	kg SO2 eq
	Anaerobic Digestion	Medium-Low	Base	Windrow	Included	AP	-0.00278	kg SO2 eq
	Aeration Tanks	Medium-Low	Base	Windrow	Included	SFP	0.16577	kg O3 eq
	Primary Clarification	Medium-Low	Base	Windrow	Included	SFP	0.04807	kg O3 eq
	Pre-Anoxic & Swing tank	Medium-Low	Base	Windrow	Included	SFP	0.04192	kg O3 eq
	Wet Well	Medium-Low	Base	Windrow	Included	SFP	0.03313	kg O3 eq
	Waste Receiving	Medium-Low	Base	Windrow	Included	SFP	0.03071	kg O3 eq
	Influent Pump Station	Medium-Low	Base	Windrow	Included	SFP	0.0194	kg O3 eq
	Wastewater collection	Medium-Low	Base	Windrow	Included	SFP	0.01192	kg O3 eq
	Belt filter press	Medium-Low	Base	Windrow	Included	SFP	0.01145	kg O3 eq
	Gravity Belt Thickener	Medium-Low	Base	Windrow	Included	SFP	0.00665	kg O3 eq
	Blend Tank	Medium-Low	Base	Windrow	Included	SFP	0.00497	kg O3 eq
	Effluent release	Medium-Low	Base	Windrow	Included	SFP	0.00339	kg O3 eq
	ClearCove SCP	Medium-Low	Base	Windrow	Included	SFP	0.00246	kg O3 eq
	Biosolids composting	Medium-Low	Base	Windrow	Included	SFP	0.00169	kg O3 eq
	Control Building	Medium-Low	Base	Windrow	Included	SFP	0.00054	kg O3 eq
	Land Application	Medium-Low	Base	Windrow	Included	SFP	-0.00429	kg O3 eq
	Anaerobic Digestion	Medium-Low	Base	Windrow	Included	SFP	-0.02673	kg O3 eq
	Waste Receiving	Medium-Low	Base	Windrow	Included	WU	0.00028	m3 H2O
	Influent Pump Station	Medium-Low	Base	Windrow	Included	WU	0.00018	m3 H2O
	Primary Clarification	Medium-Low	Base	Windrow	Included	WU	0.00018	m3 H2O
	Aeration Tanks	Medium-Low	Base	Windrow	Included	WU	0.00016	m3 H2O
	Control Building	Medium-Low	Base	Windrow	Included	WU	0.00015	m3 H2O
	Effluent release	Medium-Low	Base	Windrow	Included	WU	-0.03703	m3 H2O
	Pre-Anoxic & Swing tank	Medium-Low	Base	Windrow	Included	WU	4.32353e-05	m3 H2O
	Belt filter press	Medium-Low	Base	Windrow	Included	WU	3.41962e-05	m3 H2O
	Gravity Belt Thickener	Medium-Low	Base	Windrow	Included	WU	3.04081e-05	m3 H2O
	Anaerobic Digestion	Medium-Low	Base	Windrow	Included	WU	2.73686e-05	m3 H2O
	Wet Well	Medium-Low	Base	Windrow	Included	WU	1.75069e-05	m3 H2O
	Blend Tank	Medium-Low	Base	Windrow	Included	WU	7.01795e-06	m3 H2O
	Wastewater collection	Medium-Low	Base	Windrow	Included	WU	5.06089e-06	m3 H2O
	Biosolids composting	Medium-Low	Base	Windrow	Included	WU	1.67133e-06	m3 H2O
	ClearCove SCP	Medium-Low	Base	Windrow	Included	WU	7.6697e-07	m3 H2O
	Land Application	Medium-Low	Base	Windrow	Included	WU	-0.00177	m3 H2O
	Waste Receiving	Medium-Low	Base	Windrow	Included	FDP	0.09726	kg oil eq
	Aeration Tanks	Medium-Low	Base	Windrow	Included	FDP	0.06359	kg oil eq
	Primary Clarification	Medium-Low	Base	Windrow	Included	FDP	0.02105	kg oil eq
	Pre-Anoxic & Swing tank	Medium-Low	Base	Windrow	Included	FDP	0.01598	kg oil eq
	Influent Pump Station	Medium-Low	Base	Windrow	Included	FDP	0.01509	kg oil eq
	Wet Well	Medium-Low	Base	Windrow	Included	FDP	0.01249	kg oil eq
	Anaerobic Digestion	Medium-Low	Base	Windrow	Included	FDP	0.00966	kg oil eq
	Belt filter press	Medium-Low	Base	Windrow	Included	FDP	0.00906	kg oil eq
	Gravity Belt Thickener	Medium-Low	Base	Windrow	Included	FDP	0.00692	kg oil eq
	Wastewater collection	Medium-Low	Base	Windrow	Included	FDP	0.0045	kg oil eq
	Control Building	Medium-Low	Base	Windrow	Included	FDP	0.0028	kg oil eq
	Effluent release	Medium-Low	Base	Windrow	Included	FDP	0.00236	kg oil eq
	Blend Tank	Medium-Low	Base	Windrow	Included	FDP	0.00192	kg oil eq
	ClearCove SCP	Medium-Low	Base	Windrow	Included	FDP	0.00091	kg oil eq
	Biosolids composting	Medium-Low	Base	Windrow	Included	FDP	0.00069	kg oil eq
	Land Application	Medium-Low	Base	Windrow	Included	FDP	-0.00952	kg oil eq
	Biosolids composting	Base-Base	High	Windrow	Included	GCCP	1.63132	kg CO2 eq
	Pre-Anoxic & Swing tank	Base-Base	High	Windrow	Included	GCCP	0.20883	kg CO2 eq
	Aeration Tanks	Base-Base	High	Windrow	Included	GCCP	0.16822	kg CO2 eq
	Waste Receiving	Base-Base	High	Windrow	Included	GCCP	0.10241	kg CO2 eq
	Primary Clarification	Base-Base	High	Windrow	Included	GCCP	0.05708	kg CO2 eq
	Effluent release	Base-Base	High	Windrow	Included	GCCP	0.05264	kg CO2 eq
	Influent Pump Station	Base-Base	High	Windrow	Included	GCCP	0.0505	kg CO2 eq
	Wet Well	Base-Base	High	Windrow	Included	GCCP	0.03326	kg CO2 eq
	Gravity Belt Thickener	Base-Base	High	Windrow	Included	GCCP	0.01455	kg CO2 eq
	Wastewater collection	Base-Base	High	Windrow	Included	GCCP	0.01351	kg CO2 eq
	Belt filter press	Base-Base	High	Windrow	Included	GCCP	0.01278	kg CO2 eq
	Control Building	Base-Base	High	Windrow	Included	GCCP	0.0083	kg CO2 eq
	Blend Tank	Base-Base	High	Windrow	Included	GCCP	0.00504	kg CO2 eq
	ClearCove SCP	Base-Base	High	Windrow	Included	GCCP	0.00241	kg CO2 eq
	Anaerobic Digestion	Base-Base	High	Windrow	Included	GCCP	-0.05664	kg CO2 eq
	Land Application	Base-Base	High	Windrow	Included	GCCP	-0.47162	kg CO2 eq
	Effluent release	Base-Base	High	Windrow	Included	EP	0.01161	kg N eq
	Land Application	Base-Base	High	Windrow	Included	EP	0.00197	kg N eq
	Biosolids composting	Base-Base	High	Windrow	Included	EP	0.00068	kg N eq
	Aeration Tanks	Base-Base	High	Windrow	Included	EP	0.00055	kg N eq
	Influent Pump Station	Base-Base	High	Windrow	Included	EP	0.00025	kg N eq
	Primary Clarification	Base-Base	High	Windrow	Included	EP	0.0002	kg N eq
	Waste Receiving	Base-Base	High	Windrow	Included	EP	0.00016	kg N eq
	Pre-Anoxic & Swing tank	Base-Base	High	Windrow	Included	EP	0.00014	kg N eq
	Wet Well	Base-Base	High	Windrow	Included	EP	0.00011	kg N eq
	Gravity Belt Thickener	Base-Base	High	Windrow	Included	EP	6.05903e-05	kg N eq
	Belt filter press	Base-Base	High	Windrow	Included	EP	5.06508e-05	kg N eq
	Wastewater collection	Base-Base	High	Windrow	Included	EP	3.75598e-05	kg N eq
	Control Building	Base-Base	High	Windrow	Included	EP	3.68746e-05	kg N eq
	Blend Tank	Base-Base	High	Windrow	Included	EP	1.62157e-05	kg N eq
	ClearCove SCP	Base-Base	High	Windrow	Included	EP	7.75672e-06	kg N eq
	Anaerobic Digestion	Base-Base	High	Windrow	Included	EP	-0.0002	kg N eq
	Aeration Tanks	Base-Base	High	Windrow	Included	CED	3.53305	MJ
	Waste Receiving	Base-Base	High	Windrow	Included	CED	3.49827	MJ
	Primary Clarification	Base-Base	High	Windrow	Included	CED	1.16289	MJ
	Pre-Anoxic & Swing tank	Base-Base	High	Windrow	Included	CED	0.88417	MJ
	Influent Pump Station	Base-Base	High	Windrow	Included	CED	0.88297	MJ
	Wet Well	Base-Base	High	Windrow	Included	CED	0.69645	MJ
	Gravity Belt Thickener	Base-Base	High	Windrow	Included	CED	0.33404	MJ
	Belt filter press	Base-Base	High	Windrow	Included	CED	0.28834	MJ
	Wastewater collection	Base-Base	High	Windrow	Included	CED	0.25606	MJ
	Control Building	Base-Base	High	Windrow	Included	CED	0.14599	MJ
	Effluent release	Base-Base	High	Windrow	Included	CED	0.13321	MJ
	Blend Tank	Base-Base	High	Windrow	Included	CED	0.10638	MJ
	ClearCove SCP	Base-Base	High	Windrow	Included	CED	0.05093	MJ
	Biosolids composting	Base-Base	High	Windrow	Included	CED	0.02065	MJ
	Land Application	Base-Base	High	Windrow	Included	CED	-0.4131	MJ
	Anaerobic Digestion	Base-Base	High	Windrow	Included	CED	-1.99752	MJ
	Waste Receiving	Base-Base	High	Windrow	Included	FDP	0.07917	kg oil eq
	Aeration Tanks	Base-Base	High	Windrow	Included	FDP	0.06359	kg oil eq
	Primary Clarification	Base-Base	High	Windrow	Included	FDP	0.02105	kg oil eq
	Pre-Anoxic & Swing tank	Base-Base	High	Windrow	Included	FDP	0.01592	kg oil eq
	Influent Pump Station	Base-Base	High	Windrow	Included	FDP	0.01509	kg oil eq
	Wet Well	Base-Base	High	Windrow	Included	FDP	0.01249	kg oil eq
	Gravity Belt Thickener	Base-Base	High	Windrow	Included	FDP	0.00692	kg oil eq
	Belt filter press	Base-Base	High	Windrow	Included	FDP	0.00581	kg oil eq
	Wastewater collection	Base-Base	High	Windrow	Included	FDP	0.0045	kg oil eq
	Control Building	Base-Base	High	Windrow	Included	FDP	0.0028	kg oil eq
	Effluent release	Base-Base	High	Windrow	Included	FDP	0.00236	kg oil eq
	Blend Tank	Base-Base	High	Windrow	Included	FDP	0.00192	kg oil eq
	ClearCove SCP	Base-Base	High	Windrow	Included	FDP	0.00091	kg oil eq
	Biosolids composting	Base-Base	High	Windrow	Included	FDP	0.00044	kg oil eq
	Land Application	Base-Base	High	Windrow	Included	FDP	-0.00557	kg oil eq
	Anaerobic Digestion	Base-Base	High	Windrow	Included	FDP	-0.04003	kg oil eq
	Aeration Tanks	Base-Base	High	Windrow	Included	AP	0.01722	kg SO2 eq
	Biosolids composting	Base-Base	High	Windrow	Included	AP	0.01078	kg SO2 eq
	Primary Clarification	Base-Base	High	Windrow	Included	AP	0.00498	kg SO2 eq
	Pre-Anoxic & Swing tank	Base-Base	High	Windrow	Included	AP	0.00433	kg SO2 eq
	Wet Well	Base-Base	High	Windrow	Included	AP	0.00345	kg SO2 eq
	Waste Receiving	Base-Base	High	Windrow	Included	AP	0.00238	kg SO2 eq
	Land Application	Base-Base	High	Windrow	Included	AP	0.00235	kg SO2 eq
	Influent Pump Station	Base-Base	High	Windrow	Included	AP	0.00207	kg SO2 eq
	Wastewater collection	Base-Base	High	Windrow	Included	AP	0.00123	kg SO2 eq
	Belt filter press	Base-Base	High	Windrow	Included	AP	0.00077	kg SO2 eq
	Gravity Belt Thickener	Base-Base	High	Windrow	Included	AP	0.0007	kg SO2 eq
	Blend Tank	Base-Base	High	Windrow	Included	AP	0.00052	kg SO2 eq
	Effluent release	Base-Base	High	Windrow	Included	AP	0.00035	kg SO2 eq
	ClearCove SCP	Base-Base	High	Windrow	Included	AP	0.00026	kg SO2 eq
	Control Building	Base-Base	High	Windrow	Included	AP	4.03547e-05	kg SO2 eq
	Anaerobic Digestion	Base-Base	High	Windrow	Included	AP	-0.00645	kg SO2 eq
	Aeration Tanks	Base-Base	High	Windrow	Included	PMFP	0.00233	kg PM2.5 eq
	Primary Clarification	Base-Base	High	Windrow	Included	PMFP	0.00068	kg PM2.5 eq
	Pre-Anoxic & Swing tank	Base-Base	High	Windrow	Included	PMFP	0.00059	kg PM2.5 eq
	Wet Well	Base-Base	High	Windrow	Included	PMFP	0.00047	kg PM2.5 eq
	Biosolids composting	Base-Base	High	Windrow	Included	PMFP	0.00038	kg PM2.5 eq
	Waste Receiving	Base-Base	High	Windrow	Included	PMFP	0.0003	kg PM2.5 eq
	Influent Pump Station	Base-Base	High	Windrow	Included	PMFP	0.00027	kg PM2.5 eq
	Wastewater collection	Base-Base	High	Windrow	Included	PMFP	0.00017	kg PM2.5 eq
	Belt filter press	Base-Base	High	Windrow	Included	PMFP	0.0001	kg PM2.5 eq
	Gravity Belt Thickener	Base-Base	High	Windrow	Included	PMFP	9.51538e-05	kg PM2.5 eq
	Blend Tank	Base-Base	High	Windrow	Included	PMFP	6.99422e-05	kg PM2.5 eq
	Effluent release	Base-Base	High	Windrow	Included	PMFP	4.99741e-05	kg PM2.5 eq
	ClearCove SCP	Base-Base	High	Windrow	Included	PMFP	3.45622e-05	kg PM2.5 eq
	Land Application	Base-Base	High	Windrow	Included	PMFP	3.42258e-05	kg PM2.5 eq
	Control Building	Base-Base	High	Windrow	Included	PMFP	8.8213e-06	kg PM2.5 eq
	Anaerobic Digestion	Base-Base	High	Windrow	Included	PMFP	-0.00087	kg PM2.5 eq
	Aeration Tanks	Base-Base	High	Windrow	Included	SFP	0.16577	kg O3 eq
	Primary Clarification	Base-Base	High	Windrow	Included	SFP	0.04807	kg O3 eq
	Pre-Anoxic & Swing tank	Base-Base	High	Windrow	Included	SFP	0.04178	kg O3 eq
	Wet Well	Base-Base	High	Windrow	Included	SFP	0.03313	kg O3 eq
	Waste Receiving	Base-Base	High	Windrow	Included	SFP	0.02795	kg O3 eq
	Influent Pump Station	Base-Base	High	Windrow	Included	SFP	0.0194	kg O3 eq
	Wastewater collection	Base-Base	High	Windrow	Included	SFP	0.01192	kg O3 eq
	Belt filter press	Base-Base	High	Windrow	Included	SFP	0.00735	kg O3 eq
	Gravity Belt Thickener	Base-Base	High	Windrow	Included	SFP	0.00665	kg O3 eq
	Blend Tank	Base-Base	High	Windrow	Included	SFP	0.00497	kg O3 eq
	Effluent release	Base-Base	High	Windrow	Included	SFP	0.00339	kg O3 eq
	ClearCove SCP	Base-Base	High	Windrow	Included	SFP	0.00246	kg O3 eq
	Biosolids composting	Base-Base	High	Windrow	Included	SFP	0.00143	kg O3 eq
	Control Building	Base-Base	High	Windrow	Included	SFP	0.00054	kg O3 eq
	Land Application	Base-Base	High	Windrow	Included	SFP	-0.00269	kg O3 eq
	Anaerobic Digestion	Base-Base	High	Windrow	Included	SFP	-0.06194	kg O3 eq
	Waste Receiving	Base-Base	High	Windrow	Included	WU	0.00023	m3 H2O
	Influent Pump Station	Base-Base	High	Windrow	Included	WU	0.00018	m3 H2O
	Primary Clarification	Base-Base	High	Windrow	Included	WU	0.00018	m3 H2O
	Aeration Tanks	Base-Base	High	Windrow	Included	WU	0.00016	m3 H2O
	Control Building	Base-Base	High	Windrow	Included	WU	0.00015	m3 H2O
	Effluent release	Base-Base	High	Windrow	Included	WU	-0.03703	m3 H2O
	Pre-Anoxic & Swing tank	Base-Base	High	Windrow	Included	WU	4.31921e-05	m3 H2O
	Gravity Belt Thickener	Base-Base	High	Windrow	Included	WU	3.04081e-05	m3 H2O
	Belt filter press	Base-Base	High	Windrow	Included	WU	2.19411e-05	m3 H2O
	Wet Well	Base-Base	High	Windrow	Included	WU	1.75069e-05	m3 H2O
	Anaerobic Digestion	Base-Base	High	Windrow	Included	WU	1.21043e-05	m3 H2O
	Blend Tank	Base-Base	High	Windrow	Included	WU	7.01795e-06	m3 H2O
	Wastewater collection	Base-Base	High	Windrow	Included	WU	5.06089e-06	m3 H2O
	Biosolids composting	Base-Base	High	Windrow	Included	WU	1.06952e-06	m3 H2O
	ClearCove SCP	Base-Base	High	Windrow	Included	WU	7.6697e-07	m3 H2O
	Land Application	Base-Base	High	Windrow	Included	WU	-0.00115	m3 H2O
	Biosolids composting	Base-High	High	Windrow	Included	GCCP	1.51973	kg CO2 eq
	Pre-Anoxic & Swing tank	Base-High	High	Windrow	Included	GCCP	0.20883	kg CO2 eq
	Aeration Tanks	Base-High	High	Windrow	Included	GCCP	0.16822	kg CO2 eq
	Waste Receiving	Base-High	High	Windrow	Included	GCCP	0.10241	kg CO2 eq
	Primary Clarification	Base-High	High	Windrow	Included	GCCP	0.05708	kg CO2 eq
	Effluent release	Base-High	High	Windrow	Included	GCCP	0.05264	kg CO2 eq
	Influent Pump Station	Base-High	High	Windrow	Included	GCCP	0.0505	kg CO2 eq
	Wet Well	Base-High	High	Windrow	Included	GCCP	0.03326	kg CO2 eq
	Gravity Belt Thickener	Base-High	High	Windrow	Included	GCCP	0.01455	kg CO2 eq
	Wastewater collection	Base-High	High	Windrow	Included	GCCP	0.01351	kg CO2 eq
	Belt filter press	Base-High	High	Windrow	Included	GCCP	0.01231	kg CO2 eq
	Control Building	Base-High	High	Windrow	Included	GCCP	0.0083	kg CO2 eq
	Blend Tank	Base-High	High	Windrow	Included	GCCP	0.00504	kg CO2 eq
	ClearCove SCP	Base-High	High	Windrow	Included	GCCP	0.00241	kg CO2 eq
	Land Application	Base-High	High	Windrow	Included	GCCP	-0.4432	kg CO2 eq
	Anaerobic Digestion	Base-High	High	Windrow	Included	GCCP	-0.44909	kg CO2 eq
	Effluent release	Base-High	High	Windrow	Included	EP	0.01161	kg N eq
	Land Application	Base-High	High	Windrow	Included	EP	0.00188	kg N eq
	Biosolids composting	Base-High	High	Windrow	Included	EP	0.00063	kg N eq
	Aeration Tanks	Base-High	High	Windrow	Included	EP	0.00055	kg N eq
	Influent Pump Station	Base-High	High	Windrow	Included	EP	0.00025	kg N eq
	Primary Clarification	Base-High	High	Windrow	Included	EP	0.0002	kg N eq
	Waste Receiving	Base-High	High	Windrow	Included	EP	0.00016	kg N eq
	Pre-Anoxic & Swing tank	Base-High	High	Windrow	Included	EP	0.00014	kg N eq
	Wet Well	Base-High	High	Windrow	Included	EP	0.00011	kg N eq
	Gravity Belt Thickener	Base-High	High	Windrow	Included	EP	6.05903e-05	kg N eq
	Belt filter press	Base-High	High	Windrow	Included	EP	4.87915e-05	kg N eq
	Wastewater collection	Base-High	High	Windrow	Included	EP	3.75598e-05	kg N eq
	Control Building	Base-High	High	Windrow	Included	EP	3.68746e-05	kg N eq
	Blend Tank	Base-High	High	Windrow	Included	EP	1.62157e-05	kg N eq
	ClearCove SCP	Base-High	High	Windrow	Included	EP	7.75672e-06	kg N eq
	Anaerobic Digestion	Base-High	High	Windrow	Included	EP	-0.0012	kg N eq
	Aeration Tanks	Base-High	High	Windrow	Included	CED	3.53305	MJ
	Waste Receiving	Base-High	High	Windrow	Included	CED	3.49827	MJ
	Primary Clarification	Base-High	High	Windrow	Included	CED	1.16289	MJ
	Pre-Anoxic & Swing tank	Base-High	High	Windrow	Included	CED	0.88417	MJ
	Influent Pump Station	Base-High	High	Windrow	Included	CED	0.88297	MJ
	Wet Well	Base-High	High	Windrow	Included	CED	0.69645	MJ
	Gravity Belt Thickener	Base-High	High	Windrow	Included	CED	0.33404	MJ
	Belt filter press	Base-High	High	Windrow	Included	CED	0.27775	MJ
	Wastewater collection	Base-High	High	Windrow	Included	CED	0.25606	MJ
	Control Building	Base-High	High	Windrow	Included	CED	0.14599	MJ
	Effluent release	Base-High	High	Windrow	Included	CED	0.13321	MJ
	Blend Tank	Base-High	High	Windrow	Included	CED	0.10638	MJ
	ClearCove SCP	Base-High	High	Windrow	Included	CED	0.05093	MJ
	Biosolids composting	Base-High	High	Windrow	Included	CED	0.02001	MJ
	Land Application	Base-High	High	Windrow	Included	CED	-0.39336	MJ
	Anaerobic Digestion	Base-High	High	Windrow	Included	CED	-11.3126	MJ
	Aeration Tanks	Base-High	High	Windrow	Included	AP	0.01722	kg SO2 eq
	Biosolids composting	Base-High	High	Windrow	Included	AP	0.01005	kg SO2 eq
	Primary Clarification	Base-High	High	Windrow	Included	AP	0.00498	kg SO2 eq
	Pre-Anoxic & Swing tank	Base-High	High	Windrow	Included	AP	0.00433	kg SO2 eq
	Wet Well	Base-High	High	Windrow	Included	AP	0.00345	kg SO2 eq
	Waste Receiving	Base-High	High	Windrow	Included	AP	0.00238	kg SO2 eq
	Land Application	Base-High	High	Windrow	Included	AP	0.00224	kg SO2 eq
	Influent Pump Station	Base-High	High	Windrow	Included	AP	0.00207	kg SO2 eq
	Wastewater collection	Base-High	High	Windrow	Included	AP	0.00123	kg SO2 eq
	Belt filter press	Base-High	High	Windrow	Included	AP	0.00074	kg SO2 eq
	Gravity Belt Thickener	Base-High	High	Windrow	Included	AP	0.0007	kg SO2 eq
	Blend Tank	Base-High	High	Windrow	Included	AP	0.00052	kg SO2 eq
	Effluent release	Base-High	High	Windrow	Included	AP	0.00035	kg SO2 eq
	ClearCove SCP	Base-High	High	Windrow	Included	AP	0.00026	kg SO2 eq
	Control Building	Base-High	High	Windrow	Included	AP	4.03547e-05	kg SO2 eq
	Anaerobic Digestion	Base-High	High	Windrow	Included	AP	-0.03887	kg SO2 eq
	Waste Receiving	Base-High	High	Windrow	Included	FDP	0.07917	kg oil eq
	Aeration Tanks	Base-High	High	Windrow	Included	FDP	0.06359	kg oil eq
	Primary Clarification	Base-High	High	Windrow	Included	FDP	0.02105	kg oil eq
	Pre-Anoxic & Swing tank	Base-High	High	Windrow	Included	FDP	0.01592	kg oil eq
	Influent Pump Station	Base-High	High	Windrow	Included	FDP	0.01509	kg oil eq
	Wet Well	Base-High	High	Windrow	Included	FDP	0.01249	kg oil eq
	Gravity Belt Thickener	Base-High	High	Windrow	Included	FDP	0.00692	kg oil eq
	Belt filter press	Base-High	High	Windrow	Included	FDP	0.0056	kg oil eq
	Wastewater collection	Base-High	High	Windrow	Included	FDP	0.0045	kg oil eq
	Control Building	Base-High	High	Windrow	Included	FDP	0.0028	kg oil eq
	Effluent release	Base-High	High	Windrow	Included	FDP	0.00236	kg oil eq
	Blend Tank	Base-High	High	Windrow	Included	FDP	0.00192	kg oil eq
	ClearCove SCP	Base-High	High	Windrow	Included	FDP	0.00091	kg oil eq
	Biosolids composting	Base-High	High	Windrow	Included	FDP	0.00043	kg oil eq
	Land Application	Base-High	High	Windrow	Included	FDP	-0.00531	kg oil eq
	Anaerobic Digestion	Base-High	High	Windrow	Included	FDP	-0.22373	kg oil eq
	Aeration Tanks	Base-High	High	Windrow	Included	PMFP	0.00233	kg PM2.5 eq
	Primary Clarification	Base-High	High	Windrow	Included	PMFP	0.00068	kg PM2.5 eq
	Pre-Anoxic & Swing tank	Base-High	High	Windrow	Included	PMFP	0.00059	kg PM2.5 eq
	Wet Well	Base-High	High	Windrow	Included	PMFP	0.00047	kg PM2.5 eq
	Biosolids composting	Base-High	High	Windrow	Included	PMFP	0.00036	kg PM2.5 eq
	Waste Receiving	Base-High	High	Windrow	Included	PMFP	0.0003	kg PM2.5 eq
	Influent Pump Station	Base-High	High	Windrow	Included	PMFP	0.00027	kg PM2.5 eq
	Wastewater collection	Base-High	High	Windrow	Included	PMFP	0.00017	kg PM2.5 eq
	Belt filter press	Base-High	High	Windrow	Included	PMFP	0.0001	kg PM2.5 eq
	Gravity Belt Thickener	Base-High	High	Windrow	Included	PMFP	9.51538e-05	kg PM2.5 eq
	Blend Tank	Base-High	High	Windrow	Included	PMFP	6.99422e-05	kg PM2.5 eq
	Effluent release	Base-High	High	Windrow	Included	PMFP	4.99741e-05	kg PM2.5 eq
	ClearCove SCP	Base-High	High	Windrow	Included	PMFP	3.45622e-05	kg PM2.5 eq
	Land Application	Base-High	High	Windrow	Included	PMFP	3.27043e-05	kg PM2.5 eq
	Control Building	Base-High	High	Windrow	Included	PMFP	8.8213e-06	kg PM2.5 eq
	Anaerobic Digestion	Base-High	High	Windrow	Included	PMFP	-0.00524	kg PM2.5 eq
	Aeration Tanks	Base-High	High	Windrow	Included	SFP	0.16577	kg O3 eq
	Primary Clarification	Base-High	High	Windrow	Included	SFP	0.04807	kg O3 eq
	Pre-Anoxic & Swing tank	Base-High	High	Windrow	Included	SFP	0.04178	kg O3 eq
	Wet Well	Base-High	High	Windrow	Included	SFP	0.03313	kg O3 eq
	Waste Receiving	Base-High	High	Windrow	Included	SFP	0.02795	kg O3 eq
	Influent Pump Station	Base-High	High	Windrow	Included	SFP	0.0194	kg O3 eq
	Wastewater collection	Base-High	High	Windrow	Included	SFP	0.01192	kg O3 eq
	Belt filter press	Base-High	High	Windrow	Included	SFP	0.00708	kg O3 eq
	Gravity Belt Thickener	Base-High	High	Windrow	Included	SFP	0.00665	kg O3 eq
	Blend Tank	Base-High	High	Windrow	Included	SFP	0.00497	kg O3 eq
	Effluent release	Base-High	High	Windrow	Included	SFP	0.00339	kg O3 eq
	ClearCove SCP	Base-High	High	Windrow	Included	SFP	0.00246	kg O3 eq
	Biosolids composting	Base-High	High	Windrow	Included	SFP	0.00134	kg O3 eq
	Control Building	Base-High	High	Windrow	Included	SFP	0.00054	kg O3 eq
	Land Application	Base-High	High	Windrow	Included	SFP	-0.00256	kg O3 eq
	Anaerobic Digestion	Base-High	High	Windrow	Included	SFP	-0.37367	kg O3 eq
	Waste Receiving	Base-High	High	Windrow	Included	WU	0.00023	m3 H2O
	Influent Pump Station	Base-High	High	Windrow	Included	WU	0.00018	m3 H2O
	Primary Clarification	Base-High	High	Windrow	Included	WU	0.00018	m3 H2O
	Aeration Tanks	Base-High	High	Windrow	Included	WU	0.00016	m3 H2O
	Control Building	Base-High	High	Windrow	Included	WU	0.00015	m3 H2O
	Effluent release	Base-High	High	Windrow	Included	WU	-0.03703	m3 H2O
	Pre-Anoxic & Swing tank	Base-High	High	Windrow	Included	WU	4.31921e-05	m3 H2O
	Gravity Belt Thickener	Base-High	High	Windrow	Included	WU	3.04081e-05	m3 H2O
	Belt filter press	Base-High	High	Windrow	Included	WU	2.11356e-05	m3 H2O
	Wet Well	Base-High	High	Windrow	Included	WU	1.75069e-05	m3 H2O
	Blend Tank	Base-High	High	Windrow	Included	WU	7.01795e-06	m3 H2O
	Wastewater collection	Base-High	High	Windrow	Included	WU	5.06089e-06	m3 H2O
	Biosolids composting	Base-High	High	Windrow	Included	WU	1.03293e-06	m3 H2O
	ClearCove SCP	Base-High	High	Windrow	Included	WU	7.6697e-07	m3 H2O
	Anaerobic Digestion	Base-High	High	Windrow	Included	WU	-9.31629e-05	m3 H2O
	Land Application	Base-High	High	Windrow	Included	WU	-0.00109	m3 H2O
	Biosolids composting	Base-Low	High	Windrow	Included	GCCP	1.77807	kg CO2 eq
	Pre-Anoxic & Swing tank	Base-Low	High	Windrow	Included	GCCP	0.20883	kg CO2 eq
	Anaerobic Digestion	Base-Low	High	Windrow	Included	GCCP	0.17545	kg CO2 eq
	Aeration Tanks	Base-Low	High	Windrow	Included	GCCP	0.16822	kg CO2 eq
	Waste Receiving	Base-Low	High	Windrow	Included	GCCP	0.10241	kg CO2 eq
	Primary Clarification	Base-Low	High	Windrow	Included	GCCP	0.05708	kg CO2 eq
	Effluent release	Base-Low	High	Windrow	Included	GCCP	0.05264	kg CO2 eq
	Influent Pump Station	Base-Low	High	Windrow	Included	GCCP	0.0505	kg CO2 eq
	Wet Well	Base-Low	High	Windrow	Included	GCCP	0.03326	kg CO2 eq
	Gravity Belt Thickener	Base-Low	High	Windrow	Included	GCCP	0.01455	kg CO2 eq
	Belt filter press	Base-Low	High	Windrow	Included	GCCP	0.01418	kg CO2 eq
	Wastewater collection	Base-Low	High	Windrow	Included	GCCP	0.01351	kg CO2 eq
	Control Building	Base-Low	High	Windrow	Included	GCCP	0.0083	kg CO2 eq
	Blend Tank	Base-Low	High	Windrow	Included	GCCP	0.00504	kg CO2 eq
	ClearCove SCP	Base-Low	High	Windrow	Included	GCCP	0.00241	kg CO2 eq
	Land Application	Base-Low	High	Windrow	Included	GCCP	-0.52361	kg CO2 eq
	Effluent release	Base-Low	High	Windrow	Included	EP	0.01161	kg N eq
	Land Application	Base-Low	High	Windrow	Included	EP	0.00219	kg N eq
	Biosolids composting	Base-Low	High	Windrow	Included	EP	0.00074	kg N eq
	Aeration Tanks	Base-Low	High	Windrow	Included	EP	0.00055	kg N eq
	Influent Pump Station	Base-Low	High	Windrow	Included	EP	0.00025	kg N eq
	Primary Clarification	Base-Low	High	Windrow	Included	EP	0.0002	kg N eq
	Waste Receiving	Base-Low	High	Windrow	Included	EP	0.00016	kg N eq
	Pre-Anoxic & Swing tank	Base-Low	High	Windrow	Included	EP	0.00014	kg N eq
	Wet Well	Base-Low	High	Windrow	Included	EP	0.00011	kg N eq
	Anaerobic Digestion	Base-Low	High	Windrow	Included	EP	9.17983e-05	kg N eq
	Gravity Belt Thickener	Base-Low	High	Windrow	Included	EP	6.05903e-05	kg N eq
	Belt filter press	Base-Low	High	Windrow	Included	EP	5.62289e-05	kg N eq
	Wastewater collection	Base-Low	High	Windrow	Included	EP	3.75598e-05	kg N eq
	Control Building	Base-Low	High	Windrow	Included	EP	3.68746e-05	kg N eq
	Blend Tank	Base-Low	High	Windrow	Included	EP	1.62157e-05	kg N eq
	ClearCove SCP	Base-Low	High	Windrow	Included	EP	7.75672e-06	kg N eq
	Aeration Tanks	Base-Low	High	Windrow	Included	CED	3.53305	MJ
	Waste Receiving	Base-Low	High	Windrow	Included	CED	3.49827	MJ
	Anaerobic Digestion	Base-Low	High	Windrow	Included	CED	2.73322	MJ
	Primary Clarification	Base-Low	High	Windrow	Included	CED	1.16289	MJ
	Pre-Anoxic & Swing tank	Base-Low	High	Windrow	Included	CED	0.88417	MJ
	Influent Pump Station	Base-Low	High	Windrow	Included	CED	0.88297	MJ
	Wet Well	Base-Low	High	Windrow	Included	CED	0.69645	MJ
	Gravity Belt Thickener	Base-Low	High	Windrow	Included	CED	0.33404	MJ
	Belt filter press	Base-Low	High	Windrow	Included	CED	0.32009	MJ
	Wastewater collection	Base-Low	High	Windrow	Included	CED	0.25606	MJ
	Control Building	Base-Low	High	Windrow	Included	CED	0.14599	MJ
	Effluent release	Base-Low	High	Windrow	Included	CED	0.13321	MJ
	Blend Tank	Base-Low	High	Windrow	Included	CED	0.10638	MJ
	ClearCove SCP	Base-Low	High	Windrow	Included	CED	0.05093	MJ
	Biosolids composting	Base-Low	High	Windrow	Included	CED	0.02292	MJ
	Land Application	Base-Low	High	Windrow	Included	CED	-0.4587	MJ
	Aeration Tanks	Base-Low	High	Windrow	Included	AP	0.01722	kg SO2 eq
	Biosolids composting	Base-Low	High	Windrow	Included	AP	0.01167	kg SO2 eq
	Primary Clarification	Base-Low	High	Windrow	Included	AP	0.00498	kg SO2 eq
	Pre-Anoxic & Swing tank	Base-Low	High	Windrow	Included	AP	0.00433	kg SO2 eq
	Wet Well	Base-Low	High	Windrow	Included	AP	0.00345	kg SO2 eq
	Land Application	Base-Low	High	Windrow	Included	AP	0.00261	kg SO2 eq
	Anaerobic Digestion	Base-Low	High	Windrow	Included	AP	0.0026	kg SO2 eq
	Waste Receiving	Base-Low	High	Windrow	Included	AP	0.00238	kg SO2 eq
	Influent Pump Station	Base-Low	High	Windrow	Included	AP	0.00207	kg SO2 eq
	Wastewater collection	Base-Low	High	Windrow	Included	AP	0.00123	kg SO2 eq
	Belt filter press	Base-Low	High	Windrow	Included	AP	0.00086	kg SO2 eq
	Gravity Belt Thickener	Base-Low	High	Windrow	Included	AP	0.0007	kg SO2 eq
	Blend Tank	Base-Low	High	Windrow	Included	AP	0.00052	kg SO2 eq
	Effluent release	Base-Low	High	Windrow	Included	AP	0.00035	kg SO2 eq
	ClearCove SCP	Base-Low	High	Windrow	Included	AP	0.00026	kg SO2 eq
	Control Building	Base-Low	High	Windrow	Included	AP	4.03547e-05	kg SO2 eq
	Waste Receiving	Base-Low	High	Windrow	Included	FDP	0.07917	kg oil eq
	Aeration Tanks	Base-Low	High	Windrow	Included	FDP	0.06359	kg oil eq
	Anaerobic Digestion	Base-Low	High	Windrow	Included	FDP	0.06181	kg oil eq
	Primary Clarification	Base-Low	High	Windrow	Included	FDP	0.02105	kg oil eq
	Pre-Anoxic & Swing tank	Base-Low	High	Windrow	Included	FDP	0.01592	kg oil eq
	Influent Pump Station	Base-Low	High	Windrow	Included	FDP	0.01509	kg oil eq
	Wet Well	Base-Low	High	Windrow	Included	FDP	0.01249	kg oil eq
	Gravity Belt Thickener	Base-Low	High	Windrow	Included	FDP	0.00692	kg oil eq
	Belt filter press	Base-Low	High	Windrow	Included	FDP	0.00645	kg oil eq
	Wastewater collection	Base-Low	High	Windrow	Included	FDP	0.0045	kg oil eq
	Control Building	Base-Low	High	Windrow	Included	FDP	0.0028	kg oil eq
	Effluent release	Base-Low	High	Windrow	Included	FDP	0.00236	kg oil eq
	Blend Tank	Base-Low	High	Windrow	Included	FDP	0.00192	kg oil eq
	ClearCove SCP	Base-Low	High	Windrow	Included	FDP	0.00091	kg oil eq
	Biosolids composting	Base-Low	High	Windrow	Included	FDP	0.00049	kg oil eq
	Land Application	Base-Low	High	Windrow	Included	FDP	-0.00619	kg oil eq
	Aeration Tanks	Base-Low	High	Windrow	Included	PMFP	0.00233	kg PM2.5 eq
	Primary Clarification	Base-Low	High	Windrow	Included	PMFP	0.00068	kg PM2.5 eq
	Pre-Anoxic & Swing tank	Base-Low	High	Windrow	Included	PMFP	0.00059	kg PM2.5 eq
	Wet Well	Base-Low	High	Windrow	Included	PMFP	0.00047	kg PM2.5 eq
	Biosolids composting	Base-Low	High	Windrow	Included	PMFP	0.00042	kg PM2.5 eq
	Anaerobic Digestion	Base-Low	High	Windrow	Included	PMFP	0.00034	kg PM2.5 eq
	Waste Receiving	Base-Low	High	Windrow	Included	PMFP	0.0003	kg PM2.5 eq
	Influent Pump Station	Base-Low	High	Windrow	Included	PMFP	0.00027	kg PM2.5 eq
	Wastewater collection	Base-Low	High	Windrow	Included	PMFP	0.00017	kg PM2.5 eq
	Belt filter press	Base-Low	High	Windrow	Included	PMFP	0.00012	kg PM2.5 eq
	Gravity Belt Thickener	Base-Low	High	Windrow	Included	PMFP	9.51538e-05	kg PM2.5 eq
	Blend Tank	Base-Low	High	Windrow	Included	PMFP	6.99422e-05	kg PM2.5 eq
	Effluent release	Base-Low	High	Windrow	Included	PMFP	4.99741e-05	kg PM2.5 eq
	Land Application	Base-Low	High	Windrow	Included	PMFP	3.80185e-05	kg PM2.5 eq
	ClearCove SCP	Base-Low	High	Windrow	Included	PMFP	3.45622e-05	kg PM2.5 eq
	Control Building	Base-Low	High	Windrow	Included	PMFP	8.8213e-06	kg PM2.5 eq
	Aeration Tanks	Base-Low	High	Windrow	Included	SFP	0.16577	kg O3 eq
	Primary Clarification	Base-Low	High	Windrow	Included	SFP	0.04807	kg O3 eq
	Pre-Anoxic & Swing tank	Base-Low	High	Windrow	Included	SFP	0.04178	kg O3 eq
	Wet Well	Base-Low	High	Windrow	Included	SFP	0.03313	kg O3 eq
	Waste Receiving	Base-Low	High	Windrow	Included	SFP	0.02795	kg O3 eq
	Anaerobic Digestion	Base-Low	High	Windrow	Included	SFP	0.02489	kg O3 eq
	Influent Pump Station	Base-Low	High	Windrow	Included	SFP	0.0194	kg O3 eq
	Wastewater collection	Base-Low	High	Windrow	Included	SFP	0.01192	kg O3 eq
	Belt filter press	Base-Low	High	Windrow	Included	SFP	0.00816	kg O3 eq
	Gravity Belt Thickener	Base-Low	High	Windrow	Included	SFP	0.00665	kg O3 eq
	Blend Tank	Base-Low	High	Windrow	Included	SFP	0.00497	kg O3 eq
	Effluent release	Base-Low	High	Windrow	Included	SFP	0.00339	kg O3 eq
	ClearCove SCP	Base-Low	High	Windrow	Included	SFP	0.00246	kg O3 eq
	Biosolids composting	Base-Low	High	Windrow	Included	SFP	0.00156	kg O3 eq
	Control Building	Base-Low	High	Windrow	Included	SFP	0.00054	kg O3 eq
	Land Application	Base-Low	High	Windrow	Included	SFP	-0.00298	kg O3 eq
	Waste Receiving	Base-Low	High	Windrow	Included	WU	0.00023	m3 H2O
	Influent Pump Station	Base-Low	High	Windrow	Included	WU	0.00018	m3 H2O
	Primary Clarification	Base-Low	High	Windrow	Included	WU	0.00018	m3 H2O
	Aeration Tanks	Base-Low	High	Windrow	Included	WU	0.00016	m3 H2O
	Control Building	Base-Low	High	Windrow	Included	WU	0.00015	m3 H2O
	Effluent release	Base-Low	High	Windrow	Included	WU	-0.03703	m3 H2O
	Anaerobic Digestion	Base-Low	High	Windrow	Included	WU	4.73329e-05	m3 H2O
	Pre-Anoxic & Swing tank	Base-Low	High	Windrow	Included	WU	4.31921e-05	m3 H2O
	Gravity Belt Thickener	Base-Low	High	Windrow	Included	WU	3.04081e-05	m3 H2O
	Belt filter press	Base-Low	High	Windrow	Included	WU	2.43574e-05	m3 H2O
	Wet Well	Base-Low	High	Windrow	Included	WU	1.75069e-05	m3 H2O
	Blend Tank	Base-Low	High	Windrow	Included	WU	7.01795e-06	m3 H2O
	Wastewater collection	Base-Low	High	Windrow	Included	WU	5.06089e-06	m3 H2O
	Biosolids composting	Base-Low	High	Windrow	Included	WU	1.1873e-06	m3 H2O
	ClearCove SCP	Base-Low	High	Windrow	Included	WU	7.6697e-07	m3 H2O
	Land Application	Base-Low	High	Windrow	Included	WU	-0.00127	m3 H2O
	Biosolids composting	High-Base	High	Windrow	Included	GCCP	3.14151	kg CO2 eq
	Pre-Anoxic & Swing tank	High-Base	High	Windrow	Included	GCCP	0.21356	kg CO2 eq
	Aeration Tanks	High-Base	High	Windrow	Included	GCCP	0.16822	kg CO2 eq
	Waste Receiving	High-Base	High	Windrow	Included	GCCP	0.14685	kg CO2 eq
	Primary Clarification	High-Base	High	Windrow	Included	GCCP	0.05708	kg CO2 eq
	Effluent release	High-Base	High	Windrow	Included	GCCP	0.05264	kg CO2 eq
	Influent Pump Station	High-Base	High	Windrow	Included	GCCP	0.0505	kg CO2 eq
	Wet Well	High-Base	High	Windrow	Included	GCCP	0.03326	kg CO2 eq
	Belt filter press	High-Base	High	Windrow	Included	GCCP	0.02412	kg CO2 eq
	Gravity Belt Thickener	High-Base	High	Windrow	Included	GCCP	0.01455	kg CO2 eq
	Wastewater collection	High-Base	High	Windrow	Included	GCCP	0.01351	kg CO2 eq
	Control Building	High-Base	High	Windrow	Included	GCCP	0.0083	kg CO2 eq
	Blend Tank	High-Base	High	Windrow	Included	GCCP	0.00504	kg CO2 eq
	ClearCove SCP	High-Base	High	Windrow	Included	GCCP	0.00241	kg CO2 eq
	Anaerobic Digestion	High-Base	High	Windrow	Included	GCCP	-0.57099	kg CO2 eq
	Land Application	High-Base	High	Windrow	Included	GCCP	-0.89947	kg CO2 eq
	Waste Receiving	High-Base	High	Windrow	Included	CED	5.13934	MJ
	Aeration Tanks	High-Base	High	Windrow	Included	CED	3.53305	MJ
	Primary Clarification	High-Base	High	Windrow	Included	CED	1.16289	MJ
	Pre-Anoxic & Swing tank	High-Base	High	Windrow	Included	CED	0.89064	MJ
	Influent Pump Station	High-Base	High	Windrow	Included	CED	0.88297	MJ
	Wet Well	High-Base	High	Windrow	Included	CED	0.69645	MJ
	Belt filter press	High-Base	High	Windrow	Included	CED	0.54423	MJ
	Gravity Belt Thickener	High-Base	High	Windrow	Included	CED	0.33404	MJ
	Wastewater collection	High-Base	High	Windrow	Included	CED	0.25606	MJ
	Control Building	High-Base	High	Windrow	Included	CED	0.14599	MJ
	Effluent release	High-Base	High	Windrow	Included	CED	0.13321	MJ
	Blend Tank	High-Base	High	Windrow	Included	CED	0.10638	MJ
	ClearCove SCP	High-Base	High	Windrow	Included	CED	0.05093	MJ
	Biosolids composting	High-Base	High	Windrow	Included	CED	0.03882	MJ
	Land Application	High-Base	High	Windrow	Included	CED	-0.78339	MJ
	Anaerobic Digestion	High-Base	High	Windrow	Included	CED	-14.1798	MJ
	Effluent release	High-Base	High	Windrow	Included	EP	0.01161	kg N eq
	Land Application	High-Base	High	Windrow	Included	EP	0.00374	kg N eq
	Biosolids composting	High-Base	High	Windrow	Included	EP	0.00131	kg N eq
	Aeration Tanks	High-Base	High	Windrow	Included	EP	0.00055	kg N eq
	Influent Pump Station	High-Base	High	Windrow	Included	EP	0.00025	kg N eq
	Waste Receiving	High-Base	High	Windrow	Included	EP	0.00022	kg N eq
	Primary Clarification	High-Base	High	Windrow	Included	EP	0.0002	kg N eq
	Pre-Anoxic & Swing tank	High-Base	High	Windrow	Included	EP	0.00014	kg N eq
	Wet Well	High-Base	High	Windrow	Included	EP	0.00011	kg N eq
	Belt filter press	High-Base	High	Windrow	Included	EP	9.56018e-05	kg N eq
	Gravity Belt Thickener	High-Base	High	Windrow	Included	EP	6.05903e-05	kg N eq
	Wastewater collection	High-Base	High	Windrow	Included	EP	3.75598e-05	kg N eq
	Control Building	High-Base	High	Windrow	Included	EP	3.68746e-05	kg N eq
	Blend Tank	High-Base	High	Windrow	Included	EP	1.62157e-05	kg N eq
	ClearCove SCP	High-Base	High	Windrow	Included	EP	7.75672e-06	kg N eq
	Anaerobic Digestion	High-Base	High	Windrow	Included	EP	-0.00138	kg N eq
	Biosolids composting	High-Base	High	Windrow	Included	AP	0.02079	kg SO2 eq
	Aeration Tanks	High-Base	High	Windrow	Included	AP	0.01722	kg SO2 eq
	Primary Clarification	High-Base	High	Windrow	Included	AP	0.00498	kg SO2 eq
	Land Application	High-Base	High	Windrow	Included	AP	0.00445	kg SO2 eq
	Pre-Anoxic & Swing tank	High-Base	High	Windrow	Included	AP	0.00436	kg SO2 eq
	Wet Well	High-Base	High	Windrow	Included	AP	0.00345	kg SO2 eq
	Waste Receiving	High-Base	High	Windrow	Included	AP	0.0027	kg SO2 eq
	Influent Pump Station	High-Base	High	Windrow	Included	AP	0.00207	kg SO2 eq
	Belt filter press	High-Base	High	Windrow	Included	AP	0.00146	kg SO2 eq
	Wastewater collection	High-Base	High	Windrow	Included	AP	0.00123	kg SO2 eq
	Gravity Belt Thickener	High-Base	High	Windrow	Included	AP	0.0007	kg SO2 eq
	Blend Tank	High-Base	High	Windrow	Included	AP	0.00052	kg SO2 eq
	Effluent release	High-Base	High	Windrow	Included	AP	0.00035	kg SO2 eq
	ClearCove SCP	High-Base	High	Windrow	Included	AP	0.00026	kg SO2 eq
	Control Building	High-Base	High	Windrow	Included	AP	4.03547e-05	kg SO2 eq
	Anaerobic Digestion	High-Base	High	Windrow	Included	AP	-0.0447	kg SO2 eq
	Waste Receiving	High-Base	High	Windrow	Included	FDP	0.11719	kg oil eq
	Aeration Tanks	High-Base	High	Windrow	Included	FDP	0.06359	kg oil eq
	Primary Clarification	High-Base	High	Windrow	Included	FDP	0.02105	kg oil eq
	Pre-Anoxic & Swing tank	High-Base	High	Windrow	Included	FDP	0.01604	kg oil eq
	Influent Pump Station	High-Base	High	Windrow	Included	FDP	0.01509	kg oil eq
	Wet Well	High-Base	High	Windrow	Included	FDP	0.01249	kg oil eq
	Belt filter press	High-Base	High	Windrow	Included	FDP	0.01097	kg oil eq
	Gravity Belt Thickener	High-Base	High	Windrow	Included	FDP	0.00692	kg oil eq
	Wastewater collection	High-Base	High	Windrow	Included	FDP	0.0045	kg oil eq
	Control Building	High-Base	High	Windrow	Included	FDP	0.0028	kg oil eq
	Effluent release	High-Base	High	Windrow	Included	FDP	0.00236	kg oil eq
	Blend Tank	High-Base	High	Windrow	Included	FDP	0.00192	kg oil eq
	ClearCove SCP	High-Base	High	Windrow	Included	FDP	0.00091	kg oil eq
	Biosolids composting	High-Base	High	Windrow	Included	FDP	0.00083	kg oil eq
	Land Application	High-Base	High	Windrow	Included	FDP	-0.01056	kg oil eq
	Anaerobic Digestion	High-Base	High	Windrow	Included	FDP	-0.28505	kg oil eq
	Aeration Tanks	High-Base	High	Windrow	Included	PMFP	0.00233	kg PM2.5 eq
	Biosolids composting	High-Base	High	Windrow	Included	PMFP	0.00074	kg PM2.5 eq
	Primary Clarification	High-Base	High	Windrow	Included	PMFP	0.00068	kg PM2.5 eq
	Pre-Anoxic & Swing tank	High-Base	High	Windrow	Included	PMFP	0.00059	kg PM2.5 eq
	Wet Well	High-Base	High	Windrow	Included	PMFP	0.00047	kg PM2.5 eq
	Waste Receiving	High-Base	High	Windrow	Included	PMFP	0.00033	kg PM2.5 eq
	Influent Pump Station	High-Base	High	Windrow	Included	PMFP	0.00027	kg PM2.5 eq
	Belt filter press	High-Base	High	Windrow	Included	PMFP	0.0002	kg PM2.5 eq
	Wastewater collection	High-Base	High	Windrow	Included	PMFP	0.00017	kg PM2.5 eq
	Gravity Belt Thickener	High-Base	High	Windrow	Included	PMFP	9.51538e-05	kg PM2.5 eq
	Blend Tank	High-Base	High	Windrow	Included	PMFP	6.99422e-05	kg PM2.5 eq
	Land Application	High-Base	High	Windrow	Included	PMFP	6.47831e-05	kg PM2.5 eq
	Effluent release	High-Base	High	Windrow	Included	PMFP	4.99741e-05	kg PM2.5 eq
	ClearCove SCP	High-Base	High	Windrow	Included	PMFP	3.45622e-05	kg PM2.5 eq
	Control Building	High-Base	High	Windrow	Included	PMFP	8.8213e-06	kg PM2.5 eq
	Anaerobic Digestion	High-Base	High	Windrow	Included	PMFP	-0.00602	kg PM2.5 eq
	Aeration Tanks	High-Base	High	Windrow	Included	SFP	0.16577	kg O3 eq
	Primary Clarification	High-Base	High	Windrow	Included	SFP	0.04807	kg O3 eq
	Pre-Anoxic & Swing tank	High-Base	High	Windrow	Included	SFP	0.04209	kg O3 eq
	Waste Receiving	High-Base	High	Windrow	Included	SFP	0.03376	kg O3 eq
	Wet Well	High-Base	High	Windrow	Included	SFP	0.03313	kg O3 eq
	Influent Pump Station	High-Base	High	Windrow	Included	SFP	0.0194	kg O3 eq
	Belt filter press	High-Base	High	Windrow	Included	SFP	0.01387	kg O3 eq
	Wastewater collection	High-Base	High	Windrow	Included	SFP	0.01192	kg O3 eq
	Gravity Belt Thickener	High-Base	High	Windrow	Included	SFP	0.00665	kg O3 eq
	Blend Tank	High-Base	High	Windrow	Included	SFP	0.00497	kg O3 eq
	Effluent release	High-Base	High	Windrow	Included	SFP	0.00339	kg O3 eq
	Biosolids composting	High-Base	High	Windrow	Included	SFP	0.00273	kg O3 eq
	ClearCove SCP	High-Base	High	Windrow	Included	SFP	0.00246	kg O3 eq
	Control Building	High-Base	High	Windrow	Included	SFP	0.00054	kg O3 eq
	Land Application	High-Base	High	Windrow	Included	SFP	-0.0051	kg O3 eq
	Anaerobic Digestion	High-Base	High	Windrow	Included	SFP	-0.42966	kg O3 eq
	Waste Receiving	High-Base	High	Windrow	Included	WU	0.00034	m3 H2O
	Influent Pump Station	High-Base	High	Windrow	Included	WU	0.00018	m3 H2O
	Primary Clarification	High-Base	High	Windrow	Included	WU	0.00018	m3 H2O
	Aeration Tanks	High-Base	High	Windrow	Included	WU	0.00016	m3 H2O
	Control Building	High-Base	High	Windrow	Included	WU	0.00015	m3 H2O
	Effluent release	High-Base	High	Windrow	Included	WU	-0.03703	m3 H2O
	Pre-Anoxic & Swing tank	High-Base	High	Windrow	Included	WU	4.32894e-05	m3 H2O
	Belt filter press	High-Base	High	Windrow	Included	WU	4.14131e-05	m3 H2O
	Gravity Belt Thickener	High-Base	High	Windrow	Included	WU	3.04081e-05	m3 H2O
	Wet Well	High-Base	High	Windrow	Included	WU	1.75069e-05	m3 H2O
	Blend Tank	High-Base	High	Windrow	Included	WU	7.01795e-06	m3 H2O
	Wastewater collection	High-Base	High	Windrow	Included	WU	5.06089e-06	m3 H2O
	Biosolids composting	High-Base	High	Windrow	Included	WU	2.01519e-06	m3 H2O
	ClearCove SCP	High-Base	High	Windrow	Included	WU	7.6697e-07	m3 H2O
	Anaerobic Digestion	High-Base	High	Windrow	Included	WU	-0.00012	m3 H2O
	Land Application	High-Base	High	Windrow	Included	WU	-0.00218	m3 H2O
	Biosolids composting	High-High	High	Windrow	Included	GCCP	2.88412	kg CO2 eq
	Pre-Anoxic & Swing tank	High-High	High	Windrow	Included	GCCP	0.21356	kg CO2 eq
	Aeration Tanks	High-High	High	Windrow	Included	GCCP	0.16822	kg CO2 eq
	Waste Receiving	High-High	High	Windrow	Included	GCCP	0.14685	kg CO2 eq
	Primary Clarification	High-High	High	Windrow	Included	GCCP	0.05708	kg CO2 eq
	Effluent release	High-High	High	Windrow	Included	GCCP	0.05264	kg CO2 eq
	Influent Pump Station	High-High	High	Windrow	Included	GCCP	0.0505	kg CO2 eq
	Wet Well	High-High	High	Windrow	Included	GCCP	0.03326	kg CO2 eq
	Belt filter press	High-High	High	Windrow	Included	GCCP	0.02288	kg CO2 eq
	Gravity Belt Thickener	High-High	High	Windrow	Included	GCCP	0.01455	kg CO2 eq
	Wastewater collection	High-High	High	Windrow	Included	GCCP	0.01351	kg CO2 eq
	Control Building	High-High	High	Windrow	Included	GCCP	0.0083	kg CO2 eq
	Blend Tank	High-High	High	Windrow	Included	GCCP	0.00504	kg CO2 eq
	ClearCove SCP	High-High	High	Windrow	Included	GCCP	0.00241	kg CO2 eq
	Land Application	High-High	High	Windrow	Included	GCCP	-0.83977	kg CO2 eq
	Anaerobic Digestion	High-High	High	Windrow	Included	GCCP	-0.88992	kg CO2 eq
	Effluent release	High-High	High	Windrow	Included	EP	0.01161	kg N eq
	Land Application	High-High	High	Windrow	Included	EP	0.00352	kg N eq
	Biosolids composting	High-High	High	Windrow	Included	EP	0.0012	kg N eq
	Aeration Tanks	High-High	High	Windrow	Included	EP	0.00055	kg N eq
	Influent Pump Station	High-High	High	Windrow	Included	EP	0.00025	kg N eq
	Waste Receiving	High-High	High	Windrow	Included	EP	0.00022	kg N eq
	Primary Clarification	High-High	High	Windrow	Included	EP	0.0002	kg N eq
	Pre-Anoxic & Swing tank	High-High	High	Windrow	Included	EP	0.00014	kg N eq
	Wet Well	High-High	High	Windrow	Included	EP	0.00011	kg N eq
	Belt filter press	High-High	High	Windrow	Included	EP	9.07108e-05	kg N eq
	Gravity Belt Thickener	High-High	High	Windrow	Included	EP	6.05903e-05	kg N eq
	Wastewater collection	High-High	High	Windrow	Included	EP	3.75598e-05	kg N eq
	Control Building	High-High	High	Windrow	Included	EP	3.68746e-05	kg N eq
	Blend Tank	High-High	High	Windrow	Included	EP	1.62157e-05	kg N eq
	ClearCove SCP	High-High	High	Windrow	Included	EP	7.75672e-06	kg N eq
	Anaerobic Digestion	High-High	High	Windrow	Included	EP	-0.00296	kg N eq
	Waste Receiving	High-High	High	Windrow	Included	CED	5.13934	MJ
	Aeration Tanks	High-High	High	Windrow	Included	CED	3.53305	MJ
	Primary Clarification	High-High	High	Windrow	Included	CED	1.16289	MJ
	Pre-Anoxic & Swing tank	High-High	High	Windrow	Included	CED	0.89064	MJ
	Influent Pump Station	High-High	High	Windrow	Included	CED	0.88297	MJ
	Wet Well	High-High	High	Windrow	Included	CED	0.69645	MJ
	Belt filter press	High-High	High	Windrow	Included	CED	0.51639	MJ
	Gravity Belt Thickener	High-High	High	Windrow	Included	CED	0.33404	MJ
	Wastewater collection	High-High	High	Windrow	Included	CED	0.25606	MJ
	Control Building	High-High	High	Windrow	Included	CED	0.14599	MJ
	Effluent release	High-High	High	Windrow	Included	CED	0.13321	MJ
	Blend Tank	High-High	High	Windrow	Included	CED	0.10638	MJ
	ClearCove SCP	High-High	High	Windrow	Included	CED	0.05093	MJ
	Biosolids composting	High-High	High	Windrow	Included	CED	0.03707	MJ
	Land Application	High-High	High	Windrow	Included	CED	-0.73781	MJ
	Anaerobic Digestion	High-High	High	Windrow	Included	CED	-23.5671	MJ
	Biosolids composting	High-High	High	Windrow	Included	AP	0.01902	kg SO2 eq
	Aeration Tanks	High-High	High	Windrow	Included	AP	0.01722	kg SO2 eq
	Primary Clarification	High-High	High	Windrow	Included	AP	0.00498	kg SO2 eq
	Pre-Anoxic & Swing tank	High-High	High	Windrow	Included	AP	0.00436	kg SO2 eq
	Land Application	High-High	High	Windrow	Included	AP	0.0042	kg SO2 eq
	Wet Well	High-High	High	Windrow	Included	AP	0.00345	kg SO2 eq
	Waste Receiving	High-High	High	Windrow	Included	AP	0.0027	kg SO2 eq
	Influent Pump Station	High-High	High	Windrow	Included	AP	0.00207	kg SO2 eq
	Belt filter press	High-High	High	Windrow	Included	AP	0.00138	kg SO2 eq
	Wastewater collection	High-High	High	Windrow	Included	AP	0.00123	kg SO2 eq
	Gravity Belt Thickener	High-High	High	Windrow	Included	AP	0.0007	kg SO2 eq
	Blend Tank	High-High	High	Windrow	Included	AP	0.00052	kg SO2 eq
	Effluent release	High-High	High	Windrow	Included	AP	0.00035	kg SO2 eq
	ClearCove SCP	High-High	High	Windrow	Included	AP	0.00026	kg SO2 eq
	Control Building	High-High	High	Windrow	Included	AP	4.03547e-05	kg SO2 eq
	Anaerobic Digestion	High-High	High	Windrow	Included	AP	-0.09684	kg SO2 eq
	Waste Receiving	High-High	High	Windrow	Included	FDP	0.11719	kg oil eq
	Aeration Tanks	High-High	High	Windrow	Included	FDP	0.06359	kg oil eq
	Primary Clarification	High-High	High	Windrow	Included	FDP	0.02105	kg oil eq
	Pre-Anoxic & Swing tank	High-High	High	Windrow	Included	FDP	0.01604	kg oil eq
	Influent Pump Station	High-High	High	Windrow	Included	FDP	0.01509	kg oil eq
	Wet Well	High-High	High	Windrow	Included	FDP	0.01249	kg oil eq
	Belt filter press	High-High	High	Windrow	Included	FDP	0.01041	kg oil eq
	Gravity Belt Thickener	High-High	High	Windrow	Included	FDP	0.00692	kg oil eq
	Wastewater collection	High-High	High	Windrow	Included	FDP	0.0045	kg oil eq
	Control Building	High-High	High	Windrow	Included	FDP	0.0028	kg oil eq
	Effluent release	High-High	High	Windrow	Included	FDP	0.00236	kg oil eq
	Blend Tank	High-High	High	Windrow	Included	FDP	0.00192	kg oil eq
	ClearCove SCP	High-High	High	Windrow	Included	FDP	0.00091	kg oil eq
	Biosolids composting	High-High	High	Windrow	Included	FDP	0.00079	kg oil eq
	Land Application	High-High	High	Windrow	Included	FDP	-0.00995	kg oil eq
	Anaerobic Digestion	High-High	High	Windrow	Included	FDP	-0.44776	kg oil eq
	Aeration Tanks	High-High	High	Windrow	Included	PMFP	0.00233	kg PM2.5 eq
	Primary Clarification	High-High	High	Windrow	Included	PMFP	0.00068	kg PM2.5 eq
	Biosolids composting	High-High	High	Windrow	Included	PMFP	0.00068	kg PM2.5 eq
	Pre-Anoxic & Swing tank	High-High	High	Windrow	Included	PMFP	0.00059	kg PM2.5 eq
	Wet Well	High-High	High	Windrow	Included	PMFP	0.00047	kg PM2.5 eq
	Waste Receiving	High-High	High	Windrow	Included	PMFP	0.00033	kg PM2.5 eq
	Influent Pump Station	High-High	High	Windrow	Included	PMFP	0.00027	kg PM2.5 eq
	Belt filter press	High-High	High	Windrow	Included	PMFP	0.00019	kg PM2.5 eq
	Wastewater collection	High-High	High	Windrow	Included	PMFP	0.00017	kg PM2.5 eq
	Gravity Belt Thickener	High-High	High	Windrow	Included	PMFP	9.51538e-05	kg PM2.5 eq
	Blend Tank	High-High	High	Windrow	Included	PMFP	6.99422e-05	kg PM2.5 eq
	Land Application	High-High	High	Windrow	Included	PMFP	6.11783e-05	kg PM2.5 eq
	Effluent release	High-High	High	Windrow	Included	PMFP	4.99741e-05	kg PM2.5 eq
	ClearCove SCP	High-High	High	Windrow	Included	PMFP	3.45622e-05	kg PM2.5 eq
	Control Building	High-High	High	Windrow	Included	PMFP	8.8213e-06	kg PM2.5 eq
	Anaerobic Digestion	High-High	High	Windrow	Included	PMFP	-0.01309	kg PM2.5 eq
	Aeration Tanks	High-High	High	Windrow	Included	SFP	0.16577	kg O3 eq
	Primary Clarification	High-High	High	Windrow	Included	SFP	0.04807	kg O3 eq
	Pre-Anoxic & Swing tank	High-High	High	Windrow	Included	SFP	0.04209	kg O3 eq
	Waste Receiving	High-High	High	Windrow	Included	SFP	0.03376	kg O3 eq
	Wet Well	High-High	High	Windrow	Included	SFP	0.03313	kg O3 eq
	Influent Pump Station	High-High	High	Windrow	Included	SFP	0.0194	kg O3 eq
	Belt filter press	High-High	High	Windrow	Included	SFP	0.01316	kg O3 eq
	Wastewater collection	High-High	High	Windrow	Included	SFP	0.01192	kg O3 eq
	Gravity Belt Thickener	High-High	High	Windrow	Included	SFP	0.00665	kg O3 eq
	Blend Tank	High-High	High	Windrow	Included	SFP	0.00497	kg O3 eq
	Effluent release	High-High	High	Windrow	Included	SFP	0.00339	kg O3 eq
	Biosolids composting	High-High	High	Windrow	Included	SFP	0.00253	kg O3 eq
	ClearCove SCP	High-High	High	Windrow	Included	SFP	0.00246	kg O3 eq
	Control Building	High-High	High	Windrow	Included	SFP	0.00054	kg O3 eq
	Land Application	High-High	High	Windrow	Included	SFP	-0.0048	kg O3 eq
	Anaerobic Digestion	High-High	High	Windrow	Included	SFP	-0.93126	kg O3 eq
	Waste Receiving	High-High	High	Windrow	Included	WU	0.00034	m3 H2O
	Influent Pump Station	High-High	High	Windrow	Included	WU	0.00018	m3 H2O
	Primary Clarification	High-High	High	Windrow	Included	WU	0.00018	m3 H2O
	Aeration Tanks	High-High	High	Windrow	Included	WU	0.00016	m3 H2O
	Control Building	High-High	High	Windrow	Included	WU	0.00015	m3 H2O
	Effluent release	High-High	High	Windrow	Included	WU	-0.03703	m3 H2O
	Pre-Anoxic & Swing tank	High-High	High	Windrow	Included	WU	4.32894e-05	m3 H2O
	Belt filter press	High-High	High	Windrow	Included	WU	3.92944e-05	m3 H2O
	Gravity Belt Thickener	High-High	High	Windrow	Included	WU	3.04081e-05	m3 H2O
	Wet Well	High-High	High	Windrow	Included	WU	1.75069e-05	m3 H2O
	Blend Tank	High-High	High	Windrow	Included	WU	7.01795e-06	m3 H2O
	Wastewater collection	High-High	High	Windrow	Included	WU	5.06089e-06	m3 H2O
	Biosolids composting	High-High	High	Windrow	Included	WU	1.91722e-06	m3 H2O
	ClearCove SCP	High-High	High	Windrow	Included	WU	7.6697e-07	m3 H2O
	Anaerobic Digestion	High-High	High	Windrow	Included	WU	-0.00027	m3 H2O
	Land Application	High-High	High	Windrow	Included	WU	-0.00205	m3 H2O
	Biosolids composting	High-Low	High	Windrow	Included	GCCP	3.43232	kg CO2 eq
	Pre-Anoxic & Swing tank	High-Low	High	Windrow	Included	GCCP	0.21356	kg CO2 eq
	Aeration Tanks	High-Low	High	Windrow	Included	GCCP	0.16822	kg CO2 eq
	Waste Receiving	High-Low	High	Windrow	Included	GCCP	0.14685	kg CO2 eq
	Primary Clarification	High-Low	High	Windrow	Included	GCCP	0.05708	kg CO2 eq
	Effluent release	High-Low	High	Windrow	Included	GCCP	0.05264	kg CO2 eq
	Influent Pump Station	High-Low	High	Windrow	Included	GCCP	0.0505	kg CO2 eq
	Wet Well	High-Low	High	Windrow	Included	GCCP	0.03326	kg CO2 eq
	Belt filter press	High-Low	High	Windrow	Included	GCCP	0.02782	kg CO2 eq
	Gravity Belt Thickener	High-Low	High	Windrow	Included	GCCP	0.01455	kg CO2 eq
	Wastewater collection	High-Low	High	Windrow	Included	GCCP	0.01351	kg CO2 eq
	Control Building	High-Low	High	Windrow	Included	GCCP	0.0083	kg CO2 eq
	Blend Tank	High-Low	High	Windrow	Included	GCCP	0.00504	kg CO2 eq
	ClearCove SCP	High-Low	High	Windrow	Included	GCCP	0.00241	kg CO2 eq
	Anaerobic Digestion	High-Low	High	Windrow	Included	GCCP	-0.17056	kg CO2 eq
	Land Application	High-Low	High	Windrow	Included	GCCP	-0.99676	kg CO2 eq
	Effluent release	High-Low	High	Windrow	Included	EP	0.01161	kg N eq
	Land Application	High-Low	High	Windrow	Included	EP	0.00423	kg N eq
	Biosolids composting	High-Low	High	Windrow	Included	EP	0.00143	kg N eq
	Aeration Tanks	High-Low	High	Windrow	Included	EP	0.00055	kg N eq
	Influent Pump Station	High-Low	High	Windrow	Included	EP	0.00025	kg N eq
	Waste Receiving	High-Low	High	Windrow	Included	EP	0.00022	kg N eq
	Primary Clarification	High-Low	High	Windrow	Included	EP	0.0002	kg N eq
	Pre-Anoxic & Swing tank	High-Low	High	Windrow	Included	EP	0.00014	kg N eq
	Belt filter press	High-Low	High	Windrow	Included	EP	0.00011	kg N eq
	Wet Well	High-Low	High	Windrow	Included	EP	0.00011	kg N eq
	Gravity Belt Thickener	High-Low	High	Windrow	Included	EP	6.05903e-05	kg N eq
	Wastewater collection	High-Low	High	Windrow	Included	EP	3.75598e-05	kg N eq
	Control Building	High-Low	High	Windrow	Included	EP	3.68746e-05	kg N eq
	Blend Tank	High-Low	High	Windrow	Included	EP	1.62157e-05	kg N eq
	ClearCove SCP	High-Low	High	Windrow	Included	EP	7.75672e-06	kg N eq
	Anaerobic Digestion	High-Low	High	Windrow	Included	EP	-0.00041	kg N eq
	Waste Receiving	High-Low	High	Windrow	Included	CED	5.13934	MJ
	Aeration Tanks	High-Low	High	Windrow	Included	CED	3.53305	MJ
	Primary Clarification	High-Low	High	Windrow	Included	CED	1.16289	MJ
	Pre-Anoxic & Swing tank	High-Low	High	Windrow	Included	CED	0.89064	MJ
	Influent Pump Station	High-Low	High	Windrow	Included	CED	0.88297	MJ
	Wet Well	High-Low	High	Windrow	Included	CED	0.69645	MJ
	Belt filter press	High-Low	High	Windrow	Included	CED	0.62776	MJ
	Gravity Belt Thickener	High-Low	High	Windrow	Included	CED	0.33404	MJ
	Wastewater collection	High-Low	High	Windrow	Included	CED	0.25606	MJ
	Control Building	High-Low	High	Windrow	Included	CED	0.14599	MJ
	Effluent release	High-Low	High	Windrow	Included	CED	0.13321	MJ
	Blend Tank	High-Low	High	Windrow	Included	CED	0.10638	MJ
	ClearCove SCP	High-Low	High	Windrow	Included	CED	0.05093	MJ
	Biosolids composting	High-Low	High	Windrow	Included	CED	0.04519	MJ
	Land Application	High-Low	High	Windrow	Included	CED	-0.88626	MJ
	Anaerobic Digestion	High-Low	High	Windrow	Included	CED	-4.79746	MJ
	Biosolids composting	High-Low	High	Windrow	Included	AP	0.02273	kg SO2 eq
	Aeration Tanks	High-Low	High	Windrow	Included	AP	0.01722	kg SO2 eq
	Land Application	High-Low	High	Windrow	Included	AP	0.00504	kg SO2 eq
	Primary Clarification	High-Low	High	Windrow	Included	AP	0.00498	kg SO2 eq
	Pre-Anoxic & Swing tank	High-Low	High	Windrow	Included	AP	0.00436	kg SO2 eq
	Wet Well	High-Low	High	Windrow	Included	AP	0.00345	kg SO2 eq
	Waste Receiving	High-Low	High	Windrow	Included	AP	0.0027	kg SO2 eq
	Influent Pump Station	High-Low	High	Windrow	Included	AP	0.00207	kg SO2 eq
	Belt filter press	High-Low	High	Windrow	Included	AP	0.00168	kg SO2 eq
	Wastewater collection	High-Low	High	Windrow	Included	AP	0.00123	kg SO2 eq
	Gravity Belt Thickener	High-Low	High	Windrow	Included	AP	0.0007	kg SO2 eq
	Blend Tank	High-Low	High	Windrow	Included	AP	0.00052	kg SO2 eq
	Effluent release	High-Low	High	Windrow	Included	AP	0.00035	kg SO2 eq
	ClearCove SCP	High-Low	High	Windrow	Included	AP	0.00026	kg SO2 eq
	Control Building	High-Low	High	Windrow	Included	AP	4.03547e-05	kg SO2 eq
	Anaerobic Digestion	High-Low	High	Windrow	Included	AP	-0.01325	kg SO2 eq
	Waste Receiving	High-Low	High	Windrow	Included	FDP	0.11719	kg oil eq
	Aeration Tanks	High-Low	High	Windrow	Included	FDP	0.06359	kg oil eq
	Primary Clarification	High-Low	High	Windrow	Included	FDP	0.02105	kg oil eq
	Pre-Anoxic & Swing tank	High-Low	High	Windrow	Included	FDP	0.01604	kg oil eq
	Influent Pump Station	High-Low	High	Windrow	Included	FDP	0.01509	kg oil eq
	Belt filter press	High-Low	High	Windrow	Included	FDP	0.01266	kg oil eq
	Wet Well	High-Low	High	Windrow	Included	FDP	0.01249	kg oil eq
	Gravity Belt Thickener	High-Low	High	Windrow	Included	FDP	0.00692	kg oil eq
	Wastewater collection	High-Low	High	Windrow	Included	FDP	0.0045	kg oil eq
	Control Building	High-Low	High	Windrow	Included	FDP	0.0028	kg oil eq
	Effluent release	High-Low	High	Windrow	Included	FDP	0.00236	kg oil eq
	Blend Tank	High-Low	High	Windrow	Included	FDP	0.00192	kg oil eq
	Biosolids composting	High-Low	High	Windrow	Included	FDP	0.00096	kg oil eq
	ClearCove SCP	High-Low	High	Windrow	Included	FDP	0.00091	kg oil eq
	Land Application	High-Low	High	Windrow	Included	FDP	-0.01196	kg oil eq
	Anaerobic Digestion	High-Low	High	Windrow	Included	FDP	-0.09864	kg oil eq
	Aeration Tanks	High-Low	High	Windrow	Included	PMFP	0.00233	kg PM2.5 eq
	Biosolids composting	High-Low	High	Windrow	Included	PMFP	0.00081	kg PM2.5 eq
	Primary Clarification	High-Low	High	Windrow	Included	PMFP	0.00068	kg PM2.5 eq
	Pre-Anoxic & Swing tank	High-Low	High	Windrow	Included	PMFP	0.00059	kg PM2.5 eq
	Wet Well	High-Low	High	Windrow	Included	PMFP	0.00047	kg PM2.5 eq
	Waste Receiving	High-Low	High	Windrow	Included	PMFP	0.00033	kg PM2.5 eq
	Influent Pump Station	High-Low	High	Windrow	Included	PMFP	0.00027	kg PM2.5 eq
	Belt filter press	High-Low	High	Windrow	Included	PMFP	0.00023	kg PM2.5 eq
	Wastewater collection	High-Low	High	Windrow	Included	PMFP	0.00017	kg PM2.5 eq
	Gravity Belt Thickener	High-Low	High	Windrow	Included	PMFP	9.51538e-05	kg PM2.5 eq
	Land Application	High-Low	High	Windrow	Included	PMFP	7.36066e-05	kg PM2.5 eq
	Blend Tank	High-Low	High	Windrow	Included	PMFP	6.99422e-05	kg PM2.5 eq
	Effluent release	High-Low	High	Windrow	Included	PMFP	4.99741e-05	kg PM2.5 eq
	ClearCove SCP	High-Low	High	Windrow	Included	PMFP	3.45622e-05	kg PM2.5 eq
	Control Building	High-Low	High	Windrow	Included	PMFP	8.8213e-06	kg PM2.5 eq
	Anaerobic Digestion	High-Low	High	Windrow	Included	PMFP	-0.00178	kg PM2.5 eq
	Aeration Tanks	High-Low	High	Windrow	Included	SFP	0.16577	kg O3 eq
	Primary Clarification	High-Low	High	Windrow	Included	SFP	0.04807	kg O3 eq
	Pre-Anoxic & Swing tank	High-Low	High	Windrow	Included	SFP	0.04209	kg O3 eq
	Waste Receiving	High-Low	High	Windrow	Included	SFP	0.03376	kg O3 eq
	Wet Well	High-Low	High	Windrow	Included	SFP	0.03313	kg O3 eq
	Influent Pump Station	High-Low	High	Windrow	Included	SFP	0.0194	kg O3 eq
	Belt filter press	High-Low	High	Windrow	Included	SFP	0.01599	kg O3 eq
	Wastewater collection	High-Low	High	Windrow	Included	SFP	0.01192	kg O3 eq
	Gravity Belt Thickener	High-Low	High	Windrow	Included	SFP	0.00665	kg O3 eq
	Blend Tank	High-Low	High	Windrow	Included	SFP	0.00497	kg O3 eq
	Effluent release	High-Low	High	Windrow	Included	SFP	0.00339	kg O3 eq
	Biosolids composting	High-Low	High	Windrow	Included	SFP	0.00303	kg O3 eq
	ClearCove SCP	High-Low	High	Windrow	Included	SFP	0.00246	kg O3 eq
	Control Building	High-Low	High	Windrow	Included	SFP	0.00054	kg O3 eq
	Land Application	High-Low	High	Windrow	Included	SFP	-0.00576	kg O3 eq
	Anaerobic Digestion	High-Low	High	Windrow	Included	SFP	-0.12725	kg O3 eq
	Waste Receiving	High-Low	High	Windrow	Included	WU	0.00034	m3 H2O
	Influent Pump Station	High-Low	High	Windrow	Included	WU	0.00018	m3 H2O
	Primary Clarification	High-Low	High	Windrow	Included	WU	0.00018	m3 H2O
	Aeration Tanks	High-Low	High	Windrow	Included	WU	0.00016	m3 H2O
	Control Building	High-Low	High	Windrow	Included	WU	0.00015	m3 H2O
	Effluent release	High-Low	High	Windrow	Included	WU	-0.03703	m3 H2O
	Belt filter press	High-Low	High	Windrow	Included	WU	4.77692e-05	m3 H2O
	Pre-Anoxic & Swing tank	High-Low	High	Windrow	Included	WU	4.32894e-05	m3 H2O
	Gravity Belt Thickener	High-Low	High	Windrow	Included	WU	3.04081e-05	m3 H2O
	Wet Well	High-Low	High	Windrow	Included	WU	1.75069e-05	m3 H2O
	Blend Tank	High-Low	High	Windrow	Included	WU	7.01795e-06	m3 H2O
	Wastewater collection	High-Low	High	Windrow	Included	WU	5.06089e-06	m3 H2O
	Biosolids composting	High-Low	High	Windrow	Included	WU	2.3342e-06	m3 H2O
	ClearCove SCP	High-Low	High	Windrow	Included	WU	7.6697e-07	m3 H2O
	Anaerobic Digestion	High-Low	High	Windrow	Included	WU	-1.22975e-05	m3 H2O
	Land Application	High-Low	High	Windrow	Included	WU	-0.00246	m3 H2O
	Biosolids composting	Medium-Base	High	Windrow	Included	GCCP	2.26417	kg CO2 eq
	Pre-Anoxic & Swing tank	Medium-Base	High	Windrow	Included	GCCP	0.21083	kg CO2 eq
	Aeration Tanks	Medium-Base	High	Windrow	Included	GCCP	0.16822	kg CO2 eq
	Waste Receiving	Medium-Base	High	Windrow	Included	GCCP	0.12355	kg CO2 eq
	Primary Clarification	Medium-Base	High	Windrow	Included	GCCP	0.05708	kg CO2 eq
	Effluent release	Medium-Base	High	Windrow	Included	GCCP	0.05264	kg CO2 eq
	Influent Pump Station	Medium-Base	High	Windrow	Included	GCCP	0.0505	kg CO2 eq
	Wet Well	Medium-Base	High	Windrow	Included	GCCP	0.03326	kg CO2 eq
	Belt filter press	Medium-Base	High	Windrow	Included	GCCP	0.01764	kg CO2 eq
	Gravity Belt Thickener	Medium-Base	High	Windrow	Included	GCCP	0.01455	kg CO2 eq
	Wastewater collection	Medium-Base	High	Windrow	Included	GCCP	0.01351	kg CO2 eq
	Control Building	Medium-Base	High	Windrow	Included	GCCP	0.0083	kg CO2 eq
	Blend Tank	Medium-Base	High	Windrow	Included	GCCP	0.00504	kg CO2 eq
	ClearCove SCP	Medium-Base	High	Windrow	Included	GCCP	0.00241	kg CO2 eq
	Anaerobic Digestion	Medium-Base	High	Windrow	Included	GCCP	-0.36998	kg CO2 eq
	Land Application	Medium-Base	High	Windrow	Included	GCCP	-0.65087	kg CO2 eq
	Effluent release	Medium-Base	High	Windrow	Included	EP	0.01161	kg N eq
	Land Application	Medium-Base	High	Windrow	Included	EP	0.00272	kg N eq
	Biosolids composting	Medium-Base	High	Windrow	Included	EP	0.00094	kg N eq
	Aeration Tanks	Medium-Base	High	Windrow	Included	EP	0.00055	kg N eq
	Influent Pump Station	Medium-Base	High	Windrow	Included	EP	0.00025	kg N eq
	Primary Clarification	Medium-Base	High	Windrow	Included	EP	0.0002	kg N eq
	Waste Receiving	Medium-Base	High	Windrow	Included	EP	0.00019	kg N eq
	Pre-Anoxic & Swing tank	Medium-Base	High	Windrow	Included	EP	0.00014	kg N eq
	Wet Well	Medium-Base	High	Windrow	Included	EP	0.00011	kg N eq
	Belt filter press	Medium-Base	High	Windrow	Included	EP	6.99221e-05	kg N eq
	Gravity Belt Thickener	Medium-Base	High	Windrow	Included	EP	6.05903e-05	kg N eq
	Wastewater collection	Medium-Base	High	Windrow	Included	EP	3.75598e-05	kg N eq
	Control Building	Medium-Base	High	Windrow	Included	EP	3.68746e-05	kg N eq
	Blend Tank	Medium-Base	High	Windrow	Included	EP	1.62157e-05	kg N eq
	ClearCove SCP	Medium-Base	High	Windrow	Included	EP	7.75672e-06	kg N eq
	Anaerobic Digestion	Medium-Base	High	Windrow	Included	EP	-0.00062	kg N eq
	Waste Receiving	Medium-Base	High	Windrow	Included	CED	4.27896	MJ
	Aeration Tanks	Medium-Base	High	Windrow	Included	CED	3.53305	MJ
	Primary Clarification	Medium-Base	High	Windrow	Included	CED	1.16289	MJ
	Pre-Anoxic & Swing tank	Medium-Base	High	Windrow	Included	CED	0.88705	MJ
	Influent Pump Station	Medium-Base	High	Windrow	Included	CED	0.88297	MJ
	Wet Well	Medium-Base	High	Windrow	Included	CED	0.69645	MJ
	Belt filter press	Medium-Base	High	Windrow	Included	CED	0.39804	MJ
	Gravity Belt Thickener	Medium-Base	High	Windrow	Included	CED	0.33404	MJ
	Wastewater collection	Medium-Base	High	Windrow	Included	CED	0.25606	MJ
	Control Building	Medium-Base	High	Windrow	Included	CED	0.14599	MJ
	Effluent release	Medium-Base	High	Windrow	Included	CED	0.13321	MJ
	Blend Tank	Medium-Base	High	Windrow	Included	CED	0.10638	MJ
	ClearCove SCP	Medium-Base	High	Windrow	Included	CED	0.05093	MJ
	Biosolids composting	Medium-Base	High	Windrow	Included	CED	0.02851	MJ
	Land Application	Medium-Base	High	Windrow	Included	CED	-0.56997	MJ
	Anaerobic Digestion	Medium-Base	High	Windrow	Included	CED	-8.57889	MJ
	Aeration Tanks	Medium-Base	High	Windrow	Included	AP	0.01722	kg SO2 eq
	Biosolids composting	Medium-Base	High	Windrow	Included	AP	0.01499	kg SO2 eq
	Primary Clarification	Medium-Base	High	Windrow	Included	AP	0.00498	kg SO2 eq
	Pre-Anoxic & Swing tank	Medium-Base	High	Windrow	Included	AP	0.00435	kg SO2 eq
	Wet Well	Medium-Base	High	Windrow	Included	AP	0.00345	kg SO2 eq
	Land Application	Medium-Base	High	Windrow	Included	AP	0.00324	kg SO2 eq
	Waste Receiving	Medium-Base	High	Windrow	Included	AP	0.00253	kg SO2 eq
	Influent Pump Station	Medium-Base	High	Windrow	Included	AP	0.00207	kg SO2 eq
	Wastewater collection	Medium-Base	High	Windrow	Included	AP	0.00123	kg SO2 eq
	Belt filter press	Medium-Base	High	Windrow	Included	AP	0.00107	kg SO2 eq
	Gravity Belt Thickener	Medium-Base	High	Windrow	Included	AP	0.0007	kg SO2 eq
	Blend Tank	Medium-Base	High	Windrow	Included	AP	0.00052	kg SO2 eq
	Effluent release	Medium-Base	High	Windrow	Included	AP	0.00035	kg SO2 eq
	ClearCove SCP	Medium-Base	High	Windrow	Included	AP	0.00026	kg SO2 eq
	Control Building	Medium-Base	High	Windrow	Included	AP	4.03547e-05	kg SO2 eq
	Anaerobic Digestion	Medium-Base	High	Windrow	Included	AP	-0.01972	kg SO2 eq
	Waste Receiving	Medium-Base	High	Windrow	Included	FDP	0.09726	kg oil eq
	Aeration Tanks	Medium-Base	High	Windrow	Included	FDP	0.06359	kg oil eq
	Primary Clarification	Medium-Base	High	Windrow	Included	FDP	0.02105	kg oil eq
	Pre-Anoxic & Swing tank	Medium-Base	High	Windrow	Included	FDP	0.01598	kg oil eq
	Influent Pump Station	Medium-Base	High	Windrow	Included	FDP	0.01509	kg oil eq
	Wet Well	Medium-Base	High	Windrow	Included	FDP	0.01249	kg oil eq
	Belt filter press	Medium-Base	High	Windrow	Included	FDP	0.00803	kg oil eq
	Gravity Belt Thickener	Medium-Base	High	Windrow	Included	FDP	0.00692	kg oil eq
	Wastewater collection	Medium-Base	High	Windrow	Included	FDP	0.0045	kg oil eq
	Control Building	Medium-Base	High	Windrow	Included	FDP	0.0028	kg oil eq
	Effluent release	Medium-Base	High	Windrow	Included	FDP	0.00236	kg oil eq
	Blend Tank	Medium-Base	High	Windrow	Included	FDP	0.00192	kg oil eq
	ClearCove SCP	Medium-Base	High	Windrow	Included	FDP	0.00091	kg oil eq
	Biosolids composting	Medium-Base	High	Windrow	Included	FDP	0.00061	kg oil eq
[truncated: 11,826 more rows]
